# Supplementary material for: α-Amination of keto-nitrones via Multihetero-Cope rearrangement employing an imidoyl chloride reagent
Source: Royal Society of Chemistry journal article supplement (doi:10.1039/c2cc33401a), 2012-01-01
Supplement: c2cc33401a.pdf [file c2cc33401a.pdf]

## Supporting Information

### **$\alpha$ -Amination of Keto-Nitrones via Multihetero-Cope Rearrangement Employing an Imidoyl Chloride Reagent**

Justin T. Malinowski, Ericka J. Malow, and Jeffrey S. Johnson\*

*Department of Chemistry, University of North Carolina at Chapel Hill, Chapel Hill, North Carolina 27599-3290, United States*

[jsj@unc.edu](mailto:jsj@unc.edu)

#### Table of Contents

|                                             |     |
|---------------------------------------------|-----|
| General Methods and Materials               | S2  |
| General Procedure A for Nitronone Synthesis | S3  |
| General Procedure B for [3,3]-Rearrangement | S7  |
| Secondary Transformations                   | S14 |
| <sup>1</sup> H, <sup>13</sup> C NMR Spectra | S16 |

**Methods: General.** Infrared (IR) spectra were obtained using a Jasco 460 Plus Fourier transform infrared spectrometer. Proton and carbon magnetic resonance spectra ( $^1\text{H}$  NMR and  $^{13}\text{C}$  NMR) were recorded on a Bruker model Avance 400 ( $^1\text{H}$  NMR at 400 MHz and  $^{13}\text{C}$  at 100 MHz) or a Bruker model Avance 600 ( $^1\text{H}$  NMR at 600 MHz and  $^{13}\text{C}$  NMR at 150 MHz) spectrometer with solvent resonance as the internal standard ( $^1\text{H}$  NMR:  $\text{CDCl}_3$  at 7.26 ppm;  $^{13}\text{C}$  NMR:  $\text{CDCl}_3$  at 77.0 ppm).  $^1\text{H}$  NMR data are reported as follows: chemical shift, multiplicity (s = singlet, br s = broad singlet, d = doublet, t = triplet, br t = broad triplet, q = quartet, m = multiplet), coupling constants (Hz), and integration. Mass spectra were obtained using a Bruker BioTOF II spectrometer with electrospray ionization calibrated with CsOAc or an Agilent Technologies 6520, Accurate – Mass QTOF LCMS, 1200 series LC with dual spray ESI source. All samples were prepared in methanol. Analytical thin layer chromatography (TLC) was performed on Sorbent Technologies 0.20 mm Silica G TLC plates. Visualization was accomplished with UV light and/or aqueous ceric ammonium nitrate solution followed by heating. Purification of the reaction products was carried out by flash chromatography using Siliaflash-P60 silica gel (40–63 $\mu\text{m}$ ) purchased from Silicycle. Unless otherwise noted, all reactions were carried out under an atmosphere of dry nitrogen in oven-dried glassware with magnetic stirring. Yield refers to isolated yield of analytically pure material unless otherwise noted. Yields are reported for a specific experiment and as a result may differ slightly from those found in the tables, which are averages of at least two experiments. Nitron stereochemistry was assigned by  $^1\text{H}$  NOESY analysis.

**Materials: General.** Dichloromethane was dried by passage through a column of neutral alumina under nitrogen prior to use. Triethylamine was freshly distilled from calcium hydride prior to use. Benzyl-hydroxylamine,<sup>1</sup> *p*-methoxy-benzylhydroxylamine,<sup>2</sup> *p*-methyl-benzylhydroxylamine,<sup>3</sup> *p*-chloro-benzylhydroxylamine,<sup>3</sup> and (*S*)- $\alpha$ -methyl-benzylhydroxylamine<sup>4</sup> were prepared according to the published procedures. Imidoyl chloride (**1**) was prepared via the literature method.<sup>5</sup> Nitron **S11** was prepared via the published method.<sup>6</sup> All other reagents were purchased from commercial sources and were used as received unless otherwise noted.

---

<sup>1</sup> Maskill, H.; Jencks, W. P. *J. Am. Chem. Soc.* **1987**, *109*, 2062.

<sup>2</sup> Nakano, Y.; Kato, Y.; Imai, K.; Ochiai, E.; Namekawa, J.; Ishizuka, S.; Takenouchi, K.; Tanatani, A.; Hashimoto, Y.; Nagasawa, K. *J. Med. Chem.* **2006**, *49*, 2398.

<sup>3</sup> Gordon, I. M.; Maskill, H. *J. Chem. Soc., Perkin Trans. 2* **2001**, 2059.

<sup>4</sup> Breuning, M.; Hauser, T.; Tanzer, E.-M. *Org. Lett.*, **2009**, *11*, 4032.

<sup>5</sup> Osipov, S.; Artyushin, O.; Kolomiets, A.; Bruneau, C.; Dixneuf, P. *Synlett*, **2000**, 1031.

<sup>6</sup> Pfeiffer, J. Y.; Beauchemin, A. M. *J. Org. Chem.*, **2009**, *74*, 8381.

### General Procedure A for Nitrone Synthesis:

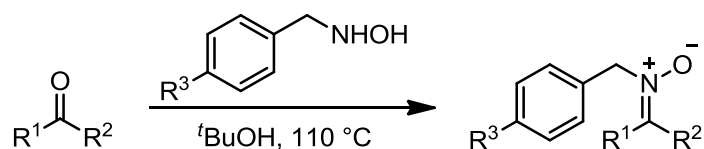

An oven-dried 4-mL scintillation vial equipped with magnetic stir bar was charged with the appropriate ketone (2.0 mmol, 2.0 equiv) and hydroxylamine (1.0 mmol, 1 equiv). The vial was purged with nitrogen and *tert*-butanol (2.0 mL) was added. The septum was replaced with a Teflon-sealed cap and the reaction was stirred at 110 °C for 14 h. The reaction was cooled to 23 °C and volatiles were removed *in vacuo*. The crude product was purified via flash chromatography (SiO<sub>2</sub>) to give the desired product.

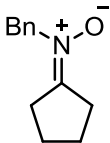 ***N*-Cyclopentylidene-1-phenylmethanamine oxide (2):** The title compound was prepared according to General Procedure A using cyclopentanone (1.00 mL, 11.3 mmol, 2.0 equiv) and benzylhydroxylamine (695 mg, 5.64 mmol, 1.0 equiv) in *t*BuOH (10 mL). Purification by flash chromatography (dichloromethane to 98:2 dichloromethane/methanol) furnished **2** as a tan solid (800 mg, 4.23 mmol, 75%). Analytical data: **mp** 64-67.5 °C; **<sup>1</sup>H NMR** (400 MHz, CDCl<sub>3</sub>): δ 7.38 (d, *J* = 7.2 Hz, 2H), 7.33-7.27 (m, 3H), 4.90 (s, 2H), 2.65 (br s, 2H), 2.50 (br s, 2H), 1.83-1.74 (m, 4H); **<sup>13</sup>C NMR** (100 MHz, CDCl<sub>3</sub>): δ 155.9, 133.2, 128.5, 128.0, 127.9, 65.0, 30.9, 30.8, 26.1, 24.3; **HRMS (ESI<sup>+</sup>)** Calcd. for C<sub>12</sub>H<sub>15</sub>NO+H, 190.1232; Found, 190.1229; **IR** (thin film, cm<sup>-1</sup>) 3398, 2965, 2876, 1632, 1454, 1136, 960; **TLC** (95:5 dichloromethane/methanol): R<sub>f</sub> = 0.20.

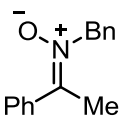 **(*Z*)-1-Phenyl-*N*-(1-phenylethylidene)methanamine oxide (6):** The title compound was prepared according to General Procedure A using acetophenone (0.234 mL, 2.0 mmol, 2.0 equiv) and benzyl-hydroxylamine (123 mg, 1.0 mmol, 1.0 equiv) in *t*BuOH (2 mL). Purification by flash chromatography (100:0 to 98:2 dichloromethane/methanol) furnished **6** as a pale yellow oil (111 mg, 0.493 mmol, 49%). Analytical data: **<sup>1</sup>H NMR** (400 MHz, CDCl<sub>3</sub>): δ 7.42-7.39 (m, 3H), 7.31-7.28 (m, 5H), 7.21-7.19 (m, 2H), 4.97 (s, 2H), 2.45 (s, 3H); **<sup>13</sup>C NMR** (100 MHz, CDCl<sub>3</sub>): δ 147.6, 136.2, 134.2, 129.1, 128.8, 128.4, 128.1, 128.0, 127.5, 63.8, 20.6; **HRMS (ESI<sup>+</sup>)** Calcd. for C<sub>15</sub>H<sub>15</sub>NO+Na, 248.1052; Found, 248.1050; **IR** (thin film, cm<sup>-1</sup>) 3223, 3060, 1579, 1495, 1453, 1265, 1178; **TLC** (95:5 dichloromethane/methanol): R<sub>f</sub> = 0.1.

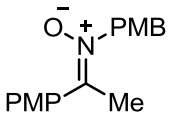 **(*Z*)-1-(4-Methoxyphenyl)-*N*-(1-(4-methoxyphenyl)ethylidene) methanamine oxide (S1):** The title compound was prepared according to General Procedure A using *p*-methoxyacetophenone (300 mg, 2.0 mmol, 2.0 equiv) and *p*-methoxybenzylhydroxylamine (153 mg, 1.0 mmol, 1.0 equiv) in *t*BuOH (2 mL). Purification by flash chromatography (100:0 to 98:2 dichloromethane/methanol) furnished **S1** as

a yellow oil with a 6:1 diastereomeric ratio (37 mg, 0.130 mmol, 13%). Analytical data:  $^1\text{H NMR}$  (400 MHz,  $\text{CDCl}_3$ ):  $\delta$  7.23 (d,  $J = 8.4$  Hz, 2H), 7.13 (d,  $J = 8.4$  Hz, 2H), 6.92 (d,  $J = 8.8$  Hz, 2H), 6.83 (d,  $J = 8.8$  Hz, 2H), 4.89 (s, 2H), 3.82 (s, 3H), 3.76 (s, 3H), 2.39 (s, 3H);  $^{13}\text{C NMR}$  (100 MHz,  $\text{CDCl}_3$ ):  $\delta$  160.0, 159.3, 147.0, 130.4, 130.1, 129.7, 129.0, 128.5, 126.5, 114.2, 114.1, 113.8, 113.1, 63.0, 55.3, 55.2, 55.2, 20.7, 19.2; **HRMS (ESI<sup>+</sup>)** Calcd. for  $\text{C}_{17}\text{H}_{19}\text{NO}_3+\text{H}$ , 286.1443; Found, 286.1444; **IR** (thin film,  $\text{cm}^{-1}$ ) 3349, 2958, 2837, 2220, 1609, 1512, 1441, 1249, 1175; **TLC** (95:5 dichloromethane/methanol):  $R_f = 0.1$ .

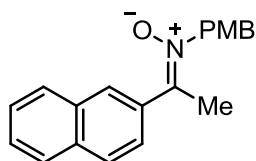

**(Z)-1-(4-Methoxyphenyl)-N-(1-(naphthalen-2-yl)ethylidene)methanamine oxide (S2):**

The title compound was prepared according to General Procedure A using 2-acetonaphthone (340 mg, 2.0 mmol, 2.0 equiv) and *p*-methoxy-benzylhydroxylamine (153 mg, 1.0 mmol, 1.0 equiv) in <sup>t</sup>BuOH (2 mL). Purification by flash chromatography (98:2 dichloromethane/methanol) furnished **S2** as a yellow oil (97.1 mg, 0.318 mmol, 32%). Analytical data:  $^1\text{H NMR}$  (400 MHz,  $\text{CDCl}_3$ ):  $\delta$  7.50-7.45 (m, 2H), 7.41-7.38 (m, 1H), 7.17-7.13 (m, 2H), 6.91 (d,  $J = 8.4$  Hz, 1H), 6.83 (d,  $J = 8.8$  Hz, 2H), 6.43 (d,  $J = 8.8$  Hz, 2H), 4.53 (s, 2H), 3.37 (s, 3H), 2.09 (s, 3H);  $^{13}\text{C NMR}$  (100 MHz,  $\text{CDCl}_3$ ):  $\delta$  159.5, 147.1, 133.6, 133.1, 132.8, 129.9, 128.9, 128.2, 127.8, 127.4, 127.3, 127.1, 126.5, 124.8, 113.9, 63.5, 55.3, 20.8; **HRMS (ESI<sup>+</sup>)** Calcd. for  $\text{C}_{20}\text{H}_{19}\text{NO}_2+\text{Na}$ , 328.1314; Found, 328.1324; **IR** (thin film,  $\text{cm}^{-1}$ ) 3408, 3053, 2986, 1513, 1265, 1213, 1176; **TLC** (95:5 dichloromethane/methanol):  $R_f = 0.14$ .

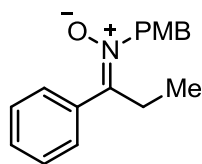

**(Z)-1-(4-Methoxyphenyl)-N-(1-phenylpropylidene)methanamine oxide (S3):**

The title compound was prepared according to General Procedure A using propiophenone (0.26 mL, 2.0 mmol, 2.0 equiv) and *p*-methoxy-benzylhydroxylamine (153 mg, 1.0 mmol, 1.0 equiv) in <sup>t</sup>BuOH (2 mL). Purification by flash chromatography (98:2 dichloromethane/methanol) furnished **S3** as a pale yellow oil (83.2 mg, 0.309 mmol, 31%). Analytical data:  $^1\text{H NMR}$  (400 MHz,  $\text{CDCl}_3$ ):  $\delta$  7.44-7.42 (m, 3H), 7.20-7.15 (m, 4H), 6.82 (d,  $J = 8.8$  Hz, 2H), 4.80 (s, 2H), 3.78 (s, 3H), 2.88 (q,  $J = 7.2, 7.6$  Hz, 2H), 1.02 (t,  $J = 7.4$  Hz, 3H);  $^{13}\text{C NMR}$  (100 MHz,  $\text{CDCl}_3$ ):  $\delta$  159.4, 151.6, 135.1, 129.9, 129.1, 128.9, 128.0, 126.4, 113.8, 63.8, 55.2, 26.2, 9.3; **HRMS (ESI<sup>+</sup>)** Calcd. for  $\text{C}_{17}\text{H}_{19}\text{NO}_2+\text{H}$ , 270.1495; Found, 270.1497; **IR** (thin film,  $\text{cm}^{-1}$ ) 3409, 3053, 2985, 1612, 1493, 1265, 1177; **TLC** (95:5 dichloromethane/methanol):  $R_f = 0.16$ .

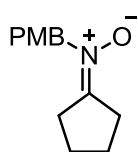

**N-Cyclopentylidene-1-(4-methoxyphenyl)methanamine oxide (S4):**

The title compound was prepared according to General Procedure A using cyclopentanone (0.177 mL, 2.0 mmol, 2.0 equiv) and *p*-methoxy-benzylhydroxylamine (153 mg, 1.00 mmol, 1.0 equiv) in <sup>t</sup>BuOH (2 mL). Purification by flash chromatography (100:0 to 95:5 dichloromethane/methanol) furnished **S4** as a brown oil (192 mg, 0.876 mmol, 88%). Analytical data:  $^1\text{H NMR}$  (400 MHz,  $\text{CDCl}_3$ ):  $\delta$  7.32 (d,  $J = 8.8$  Hz, 2H), 6.82 (d,  $J = 8.8$  Hz, 2H), 4.82 (s, 2H), 3.73 (s, 2H), 2.61 (t,  $J = 7.2$  Hz, 2H), 2.50 (t,  $J = 7.2$  Hz, 2H), 1.81-1.72 (m, 4H);  $^{13}\text{C NMR}$  (100 MHz,  $\text{CDCl}_3$ ):  $\delta$  159.4, 155.0, 129.5, 125.5, 113.9, 64.5,

55.1, 30.9, 26.2, 24.3; **HRMS (ESI<sup>+</sup>)** Calcd. for C<sub>13</sub>H<sub>17</sub>NO<sub>2</sub>+H, 220.1337; Found, 220.1338; **IR** (thin film, cm<sup>-1</sup>) 3388, 2963, 1612, 1513, 1250, 1179, 1133, 1029; **TLC** (95:5 dichloromethane/methanol): R<sub>f</sub> = 0.15.

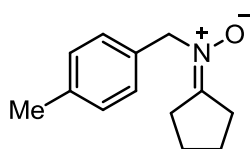

**N-Cyclopentylidene-1-(p-tolyl)methanamine oxide (S5):** The title compound was prepared according to General Procedure A using cyclopentanone (0.18 mL, 2.0 mmol, 2.0 equiv) and *p*-methylbenzylhydroxylamine (137 mg, 1.0 mmol, 1.0 equiv) in <sup>t</sup>BuOH (2 mL). Purification by flash chromatography (98:2 to 95:5 dichloromethane/methanol) furnished **S5** as an off-white semi-solid (160 mg, 0.787 mmol, 77%). Analytical data: **<sup>1</sup>H NMR** (400 MHz, CDCl<sub>3</sub>): δ 7.29 (d, *J* = 8.0 Hz, 2H), 7.13 (d, *J* = 9.6 Hz, 2H), 4.88 (s, 2H), 2.65 (t, *J* = 7.2, 2H), 2.51 (t, *J* = 6.8 Hz, 2H), 2.31 (s, 3H), 1.85-1.75 (m, 4H); **<sup>13</sup>C NMR** (100 MHz, CDCl<sub>3</sub>): δ 155.2, 137.8, 130.3, 129.2, 128.0, 64.9, 30.9, 30.9, 26.2, 24.3, 20.9; **HRMS (ESI<sup>+</sup>)** Calcd. for C<sub>13</sub>H<sub>17</sub>NO+Na, 226.1208; Found, 226.1208; **IR** (thin film, cm<sup>-1</sup>) 3388, 2964, 2875, 2207, 1627, 1514, 1452, 1142; **TLC** (95:5 dichloromethane/methanol): R<sub>f</sub> = 0.4.

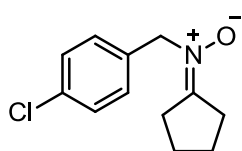

**1-(4-Chlorophenyl)-N-cyclopentylidenemethanamine oxide (S6):** The title compound was prepared according to General Procedure A using cyclopentanone (0.18 mL, 2.0 mmol, 2.0 equiv) and *p*-chlorobenzylhydroxylamine (157 mg, 1.0 mmol, 1.0 equiv) in <sup>t</sup>BuOH (2 mL). Purification by flash chromatography (98:2 dichloromethane/methanol) furnished **S6** as an off-white solid (175 mg, 0.784 mmol, 78%). Analytical data: **mp** 104-107 °C; **<sup>1</sup>H NMR** (400 MHz, CDCl<sub>3</sub>): δ 7.39 (d, *J* = 8.4 Hz, 2H), 7.34 (d, *J* = 8.4 Hz, 2H), 4.92 (s, 2H), 2.69 (t, *J* = 7.2 Hz, 2H), 2.54 (t, *J* = 7.0 Hz, 2H), 1.90-1.80 (m, 4H); **<sup>13</sup>C NMR** (100 MHz, CDCl<sub>3</sub>): δ 155.8, 134.2, 131.9, 129.6, 128.9, 64.3, 31.1, 31.1, 26.3, 24.5; **HRMS (ESI<sup>+</sup>)** Calcd. for C<sub>12</sub>H<sub>14</sub>ClNO+H, 224.0841; Found, 224.0843; **IR** (thin film, cm<sup>-1</sup>) 3388, 2964, 2875, 2207, 1627, 1514, 1452, 1142; **TLC** (95:5 dichloromethane/methanol): R<sub>f</sub> = 0.12.

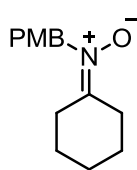

**N-Cyclohexylidene-1-(4-methoxyphenyl)methanamine oxide (S7):** The title compound was prepared according to General Procedure A using cyclohexanone (0.2 mL, 2.00 mmol, 2.0 equiv) and *p*-methoxybenzylhydroxylamine (153 mg, 1.00 mmol, 1.0 equiv) in <sup>t</sup>BuOH (2 mL). Purification by flash chromatography (100:0 to 95:5 dichloromethane/methanol) furnished **S7** as a yellow oil (167 mg, 0.716 mmol, 71%). Analytical data: **<sup>1</sup>H NMR** (400 MHz, CDCl<sub>3</sub>): δ 7.30 (d, *J* = 8.8 Hz, 2H), 6.83 (d, *J* = 8.4 Hz, 2H), 4.98 (s, 2H), 3.74 (s, 3H), 2.71 (t, *J* = 6.4, 2H), 2.46 (t, *J* = 6.0 Hz, 2H), 1.65-1.59 (m, 2H), 1.56-1.48 (m, 4H); **<sup>13</sup>C NMR** (100 MHz, CDCl<sub>3</sub>): δ 159.3, 149.3, 129.0, 126.2, 114.0, 63.0, 55.1, 29.9, 26.8, 25.5, 24.5; **HRMS (ESI<sup>+</sup>)** Calcd. for C<sub>14</sub>H<sub>19</sub>NO+H, 234.1494; Found, 234.1484; **IR** (thin film, cm<sup>-1</sup>) 3400, 2937, 2860, 1612, 1513, 1249, 1032, 734; **TLC** (95:5 dichloromethane/methanol): R<sub>f</sub> = 0.2.

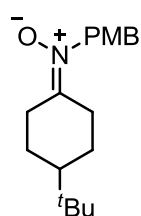

**N-(4-(Tert-butyl)cyclohexylidene)-1-(4-methoxyphenyl)methanamine oxide (S8):** The title compound was prepared according to General Procedure A using 4-butylcyclohexanone (308 mg, 2.0 mmol, 2.0 equiv) and *p*-methoxybenzylhydroxylamine (153 mg, 1.0 mmol, 1.0 equiv) in *t*BuOH (2 mL). Purification by flash chromatography (100:0 to 98:2 dichloromethane/methanol) furnished **S8** as a pale yellow solid (220 mg, 0.761 mmol, 76%). Analytical data: **mp** 74-77.5 °C; **<sup>1</sup>H NMR** (400 MHz, CDCl<sub>3</sub>): δ 7.34 (d, *J* = 8.8 Hz, 2H), 6.88 (d, *J* = 8.8 Hz, 2H), 5.03 (d, *J* = 14.0 Hz, 1H), 4.99 (d, *J* = 14.0 Hz, 1H), 3.79 (s, 3H), 3.60-3.56 (m, 1H), 2.88-2.84 (m, 1H), 2.01-1.86 (m, 3H), 1.25-1.15 (m, 3H), 0.812 (s, 9H); **<sup>13</sup>C NMR** (100 MHz, CDCl<sub>3</sub>): δ 159.3, 149.3, 129.1, 126.1, 114.0, 63.0, 55.1, 46.1, 32.3, 29.8, 27.3, 27.0, 26.2, 25.0; **HRMS (ESI<sup>+</sup>)** Calcd. for C<sub>18</sub>H<sub>27</sub>NO<sub>2</sub>+H, 290.2120; Found, 290.2121; **IR** (thin film, cm<sup>-1</sup>) 3409, 3053, 2985, 1612, 1493, 1265, 1177; **TLC** (95:5 dichloromethane/methanol): R<sub>f</sub> = 0.16.

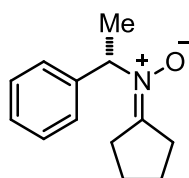

**(S)-N-Cyclopentylidene-1-phenylethanamine oxide (S9):** The title compound was prepared according to General Procedure A using cyclopentanone (0.18 mL, 2.0 mmol, 2.0 equiv) and (*S*)- $\alpha$ -methyl-benzyl-hydroxylamine<sup>4</sup> (137 mg, 1.0 mmol, 1.0 equiv) in *t*BuOH (2 mL). Purification by flash chromatography (98:2 dichloromethane/methanol) furnished **S9** as an off-white solid (177.0 mg, 0.871 mmol, 87%). Analytical data: **mp** 76-79 °C; **<sup>1</sup>H NMR** (400 MHz, CDCl<sub>3</sub>): δ 7.47 (d, *J* = 7.6 Hz, 2H), 7.35-7.28 (m, 3H), 5.15 (q, *J* = 6.8 Hz, 1H), 2.75-2.49 (m, 4H), 1.88-1.78 (m, 4H), 1.75 (d, *J* = 6.8 Hz, 3H); **<sup>13</sup>C NMR** (100 MHz, CDCl<sub>3</sub>): δ 154.2, 139.1, 128.6, 128.1, 127.0, 67.7, 31.2, 30.6, 26.3, 24.3, 19.3; **HRMS (ESI<sup>+</sup>)** Calcd. for C<sub>13</sub>H<sub>17</sub>NO+Na, 226.1208; Found, 226.1214; **IR** (thin film, cm<sup>-1</sup>) 3399, 2967, 2876, 2190, 1622, 1454, 1255, 1172, 1141, 1055; **TLC** (95:5 dichloromethane/methanol): R<sub>f</sub> = 0.13.

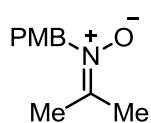

**1-(4-Methoxyphenyl)-N-(propan-2-ylidene)methanamine oxide (S10):** The title compound was prepared according to General Procedure A using acetone (0.44 mL, 6.0 mmol, 2.0 equiv) and *p*-methoxy-benzylhydroxylamine (459 mg, 3.0 mmol, 1.0 equiv) in *t*BuOH (6 mL). Purification by flash chromatography (98:2 to 95:5 dichloromethane/methanol) furnished **S10** as a pale brown oil (257 mg, 1.33 mmol, 44%). Analytical data: **<sup>1</sup>H NMR** (400 MHz, CDCl<sub>3</sub>): δ 7.32 (d, *J* = 8.4 Hz, 2H), 6.85 (d, *J* = 8.4 Hz, 2H), 4.95 (s, 2H), 3.75 (s, 3H), 2.11 (d, *J* = 5.6 Hz, 6H); **<sup>13</sup>C NMR** (100 MHz, CDCl<sub>3</sub>): δ 159.4, 143.1, 129.1, 125.8, 114.0, 63.2, 55.2, 20.4, 19.9; **HRMS (ESI<sup>+</sup>)** Calcd. for C<sub>11</sub>H<sub>15</sub>NO<sub>2</sub>+H, 194.1181; Found, 194.1182; **IR** (thin film, cm<sup>-1</sup>) 3348, 2958, 2213, 1612, 1513, 1441, 1304, 1177, 1156; **TLC** (95:5 dichloromethane/methanol): R<sub>f</sub> = 0.05.

### General Procedure B for [3,3]-Rearrangement:

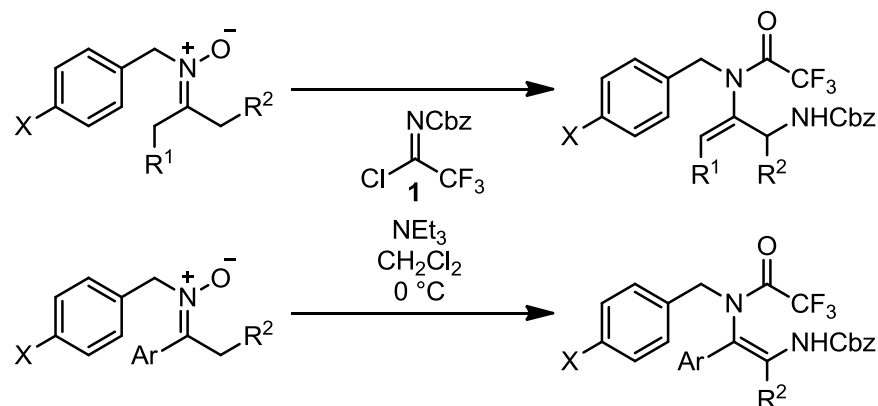

An oven-dried 4-mL scintillation vial equipped with magnetic stir bar was charged with imidoyl chloride **1** (0.26 g, 0.1 mmol, 1.0 equiv) and purged with nitrogen. Dichloromethane (0.5 mL) was added and the solution was cooled to 0 °C in an ice/water bath. Triethylamine (0.028 mL, 0.2 mmol, 2.0 equiv) was then added, followed by a cooled dichloromethane solution (0.5 mL) of nitrone **2**, **6**, **S1-S11** (0.1 mmol, 1.0 equiv). The reaction was stirred at 0 °C until judged complete by TLC analysis, generally 30 min. Upon completion, volatiles were removed *in vacuo*. The crude product was purified via flash chromatography (SiO<sub>2</sub>) to give the desired product.

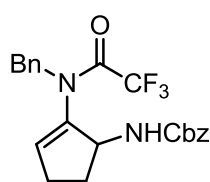

**Benzyl carbamate (3)** (**2-(N-benzyl-2,2,2-trifluoroacetamido)cyclopent-2-en-1-yl**) carbamate (**3**): The title compound was prepared according to General Procedure B using nitrone **2** (57 mg, 0.305 mmol, 1.0 equiv), imidoyl chloride **1** (81 mg, 0.305 mmol, 1.0 equiv) and triethylamine (85  $\mu$ L, 0.61 mmol, 2.0 equiv) in CH<sub>2</sub>Cl<sub>2</sub> (2 mL). Purification by flash chromatography (90:10 petroleum ether/acetone) furnished **3** as a yellow oil (82 mg, 0.196 mmol,

65%). Analytical data: <sup>1</sup>H NMR (400 MHz, CDCl<sub>3</sub>):  $\delta$  7.38-7.25 (m, 10H), 5.56 (s, 1H), 5.21 (d,  $J$  = 14.4 Hz, 1H), 5.16 (d,  $J$  = 12.4 Hz, 1H), 5.08 (d,  $J$  = 12.0 Hz, 1H), 5.05-4.99 (m, 1H), 4.74 (d,  $J$  = 9.6 Hz, 1H), 4.28 (d,  $J$  = 14.8 Hz, 1H), 2.49-2.44 (m, 1H), 2.36-2.30 (m, 1H), 2.21-2.15 (m, 1H), 1.70-1.63 (m, 1H); <sup>13</sup>C NMR (100 MHz, CDCl<sub>3</sub>):  $\delta$  157.1, 156.8, 155.9, 137.8, 136.1, 135.1, 132.9, 128.6, 128.6, 128.2, 128.1, 127.9, 67.0, 54.0, 49.6, 30.9, 27.1; HRMS (ESI<sup>+</sup>) Calcd. for C<sub>22</sub>H<sub>21</sub>F<sub>3</sub>N<sub>2</sub>O<sub>3</sub>+Na, 441.1402; Found, 441.1402; IR (thin film, cm<sup>-1</sup>) 3428, 3352, 3064, 2950, 1693, 1512, 1208, 1157, 1051; TLC (60:40 petroleum ether/acetone): R<sub>f</sub> = 0.60.

### <sup>1</sup>H COSY analysis of **3** supporting acyl transfer:

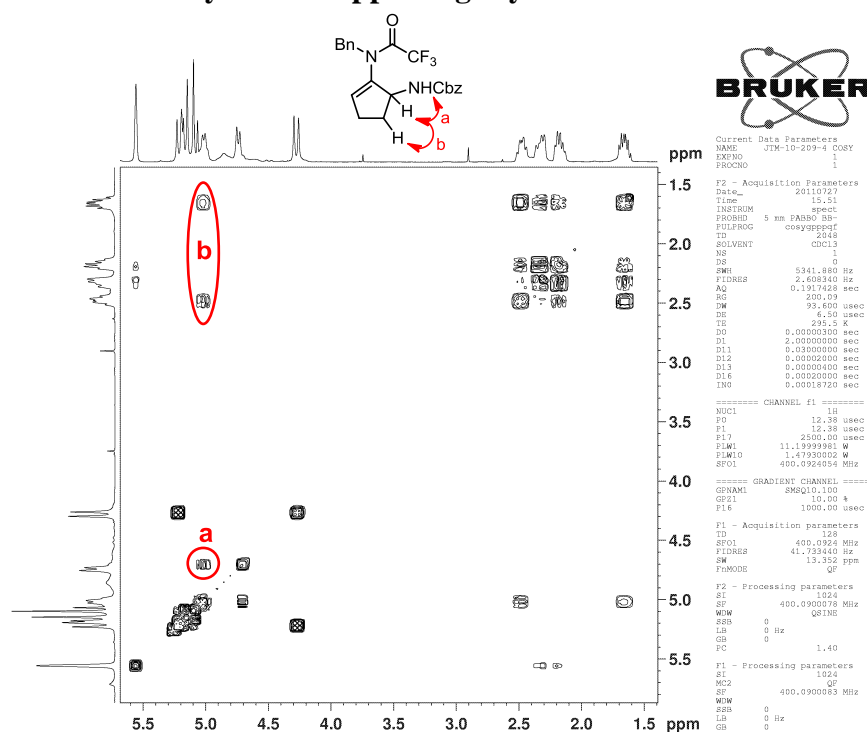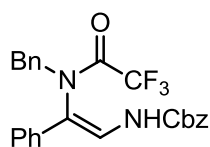

**(Z)-Benzyl (2-(N-benzyl-2,2,2-trifluoroacetamido)-2-phenylvinyl) carbamate (7):** The title compound was prepared according to General Procedure B using nitron **6** (22 mg, 0.10 mmol, 1.0 equiv), imidoyl chloride **1** (26.5 mg, 0.1 mmol, 1.0 equiv) and triethylamine (28  $\mu$ L, 0.20 mmol, 2.0 equiv) in  $\text{CH}_2\text{Cl}_2$  (1 mL). Purification by flash chromatography (90:10 petroleum ether/acetone) furnished **7** as a colorless oil (28 mg, 0.062 mmol, 61%). Analytical data: <sup>1</sup>H NMR (400 MHz,  $\text{CDCl}_3$ ):  $\delta$  7.40-7.15 (m, 15H), 5.70 (d,  $J$  = 10.8 Hz, 1H), 5.60 (d,  $J$  = 13.2 Hz, 1H), 5.10 (d,  $J$  = 12.4 Hz, 1H), 4.92 (d,  $J$  = 12.0 Hz, 1H), 3.76 (d,  $J$  = 13.6 Hz, 1H); <sup>13</sup>C NMR (100 MHz,  $\text{CDCl}_3$ ):  $\delta$  158.7, 158.3, 152.6, 135.6, 135.3, 133.6, 129.5, 129.1, 129.0, 128.8, 128.4, 128.4, 128.0, 127.7, 123.8, 123.5, 117.7, 67.5, 51.6; HRMS (ESI<sup>+</sup>) Calcd. for  $\text{C}_{25}\text{H}_{21}\text{F}_3\text{N}_2\text{O}_3+\text{H}$ , 455.1582; Found, 455.1585; IR (thin film,  $\text{cm}^{-1}$ ) 3409, 3053, 1691, 1665, 1482, 1265, 1211, 1174; TLC (75:25 hexanes/ethyl acetate):  $R_f$  = 0.30.

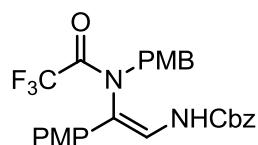

**(Z)-Benzyl (2-(4-methoxyphenyl)-2-(2,2,2-trifluoro-N-(4-methoxybenzyl)acetamido)vinyl) carbamate (10):** The title compound was prepared according to General Procedure B using nitron **S1** (30 mg, 0.105 mmol, 1.0 equiv), imidoyl chloride **1** (28 mg, 0.105 mmol, 1.0 equiv) and triethylamine (30  $\mu$ L, 0.21 mmol, 2.0 equiv) in  $\text{CH}_2\text{Cl}_2$  (1 mL). Purification by flash chromatography (90:10 petroleum ether/acetone) furnished **10** as a pale yellow oil (37 mg, 0.072 mmol, 69%). Analytical data: <sup>1</sup>H NMR (600 MHz,  $\text{CDCl}_3$ ):  $\delta$  7.39-7.22 (m, 9H), 6.92 (d,  $J$  = 9.0 Hz, 2H), 6.82 (d,  $J$  = 8.4 Hz, 2H), 5.72 (d,  $J$  = 11.4 Hz, 1H), 5.50 (d,  $J$  =



13.2 Hz, 1H), 5.06 (d,  $J = 12.6$  Hz, 1H), 4.97 (d,  $J = 12.6$  Hz, 1H), 3.83 (s, 3H), 3.72 (d,  $J = 13.8$  Hz, 1H), 3.67 (s, 3H);  $^{13}\text{C}$  NMR (150 MHz,  $\text{CDCl}_3$ ):  $\delta$  160.0, 159.4, 152.8, 135.4, 130.9, 128.8, 128.6, 128.3, 127.7, 126.0, 125.4, 121.8, 117.9, 114.5, 114.5, 67.5, 55.3, 55.2, 50.9; HRMS ( $\text{ESI}^+$ ) Calcd. for  $\text{C}_{27}\text{H}_{25}\text{F}_3\text{N}_2\text{O}_5+\text{H}$ , 515.1794; Found, 515.1794; IR (thin film,  $\text{cm}^{-1}$ ) 3403, 3057, 2959, 1693, 1611, 1483, 1215, 1033; TLC (70:30 petroleum ether/acetone):  $R_f = 0.60$ .

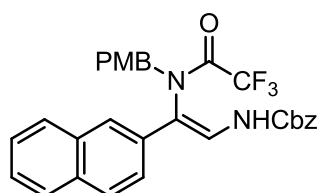

**(Z)-Benzyl (2-(naphthalen-2-yl)-2-(2,2,2-trifluoro-N-(4-methoxybenzyl)acetamido)vinyl) carbamate (11):** The title compound was prepared according to General Procedure B using nitron **S2** (30.5 mg, 0.10 mmol, 1.0 equiv), imidoyl chloride **1** (26.5 mg, 0.1 mmol, 1.0 equiv) and triethylamine (27.9  $\mu\text{L}$ , 0.20 mmol, 2.0 equiv) in  $\text{CH}_2\text{Cl}_2$  (1 mL). Purification by flash chromatography (90:10 hexanes/ethyl acetate) furnished **11** as an off-white solid (21.7 mg, 0.041 mmol, 51%). Analytical data: mp 50-51  $^\circ\text{C}$ ;  $^1\text{H}$  NMR (400 MHz,  $\text{CDCl}_3$ ):  $\delta$  7.84 (q,  $J = 8.4$ , 6.8 Hz, 3H), 7.59 (br s, 1H), 7.52-7.50 (m, 4H), 7.40-7.27 (m, 3H), 6.83 (d,  $J = 8.8$ , 2H), 5.87 (d,  $J = 11.2$  Hz, 1H), 5.61 (d,  $J = 13.6$  Hz, 1H), 5.10 (d,  $J = 12.4$  Hz, 1H), 5.01 (d,  $J = 12.0$  Hz, 1H), 3.84 (d,  $J = 13.6$  Hz, 1H), 3.67 (s, 3H);  $^{13}\text{C}$  NMR (100 MHz,  $\text{CDCl}_3$ ):  $\delta$  160.1, 152.8, 135.2, 133.4, 132.7, 131.0, 130.9, 128.9, 128.6, 128.4, 128.1, 127.8, 127.6, 126.8, 126.3, 123.9, 122.7, 121.6, 118.0, 117.0, 115.1, 114.6, 67.7, 55.2, 51.3; HRMS ( $\text{ESI}^+$ ) Calcd. for  $\text{C}_{30}\text{H}_{25}\text{F}_3\text{N}_2\text{O}_4+\text{H}$ , 535.1845; Found, 535.1838; IR (thin film,  $\text{cm}^{-1}$ ) 3408, 3054, 2986, 2305, 1692, 1659, 1512, 1484, 1265, 1213; TLC (70:30 hexanes/ethyl acetate):  $R_f = 0.51$ .

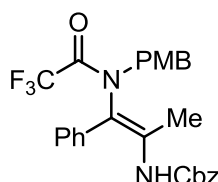

**(E)-Benzyl (1-phenyl-1-(2,2,2-trifluoro-N-(4-methoxybenzyl)acetamido)prop-1-en-2-yl) carbamate (12):** The title compound was prepared according to General Procedure B using nitron **S3** (27 mg, 0.10 mmol, 1.0 equiv), imidoyl chloride **1** (27 mg, 0.10 mmol, 1.0 equiv) and triethylamine (28  $\mu\text{L}$ , 0.20 mmol, 2.0 equiv) in  $\text{CH}_2\text{Cl}_2$  (1 mL). Purification by flash chromatography (90:10 hexanes/ethyl acetate) furnished **12** as a pale yellow oil (31.1 mg, 0.062 mmol, 62%) as a 5.5:1 mixture of inseparable diastereomers. Analytical data:  $^1\text{H}$  NMR (400 MHz,  $\text{CDCl}_3$ ): (Major diastereomer)  $\delta$  7.44-7.28 (m, 10H), 7.24 (d,  $J = 7.2$  Hz, 2H), 6.84 (d,  $J = 8.8$  Hz, 2H), 5.72 (s, 1H), 5.30 (d,  $J = 13.6$  Hz, 1H), 4.98 (d,  $J = 12.4$  Hz, 1H), 4.92 (d,  $J = 12.4$  Hz, 1H), 3.69 (s, 3H), 3.51 (d,  $J = 13.6$  Hz, 1H), 2.31 (s, 3H);  $^{13}\text{C}$  NMR (100 MHz,  $\text{CDCl}_3$ ):  $\delta$  160.0, 152.5, 135.8, 135.5, 133.9, 130.8, 129.8, 129.7, 128.7, 128.6, 128.5, 128.3, 128.1, 127.9, 127.7, 127.5, 119.0, 114.7, 114.1, 66.7, 55.2, 50.1, 16.5; HRMS ( $\text{ESI}^+$ ) Calcd. for  $\text{C}_{27}\text{H}_{25}\text{F}_3\text{N}_2\text{O}_4+\text{Na}$ , 521.1665; Found, 521.1664; IR (thin film,  $\text{cm}^{-1}$ ) 3387, 2593, 1690, 1641, 1512, 1482, 1250, 1167, 1110; TLC (70:30 hexane/ethyl acetate):  $R_f = 0.58$ .

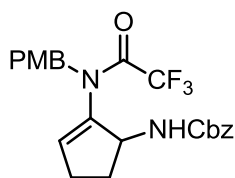

**Benzyl (2-(2,2,2-trifluoro-N-(4-methoxybenzyl)acetamido)cyclopent-2-en-1-yl) carbamate (13):** The title compound was prepared according to General Procedure B using nitron **S4** (38 mg, 0.173 mmol, 1.0 equiv), imidoyl chloride **1** (46 mg, 0.173 mmol, 1.0 equiv) and triethylamine (48  $\mu\text{L}$ , 0.346 mmol, 2.0 equiv) in  $\text{CH}_2\text{Cl}_2$  (2 mL). Purification by flash

chromatography (90:10 petroleum ether/acetone) furnished **13** as a colorless oil (52 mg, 0.116 mmol, 67%). Analytical data:  $^1\text{H NMR}$  (600 MHz,  $\text{CDCl}_3$ ):  $\delta$  7.38-7.34 (m, 5H), 7.18 (d,  $J = 8.4$  Hz, 2H), 6.83 (d,  $J = 9.0$  Hz, 2H), 5.52 (s, 1H), 5.16 (d,  $J = 12.0$  Hz, 1H), 5.07 (d,  $J = 12.0$  Hz, 1H), 5.02-4.98 (m, 1H), 4.68 (d,  $J = 9.6$  Hz, 1H), 4.17 (d,  $J = 14.4$  Hz, 1H), 3.78 (s, 3H), 2.50-2.47 (m, 1H), 2.35-2.30 (m, 1H), 2.20-2.17 (m, 1H), 1.66-1.62 (m, 1H);  $^{13}\text{C NMR}$  (150 MHz,  $\text{CDCl}_3$ ):  $\delta$  159.3, 155.9, 137.7, 136.1, 132.9, 130.1, 128.6, 128.5, 128.4, 128.1, 127.2, 113.9, 68.1, 67.1, 55.2, 54.0, 49.1, 30.9, 27.1; **HRMS** ( $\text{ESI}^+$ ) Calcd. for  $\text{C}_{23}\text{H}_{23}\text{F}_3\text{N}_2\text{O}_4+\text{Na}$ , 471.1508; Found, 471.1508; **IR** (thin film,  $\text{cm}^{-1}$ ) 3426, 3054, 1691, 1513, 1265, 1207, 1175; **TLC** (70:30 petroleum ether/acetone):  $R_f = 0.80$ .

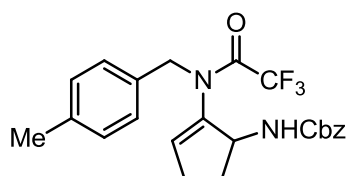

**Benzyl (2-(2,2,2-trifluoro-N-(4-methylbenzyl)acetamido)cyclopent-2-en-1-yl)carbamate (14):** The title compound was prepared according to General Procedure B using nitrone **S5** (20 mg, 0.10 mmol, 1.0 equiv), imidoyl chloride **1** (27 mg, 0.10 mmol, 1.0 equiv) and triethylamine (28  $\mu\text{L}$ , 0.20 mmol, 2.0 equiv) in  $\text{CH}_2\text{Cl}_2$  (1 mL). Purification by flash chromatography (90:10 petroleum ether/acetone) furnished **14** as a colorless oil (34 mg, 0.079 mmol, 79%). Analytical data:  $^1\text{H NMR}$  (400 MHz,  $\text{CDCl}_3$ ):  $\delta$  7.40-7.33 (m, 5H), 7.15-7.10 (m, 4H), 5.55 (s, 1H), 5.16 (d,  $J = 12.4$  Hz, 2H), 5.08 (d,  $J = 12.0$  Hz, 1H), 5.04-4.98 (m, 1H), 4.70 (d,  $J = 9.2$  Hz, 1H), 4.22 (d,  $J = 14.8$ , 1H), 2.51-2.45 (m, 1H), 2.32 (s, 4H), 2.22-2.16 (m, 1H), 1.70-1.60 (m, 1H);  $^{13}\text{C NMR}$  (100 MHz,  $\text{CDCl}_3$ ):  $\delta$  157.0, 156.7, 155.9, 137.8, 137.7, 136.2, 132.9, 132.1, 129.2, 128.7, 128.6, 128.2, 128.0, 67.0, 54.0, 49.5, 30.9, 27.1, 21.1; **HRMS** ( $\text{ESI}^+$ ) Calcd. for  $\text{C}_{21}\text{H}_{21}\text{ClF}_3\text{N}_2\text{O}_4+\text{H}$ , 433.1739; Found, 433.1741; **IR** (thin film,  $\text{cm}^{-1}$ ) 3439, 3353, 3034, 2950, 2253, 1692, 1513, 1209, 1175; **TLC** (70:30 petroleum ether/acetone):  $R_f = 0.70$ .

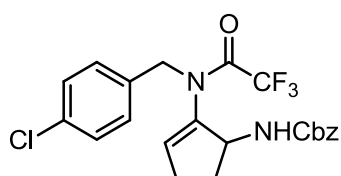

**Benzyl (2-(N-(4-chlorobenzyl)-2,2,2-trifluoroacetamido)cyclopent-2-en-1-yl)carbamate (15):** The title compound was prepared according to General Procedure B using nitrone **S6** (23 mg, 0.10 mmol, 1.0 equiv), imidoyl chloride **1** (27 mg, 0.10 mmol, 1.0 equiv) and triethylamine (28  $\mu\text{L}$ , 0.20 mmol, 2.0 equiv) in  $\text{CH}_2\text{Cl}_2$  (1 mL). Purification by flash chromatography (90:10 hexanes/ethyl acetate) furnished **15** as a colorless oil (31.8 mg, 0.070 mmol, 70%). Analytical data:  $^1\text{H NMR}$  (400 MHz,  $\text{CDCl}_3$ ):  $\delta$  7.38-7.34 (m, 5H), 7.28 (d,  $J = 8.0$  Hz, 2H), 7.19 (d,  $J = 8.0$  Hz, 2H), 5.56 (s, 1H), 5.15 (d,  $J = 12.0$  Hz, 1H), 5.13 (d,  $J = 14.4$  Hz, 1H), 5.07 (d,  $J = 12.0$  Hz, 1H), 5.02-4.96 (m, 1H), 4.69 (d,  $J = 9.2$  Hz, 1H), 4.25 (d,  $J = 14.8$  Hz, 1H), 2.52-2.45 (m, 1H), 2.38-2.32 (m, 1H), 2.24-2.17 (m, 1H), 1.71-1.59 (m, 1H);  $^{13}\text{C NMR}$  (100 MHz,  $\text{CDCl}_3$ ):  $\delta$  157.2, 156.8, 155.9, 137.8, 136.1, 133.9, 133.7, 133.0, 130.1, 128.8, 128.6, 128.3, 128.1, 67.1, 54.0, 49.0, 30.8, 27.2; **HRMS** ( $\text{ESI}^+$ ) Calcd. for  $\text{C}_{22}\text{H}_{20}\text{ClF}_3\text{N}_2\text{O}_3+\text{H}$ , 453.1194; Found, 453.1191; **IR** (thin film,  $\text{cm}^{-1}$ ) 3431, 2096, 1690, 1641, 1512, 1265, 1207, 1157, 1051; **TLC** (70:30 hexanes/ethyl acetate):  $R_f = 0.48$ .

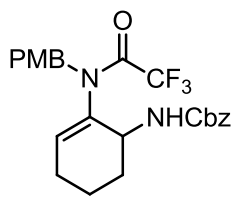

**Benzyl (2-(2,2,2-trifluoro-N-(4-methoxybenzyl)acetamido)cyclohex-2-en-1-yl)carbamate (16):** The title compound was prepared according to General Procedure B using nitrone **S7** (23 mg, 0.10 mmol, 1.0 equiv), imidoyl chloride **1** (27 mg, 0.10 mmol, 1.0 equiv) and triethylamine (28  $\mu$ L, 0.20 mmol, 2.0 equiv) in  $\text{CH}_2\text{Cl}_2$  (1 mL). Purification by flash chromatography (90:10 petroleum ether/acetone) furnished **16** as a pale yellow oil (32 mg, 0.069 mmol, 69%). Analytical data:  $^1\text{H NMR}$  (600 MHz,  $\text{CDCl}_3$ ):  $\delta$  7.40-7.33 (m, 8H), 7.20 (d,  $J = 8.4$  Hz, 2H), 6.83 (d,  $J = 8.4$  Hz, 2H), 5.41 (s, 1H), 5.29 (d,  $J = 10.8$  Hz, 1H), 5.25 (d,  $J = 14.4$  Hz, 1H), 5.16 (d,  $J = 12.6$  Hz, 1H), 5.06 (d,  $J = 12.0$  Hz, 1H), 4.75 (d,  $J = 9.6$  Hz, 1H), 4.62-4.59 (m, 1H), 4.04 (d,  $J = 14.4$  Hz, 1H), 3.79 (s, 3H), 2.04 (t,  $J = 16.8$  Hz, 2H), 1.94 (d,  $J = 18.0$  Hz, 1H), 1.62-1.59 (m, 3H);  $^{13}\text{C NMR}$  (150 MHz,  $\text{CDCl}_3$ ):  $\delta$  159.2, 156.1, 136.1, 133.4, 132.9, 130.6, 128.6, 128.5, 128.3, 128.1, 127.3, 113.8, 67.1, 55.2, 49.0, 46.1, 30.6, 24.7, 19.9; **LRMS (ESI<sup>+</sup>)** Calcd. for  $\text{C}_{24}\text{H}_{25}\text{F}_3\text{N}_2\text{O}_4 + \text{H}$ , 463.18; Found, 463.22; **IR** (thin film,  $\text{cm}^{-1}$ ) 3356, 3064, 2948, 1691, 1512, 1454, 1323, 1208, 1177; **TLC** (80:20 petroleum ether/acetone):  $R_f = 0.30$ .

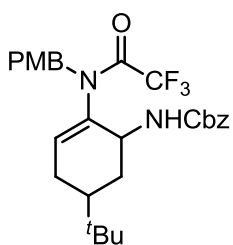

**Benzyl (5-(tert-butyl)-2-(2,2,2-trifluoro-N-(4-methoxybenzyl)acetamido)cyclohex-2-en-1-yl) carbamate (17):** The title compound was prepared according to General Procedure B using nitrone **S8** (30.5 mg, 0.10 mmol, 1.0 equiv), imidoyl chloride **1** (26.5 mg, 0.01 mmol, 1.0 equiv) and triethylamine (27.9  $\mu$ L, 0.20 mmol, 2.0 equiv) in  $\text{CH}_2\text{Cl}_2$  (1 mL). Purification by flash chromatography (90:10 hexanes/ethyl acetate) furnished **17** as an off-white solid (21.7 mg, 0.041 mmol, 51%) as a 1.5:1 mixture of separable diastereomers. Analytical data:  $^1\text{H NMR}$  (600 MHz,  $\text{CDCl}_3$ ): (Major Diastereomer)  $\delta$  7.37-7.34 (m, 5H), 7.17 (d,  $J = 6.6$  Hz, 2H), 7.10 (d,  $J = 8.4$  Hz, 1H), 6.83 (d,  $J = 7.2$  Hz, 3H), 5.52 (br s, 1H), 5.14 (d,  $J = 12.0$  Hz, 1H), 5.08 (d,  $J = 13.2$  Hz, 1H), 5.00-4.66 (m, 1H), 4.66 (br s, 1H), 4.15 (d,  $J = 15.0$  Hz, 1H), 3.79 (s, 3H), 3.12-3.10 (m, 1H), 2.10-2.07 (m, 1H), 1.97-1.95 (m, 1H), 1.72-1.68 (m, 1H), 1.40-1.30 (m, 1H), 1.20-1.15 (m, 1H), 0.85 (s, 9H); (Minor Diastereomer)  $\delta$  7.39-7.35 (m, 5H), 7.21 (d,  $J = 8.4$  Hz, 2H), 6.84 (d,  $J = 8.4$  Hz, 2H), 5.38-5.36 (m, 1H), 5.22 (d,  $J = 14.4$  Hz, 1H), 5.17 (d,  $J = 12.0$  Hz, 1H), 5.06 (d,  $J = 12.0$  Hz, 1H), 4.64 (s, 2H), 3.99 (d,  $J = 14.4$  Hz, 1H), 3.80 (s, 3H), 2.20 (d,  $J = 12.0$  Hz, 1H), 1.99-1.96 (m, 1H), 1.83-1.78 (m, 1H), 1.42-1.41 (m, 1H), 1.21-1.17 (m, 1H), 0.86 (s, 9H);  $^{13}\text{C NMR}$  (150 MHz,  $\text{CDCl}_3$ ): (Minor Diastereomer)  $\delta$  159.2, 156.2, 136.1, 133.7, 132.2, 130.6, 128.6, 128.3, 128.1, 127.4, 113.8, 67.2, 55.2, 49.1, 48.1, 43.2, 32.6, 32.1, 26.9, 26.3; **HRMS (ESI<sup>+</sup>)** Calcd. for  $\text{C}_{28}\text{H}_{33}\text{F}_3\text{N}_2\text{O}_4 + \text{Na}$ , 541.2291; Found, 541.2290; **IR** (thin film,  $\text{cm}^{-1}$ ) 3487, 3035, 2962, 1803, 1712, 1612, 1498, 1455, 1251; **TLC** (70:30 hexanes/ethyl acetate):  $R_f = 0.49$ .

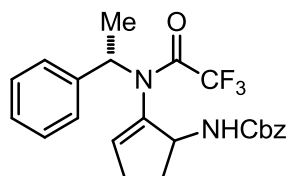

**Benzyl (2-(2,2,2-trifluoro-N-((S)-1-phenylethyl)acetamido)cyclopent-2-en-1-yl)carbamate (18):** The title compound was prepared according to General Procedure B using nitrone **S9** (40 mg, 0.20 mmol, 1.0 equiv), imidoyl chloride **1** (53 mg, 0.20 mmol, 1.0 equiv) and triethylamine (56  $\mu$ L, 0.40 mmol, 2.0 equiv) in  $\text{CH}_2\text{Cl}_2$  (2 mL). Purification by flash chromatography (90:10 hexanes/ethyl acetate) furnished **18** as a pale yellow oil which was a 1:1 mixture of separable diastereomers (Diastereomer 1: 20.2 mg, 0.047 mmol,

23%; Diastereomer 2: 19 mg, 0.043, 22%). Analytical data:  $^1\text{H NMR}$  (400 MHz,  $\text{CDCl}_3$ ): (Diastereomer 1)  $\delta$  7.38-7.31 (m, 10H), 5.73-5.68 (m, 1H), 5.48 (br s, 1H), 5.13 (d,  $J = 12.4$  Hz, 1H), 5.09 (d,  $J = 8.4$  Hz, 1H), 4.84 (d,  $J = 7.2$  Hz, 1H), 2.35-2.21 (m, 2H), 1.99 (br s, 1H), 1.63 (d,  $J = 7.2$  Hz, 3H), 1.59-1.48 (m, 1H); (Diastereomer 2)  $\delta$  7.39-7.27 (m, 10H), 5.84 (s, 1H), 5.45-5.40 (m, 1H), 5.01 (s, 2H), 4.60 (br s, 1H), 4.30 (br s, 1H), 2.38-2.30 (m, 4H), 1.62 (d,  $J = 6.8$  Hz, 3H);  $^{13}\text{C NMR}$  (150 MHz,  $\text{CDCl}_3$ ): (Diastereomer 1) 156.6, 156.4, 155.9, 138.1, 136.8, 136.2, 135.9, 128.6, 128.4, 128.3, 128.2, 67.0, 56.5, 32.1, 26.8, 16.3; (Diastereomer 2)  $\delta$  155.3, 138.3, 137.5, 136.2, 134.8, 128.5, 128.2, 128.1, 127.6, 66.8, 56.4, 55.2, 32.0, 27.1, 16.4; **HRMS (ESI<sup>+</sup>)** Calcd. for  $\text{C}_{23}\text{H}_{23}\text{F}_3\text{N}_2\text{O}_3+\text{H}$ , 433.1740; Found, 433.1750; **IR** (thin film,  $\text{cm}^{-1}$ ) 3422, 3054, 2986, 2305, 1685, 1508, 1420, 1265, 1206, 1155; **TLC** (70:30 hexane/ethyl acetate):  $R_f =$  Diastereomer 1: 0.55; Diastereomer 2: 0.45.

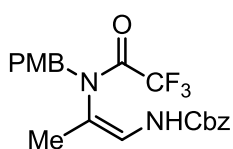

**(Z)-Benzyl (2-(2,2,2-trifluoro-N-(4-methoxybenzyl)acetamido) prop-1-en-1-yl)carbamate (19):** The title compound was prepared according to General Procedure B using nitron **S10** (20 mg, 0.10 mmol, 1.0 equiv), imidoyl chloride **1** (27 mg, 0.10 mmol, 1.0 equiv) and triethylamine (28  $\mu\text{L}$ , 0.20 mmol, 2.0 equiv) in  $\text{CH}_2\text{Cl}_2$  (1 mL). Purification by flash chromatography (95:5 to 90:10 petroleum ether/acetone) furnished **19** as a pale yellow oil (19 mg, 0.045 mmol, 45%). Analytical data:  $^1\text{H NMR}$  (600 MHz,  $\text{CDCl}_3$ ):  $\delta$  7.37-7.29 (m, 3H), 7.24 (d,  $J = 7.2$  Hz, 2H), 6.83 (d,  $J = 8.4$  Hz, 2H), 6.52 (d,  $J = 10.8$  Hz, 1H), 5.62 (d,  $J = 11.4$  Hz, 1H), 5.12 (d,  $J = 13.8$  Hz, 1H), 5.03 (d,  $J = 12.0$  Hz, 1H), 4.96 (d,  $J = 12.0$ , 1H), 4.02 (d,  $J = 13.8$  Hz, 1H), 3.68 (s, 3H), 1.85 (s, 3H);  $^{13}\text{C NMR}$  (150 MHz,  $\text{CDCl}_3$ ):  $\delta$  159.9, 152.7, 135.4, 130.7, 128.6, 128.3, 127.9, 127.8, 123.7, 114.4, 113.7, 67.4, 55.2, 49.8, 18.9; **HRMS (ESI<sup>+</sup>)** Calcd. for  $\text{C}_{21}\text{H}_{21}\text{ClF}_3\text{N}_2\text{O}_4+\text{Na}$ , 445.1351; Found, 445.1354; **IR** (thin film,  $\text{cm}^{-1}$ ) 3415, 2958, 2253, 1693, 1513, 1213, 1173, 1034; **TLC** (70:30 petroleum ether/acetone):  $R_f = 0.70$ .

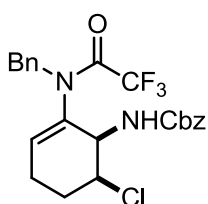

**Benzyl (2-(N-benzyl-2,2,2-trifluoroacetamido)-1-chlorocyclohex-2-en-1-yl)carbamate (20):** The title compound was prepared according to General Procedure B using nitron **S11**<sup>6</sup> (23 mg, 0.10 mmol, 1.0 equiv), imidoyl chloride **1** (27 mg, 0.10 mmol, 1.0 equiv) and triethylamine (28  $\mu\text{L}$ , 0.20 mmol, 2.0 equiv) in  $\text{CH}_2\text{Cl}_2$  (1 mL). Purification by flash chromatography (90:10 petroleum ether/acetone) furnished **20** as a pale yellow oil (39 mg, 0.084 mmol, 84%). Analytical data:  $^1\text{H NMR}$  (600 MHz,  $\text{CDCl}_3$ ):  $\delta$  7.39-7.30 (m, 11H), 5.53 (s, 1H), 5.27 (d,  $J = 15.0$  Hz, 1H), 5.19 (d,  $J = 12.0$  Hz, 1H), 5.11 (d,  $J = 6.0$  Hz, 1H), 5.09 (d,  $J = 7.8$  Hz, 1H), 4.90 (d,  $J = 9.0$  Hz, 1H), 4.74-4.67 (m, 1H), 4.11 (d,  $J = 14.4$  Hz, 2H), 2.23 (br s, 1H), 2.16-2.13 (m, 1H), 2.07-2.05 (m, 1H), 2.01-1.96 (m, 1H);  $^{13}\text{C NMR}$  (150 MHz,  $\text{CDCl}_3$ ):  $\delta$  156.1, 135.8, 134.8, 132.8, 130.5, 129.3, 128.8, 128.7, 128.6, 128.6, 128.5, 128.4, 128.1, 127.9, 67.5, 58.9, 53.0, 49.7, 27.6, 22.0; **HRMS (ESI<sup>+</sup>)** Calcd. for  $\text{C}_{23}\text{H}_{22}\text{ClF}_3\text{N}_2\text{O}_3+\text{Na}$ , 467.1271; Found, 467.1361; **IR** (thin film,  $\text{cm}^{-1}$ ) 3439, 3068, 2960, 2253, 1692, 1500, 1442, 1213, 1158; **TLC** (70:30 petroleum ether/acetone):  $R_f = 0.50$ .

## <sup>1</sup>H NOESY analysis of 20:

The *cis* chloro/amino stereochemistry was supported by NOESY spectroscopy. The β-methine (R<sub>2</sub>CHCl) showed two nOe's: a strong interaction (a) with the amino methine (RNHCbz), and interaction (b) with the allylic methine proton (R<sub>2</sub>CHNHCbz). Additionally, the allylic methine displayed an interaction (c) with the γ-alkyl methylene, an interaction that would not be observed if the allylic methine occupied the pseudoequatorial position – the only orientation that would support a *trans* relationship based upon the dual nOe observed with the β-methine (R<sub>2</sub>CHCl).

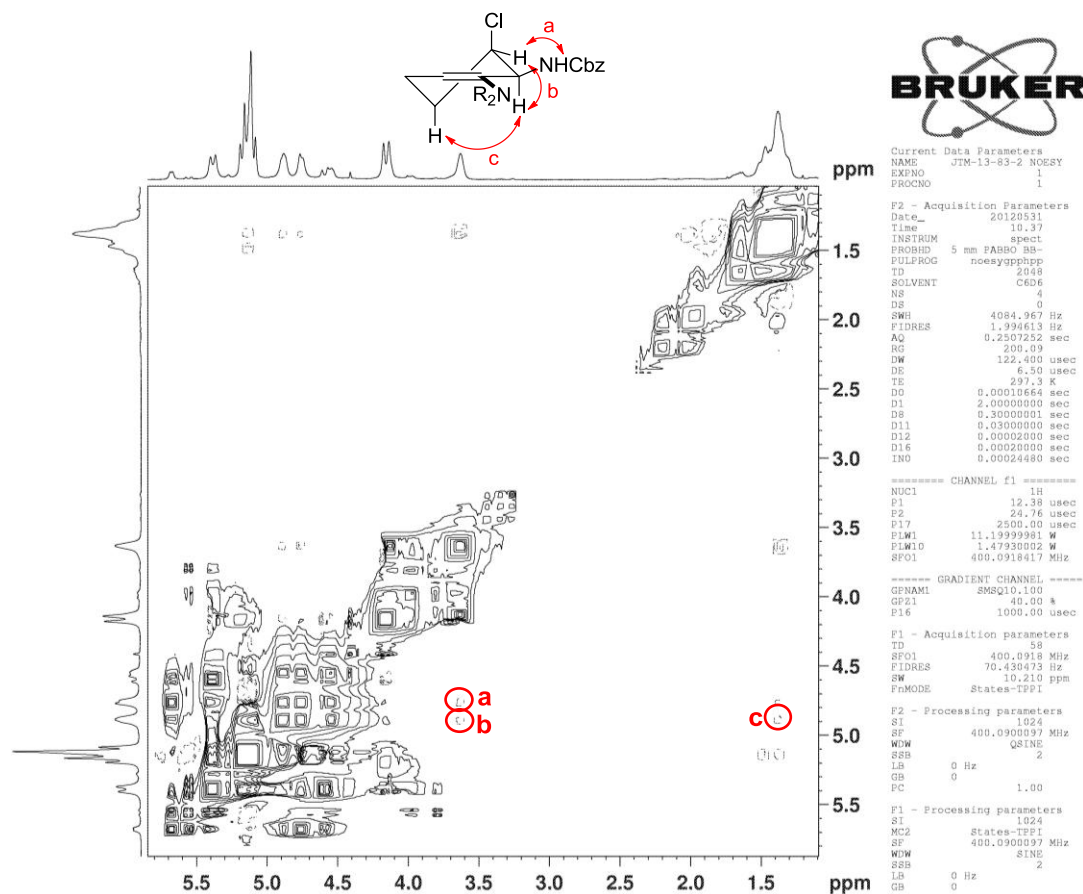

## Secondary Transformations:

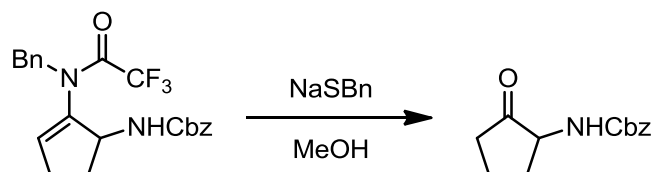

**Benzyl (2-oxocyclopentyl)carbamate (21):** A oven-dried 4-mL vial equipped with magnetic stir bar was charged with  $\alpha$ -amino enamide **3** (0.065 g, 0.15 mmol, 1.0 equiv). Methanol (1.0 mL) was added, followed by freshly prepared sodium benzylthiolate (0.112 g, 0.77 mmol, 5.0 equiv). The vial was sealed with a Teflon-lined cap and the reaction was stirred at rt for 14 h. Volatiles were removed *in vacuo* and the crude product was purified via flash chromatography (90:10 to 80:20 petroleum ether/acetone) to provide **21** as a pale yellow oil (29 mg, 85%). Analytical data:  $^1\text{H NMR}$  (600 MHz,  $\text{CDCl}_3$ ):  $\delta$  7.38-7.31 (m, 5H), 5.22 (br s, 1H), 5.11 (s, 2H), 3.99-3.96 (m, 1H), 2.64-2.62 (m, 1H), 2.42 (dd,  $J = 19.8, 9.0$  Hz, 1H), 2.21-2.14 (m, 1H), 2.09-2.04 (m, 1H), 1.86-1.84 (m, 1H), 1.67-1.63 (m, 1H);  $^{13}\text{C NMR}$  (150 MHz,  $\text{CDCl}_3$ ):  $\delta$  214.6, 156.2, 136.2, 128.5, 128.2, 128.1, 67.0, 59.2, 34.8, 30.2, 17.8; **MS** ( $\text{ESI}^+$ ) Calcd. for  $\text{C}_{13}\text{H}_{15}\text{NO}_3 + \text{Na}$ , 256.10; Found, 256.10; **IR** (thin film,  $\text{cm}^{-1}$ ) 3414, 3055, 2978, 2885, 2305, 1719, 1509, 1455, 1266, 1063; **TLC** (60:40 petroleum ether/acetone):  $R_f = 0.40$ .

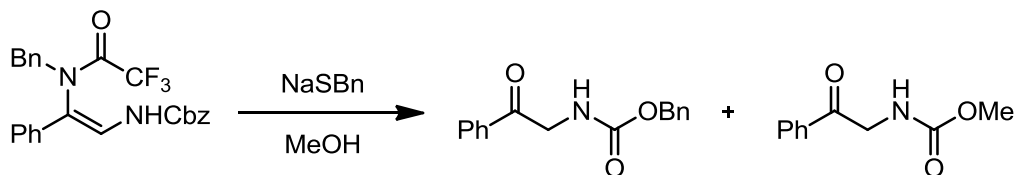

**Benzyl (2-oxo-2-phenylethyl)carbamate and Methyl (2-oxo-2-phenylethyl)carbamate (22):** A oven-dried 20-mL scintillation vial equipped with magnetic stir bar was charged with enediamine **7** (0.160 g, 0.346 mmol, 1.0 equiv). Methanol (4.0 mL) was added, followed by freshly prepared sodium benzylthiolate (0.202 g, 1.38 mmol, 4.0 equiv). The vial was sealed with a Teflon-lined cap and the reaction was stirred at rt for 2 h. Volatiles were removed *in vacuo*. THF (1.5 mL) and 1 M HCl (aq.) were added to the vial and the reaction was allowed to stir at rt for 0.5 h. The organic layer was extracted with  $\text{Et}_2\text{O}$  (3 x 2 mL) and dried with  $\text{MgSO}_4$ . Volatiles were removed *in vacuo* and the crude product was purified via flash chromatography (85:15 to 75:25 hexanes/ethyl acetate) to provide two products. Cbz: colorless oil, 38 mg, 41%, OMe: white solid, 7 mg, 11%. Analytical data: **Cbz Product:**  $^1\text{H NMR}$  (400 MHz,  $\text{CDCl}_3$ ):  $\delta$  7.96 (d,  $J = 7.6$  Hz, 2H), 7.62 (t,  $J = 7.6$  Hz, 1H), 7.49 (t,  $J = 7.6$  Hz, 2H), 5.85 (br s, 1H), 5.16 (s, 2H), 4.73-4.69 (m, 2H);  $^{13}\text{C NMR}$  (100 MHz,  $\text{CDCl}_3$ ):  $\delta$  193.2, 156.2, 136.3, 134.0, 128.9, 128.5, 128.1, 128.0, 127.8, 126.9, 67.0, 47.8; **MS** ( $\text{ESI}^+$ ) Calcd. for  $\text{C}_{16}\text{H}_{15}\text{NO}_3 + \text{H}$ , 270.10; Found, 270.07; **IR** (thin film,  $\text{cm}^{-1}$ ) 3417, 3061, 1692, 1511, 1354, 1266, 1218, 1057; **TLC** (70:30 hexanes/ethyl acetate):  $R_f = 0.30$ . **OMe Product:** mp 77-82  $^\circ\text{C}$ ;  $^1\text{H NMR}$  (400 MHz,  $\text{CDCl}_3$ ):  $\delta$  7.96 (d,  $J = 7.6$  Hz, 2H), 7.62 (t,  $J = 7.6$  Hz, 1H), 7.49 (t,  $J = 7.6$  Hz, 2H), 5.74 (br s, 1H), 4.71 (d,  $J = 4.4$  Hz, 2H), 3.72 (s, 3H);  $^{13}\text{C NMR}$  (100 MHz,  $\text{CDCl}_3$ ):  $\delta$  194.1, 156.9, 134.3, 134.0,

128.9, 127.8, 52.4, 47.8; **MS** (ESI<sup>+</sup>) Calcd. for C<sub>10</sub>H<sub>11</sub>NO<sub>3</sub>+Na, 216.06; Found, 216.01; **IR** (thin film, cm<sup>-1</sup>) 3426, 1692, 1518, 1536, 1265, 737, 701; **TLC** (70:30 hexanes/ethyl acetate): R<sub>f</sub> = 0.20.

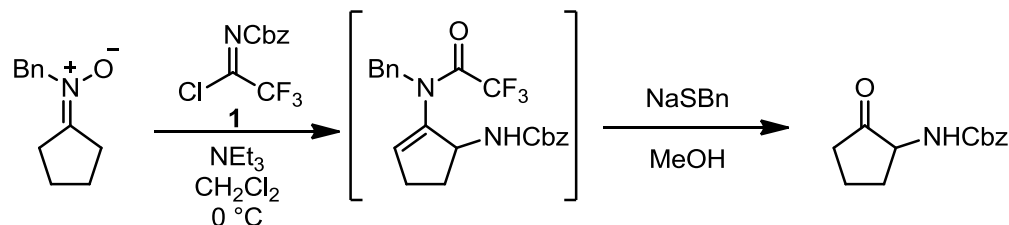

**Benzyl (2-oxocyclopentyl)carbamate (21):** The title compound was prepared according to General Procedure B using nitron **2** (71 mg, 0.377 mmol, 1.0 equiv), imidoyl chloride **1** (100 mg, 0.377 mmol, 1.0 equiv) and triethylamine (100  $\mu$ L, 0.755 mmol, 2.0 equiv) in CH<sub>2</sub>Cl<sub>2</sub> (2 mL). Upon completion, volatiles were removed *in vacuo*. Methanol was immediately added to the vial (3.0 mL) followed by the addition of freshly prepared sodium benzylthiolate (0.165 g, 1.13 mmol, 3.0 equiv). The vial was sealed with a Teflon-lined cap and the reaction was stirred at rt for 14 h. Volatiles were removed *in vacuo* and the crude product was purified via flash chromatography (90:10 to 80:20 petroleum ether/acetone) to provide the desired product as a pale yellow oil (58 mg, 67%).

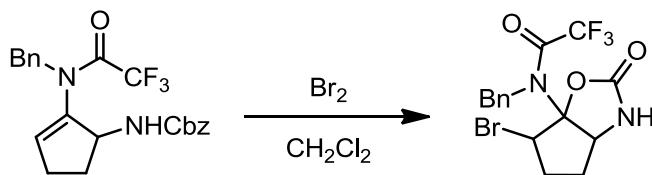

**N-benzyl-N-(6-bromo-2-oxohexahydro-2H-cyclopenta[d]oxazol-6a-yl)-2,2,2-trifluoroacetamide (23):** A oven-dried 4-mL scintillation vial equipped with magnetic stir bar was charged with  $\alpha$ '-amino enamide **3** (0.020 g, 0.048 mmol, 1.0 equiv). The vial was purged with nitrogen and dichloromethane (1.2 mL) was added. Bromine (0.007 mL, 0.14 mmol, 3.0 equiv) was then added dropwise and the reaction was stirred at 23 °C for 45 min. Upon completion, volatiles were removed *in vacuo*. The crude product was purified via flash chromatography (90:10 to 80:20 petroleum ether/acetone) to provide the desired product as a white solid with 2.5:1 diastereomeric ratio (15 mg, 79%). Analytical data: **mp** 176.5-178 °C; **<sup>1</sup>H NMR** (600 MHz, CDCl<sub>3</sub>): (Major Diastereomer)  $\delta$  7.38-7.22 (m, 5H), 6.01 (s, 1H), 5.49 (s, 1H), 5.01 (d, *J* = 19.8 Hz, 1H), 4.68 (d, *J* = 18.0 Hz, 1H), 4.28 (d, *J* = 4.2 Hz, 1H), 2.38-2.21 (m, 3H), 1.66 (d, *J* = 12.6 Hz, 1H); **<sup>13</sup>C NMR** (150 MHz, CDCl<sub>3</sub>): (Major Diastereomer)  $\delta$  156.7, 135.5, 129.1, 128.6, 128.1, 125.5, 116.8, 114.9, 105.2, 57.8, 56.2, 50.6, 32.5, 31.4; **HRMS** (ESI<sup>+</sup>) Calcd. for C<sub>15</sub>H<sub>14</sub>BrF<sub>3</sub>N<sub>2</sub>O<sub>3</sub> +Na, 429.0038; Found, 429.0039; **IR** (thin film, cm<sup>-1</sup>) 3054, 2986, 2305, 1778, 1719, 1292, 1209, 1149, 740; **TLC** (60:40 hexanes/ethyl acetate): R<sub>f</sub> = 0.30.

# <sup>1</sup>H, <sup>13</sup>C NMR Spectra:

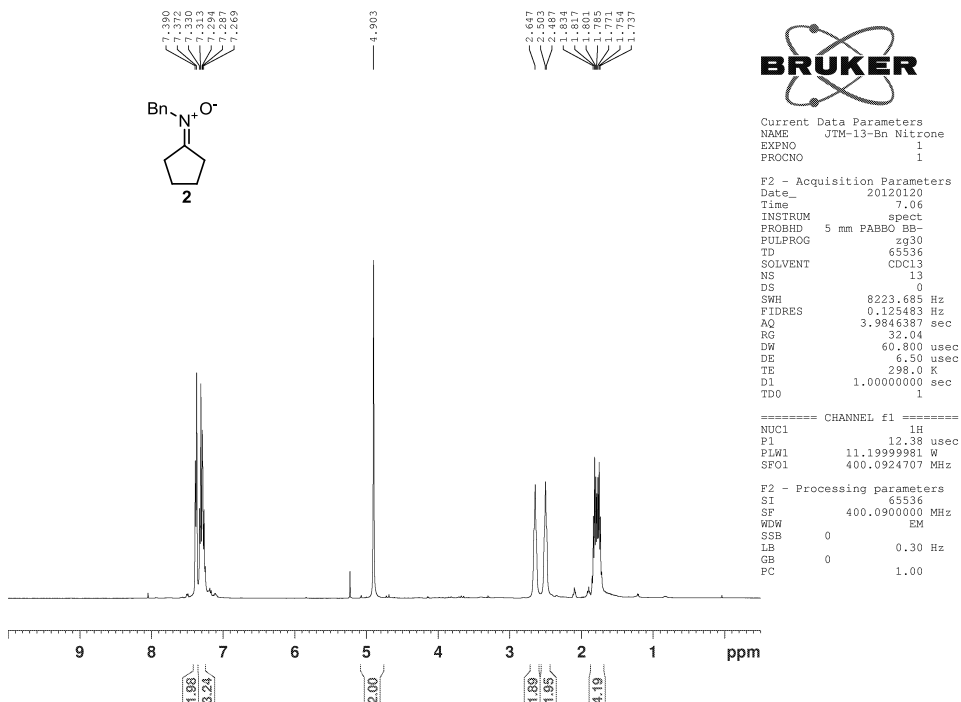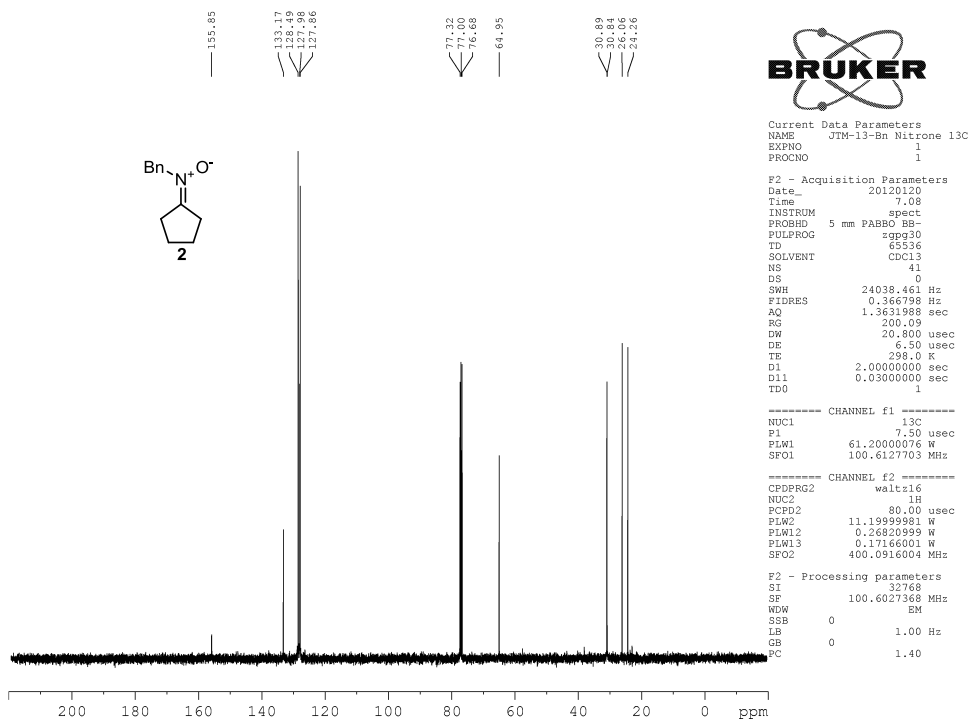



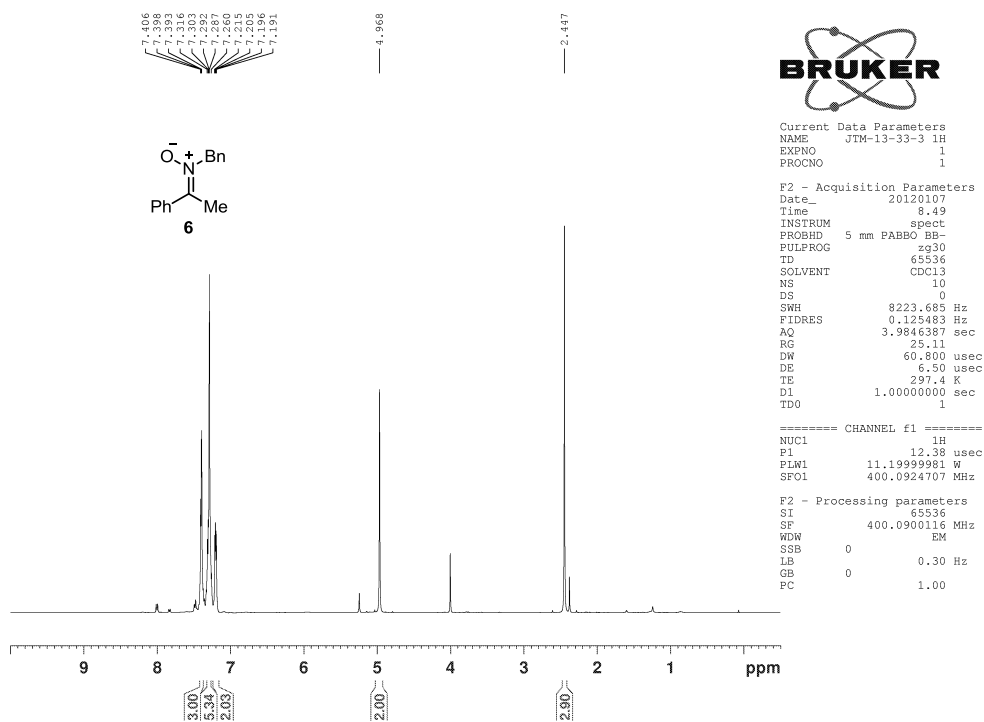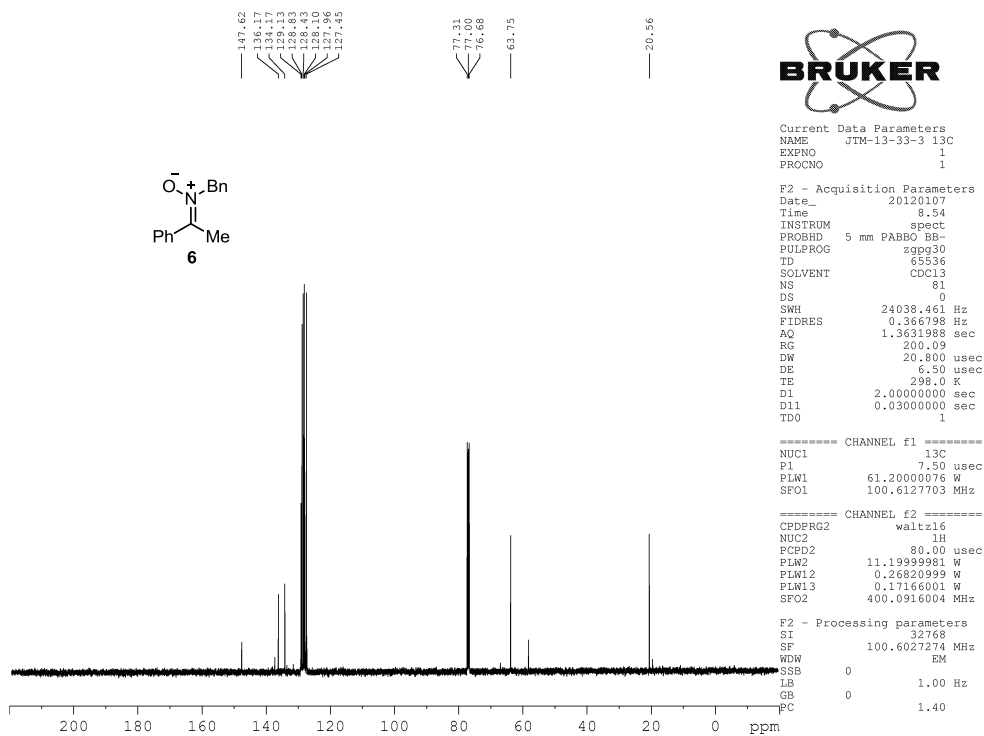

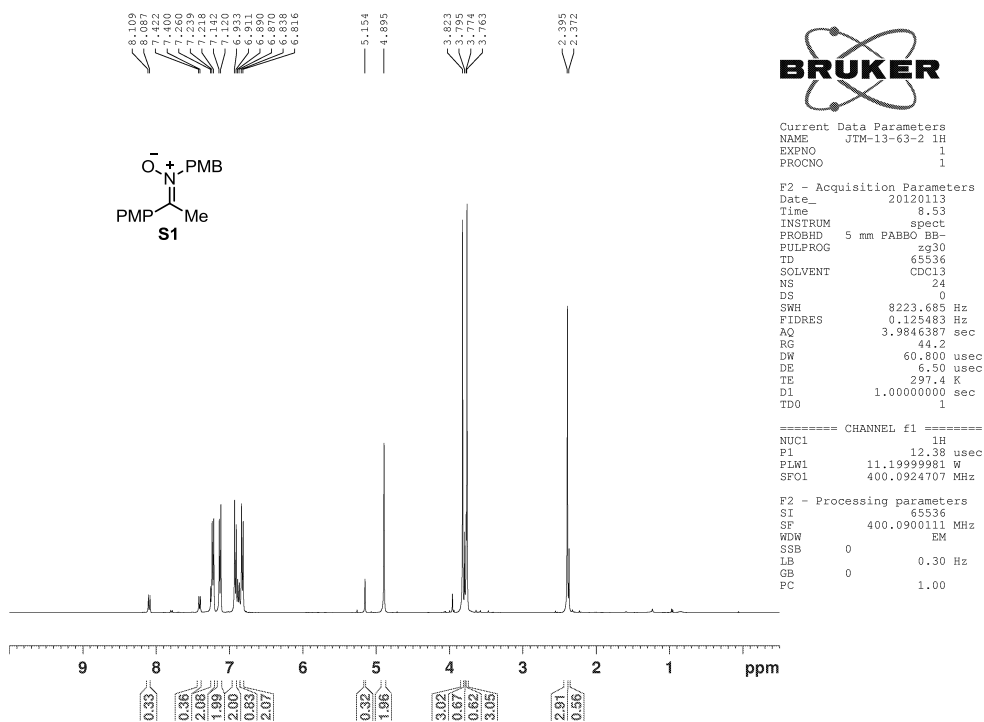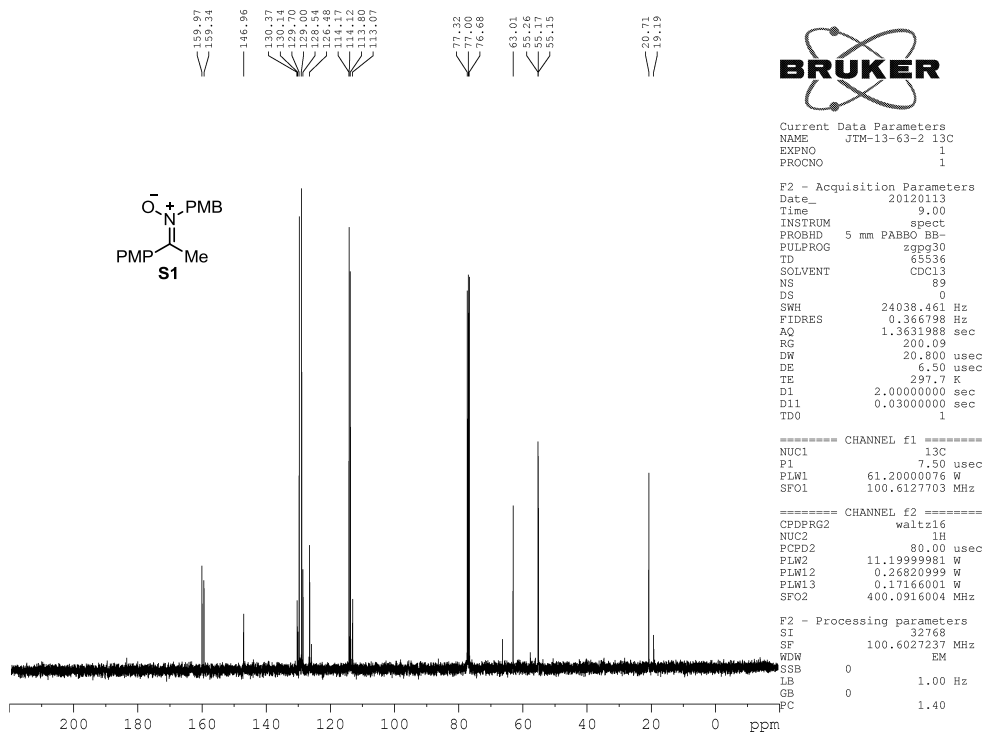

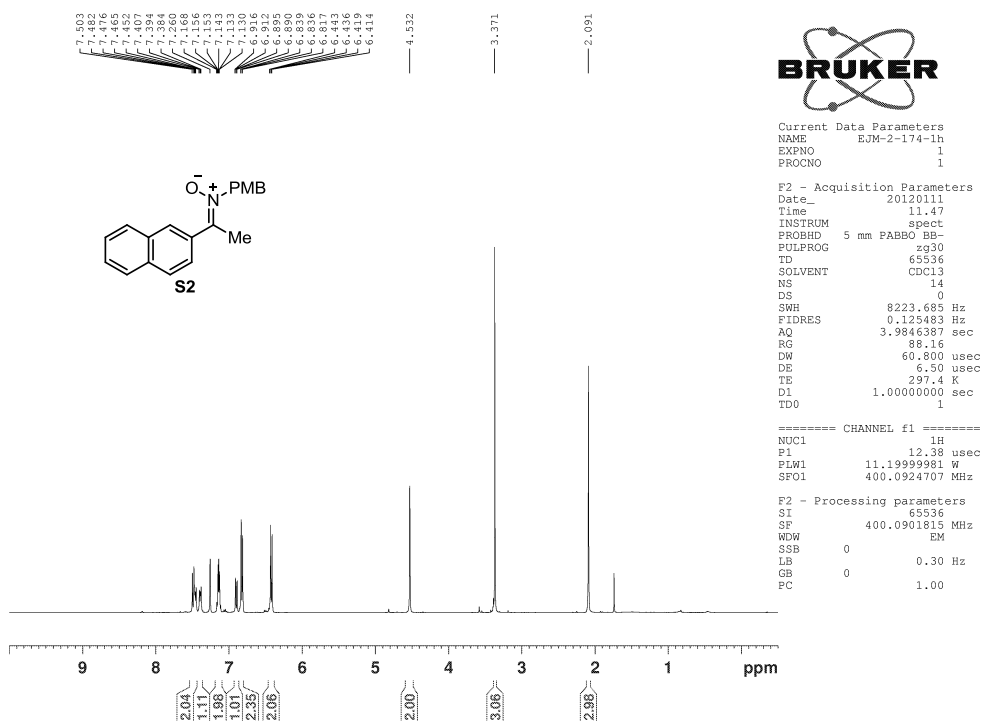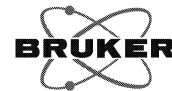

Current Data Parameters  
 NAME EJM-2-174-1h  
 EXPNO 1  
 PROCNO 1

F2 - Acquisition Parameters  
 Date\_ 20120111  
 Time 11.47  
 INSTRUM spect  
 PROBHD 5 mm PABBO BB-  
 PULPROG zg30  
 TD 65536  
 SOLVENT CDCl3  
 NS 14  
 DS 0  
 SWH 8223.685 Hz  
 FIDRES 0.125483 Hz  
 AQ 3.9846387 sec  
 RG 88.16  
 DW 60.800 usec  
 DE 6.50 usec  
 TE 297.4 K  
 D1 1.00000000 sec  
 TD0 1

===== CHANNEL f1 =====  
 NUC1 1H  
 P1 12.38 usec  
 PLW1 11.19999981 W  
 SF01 400.0924707 MHz

F2 - Processing parameters  
 SI 65536  
 SF 400.0901815 MHz  
 WDW EM  
 SSB 0  
 LB 0.30 Hz  
 GB 0  
 PC 1.00

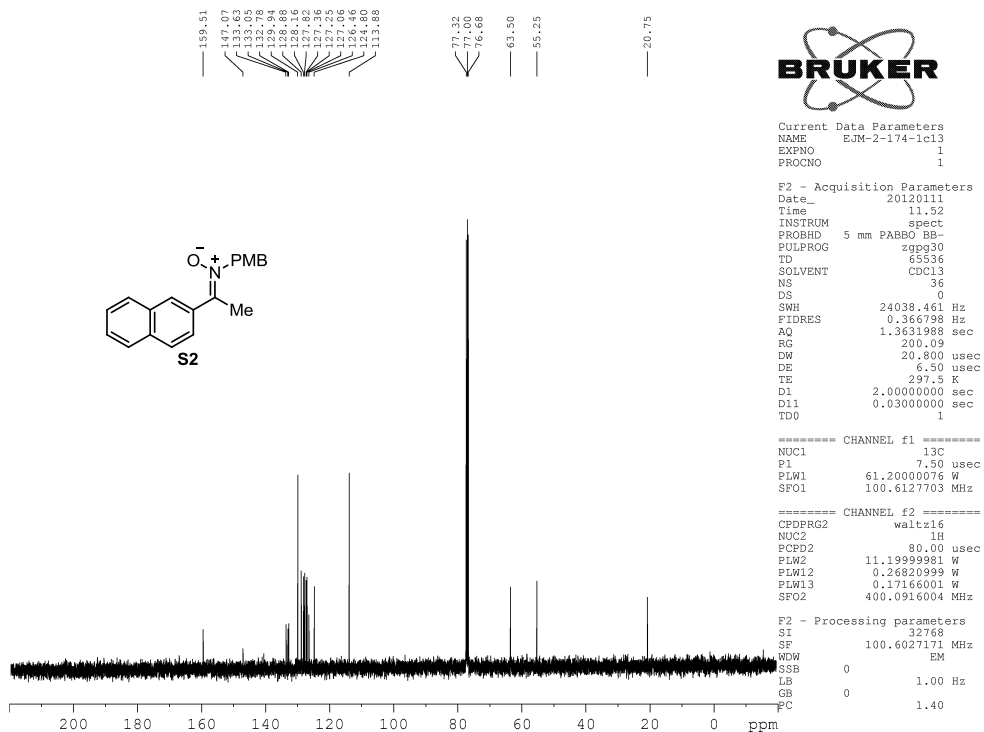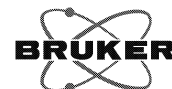

Current Data Parameters  
 NAME EJM-2-174-1c13  
 EXPNO 1  
 PROCNO 1

F2 - Acquisition Parameters  
 Date\_ 20120111  
 Time 11.52  
 INSTRUM spect  
 PROBHD 5 mm PABBO BB-  
 PULPROG zgpg30  
 TD 65536  
 SOLVENT CDCl3  
 NS 36  
 DS 0  
 SWH 24038.461 Hz  
 FIDRES 0.366798 Hz  
 AQ 1.3631988 sec  
 RG 200.09  
 DW 20.800 usec  
 DE 6.50 usec  
 TE 297.5 K  
 D1 2.00000000 sec  
 D11 0.03000000 sec  
 TD0 1

===== CHANNEL f1 =====  
 NUC1 13C  
 P1 7.50 usec  
 PLW1 61.20000076 W  
 SF01 100.6127703 MHz

===== CHANNEL f2 =====  
 CDPGR2 waltz16  
 NUC2 1H  
 PCPD2 80.00 usec  
 PLW2 11.19999981 W  
 PLW12 0.26820999 W  
 PLW13 0.17160001 W  
 SF02 400.0916004 MHz

F2 - Processing parameters  
 SI 32768  
 SF 100.6027171 MHz  
 WDW EM  
 SSB 0  
 LB 1.00 Hz  
 GB 0  
 PC 1.40

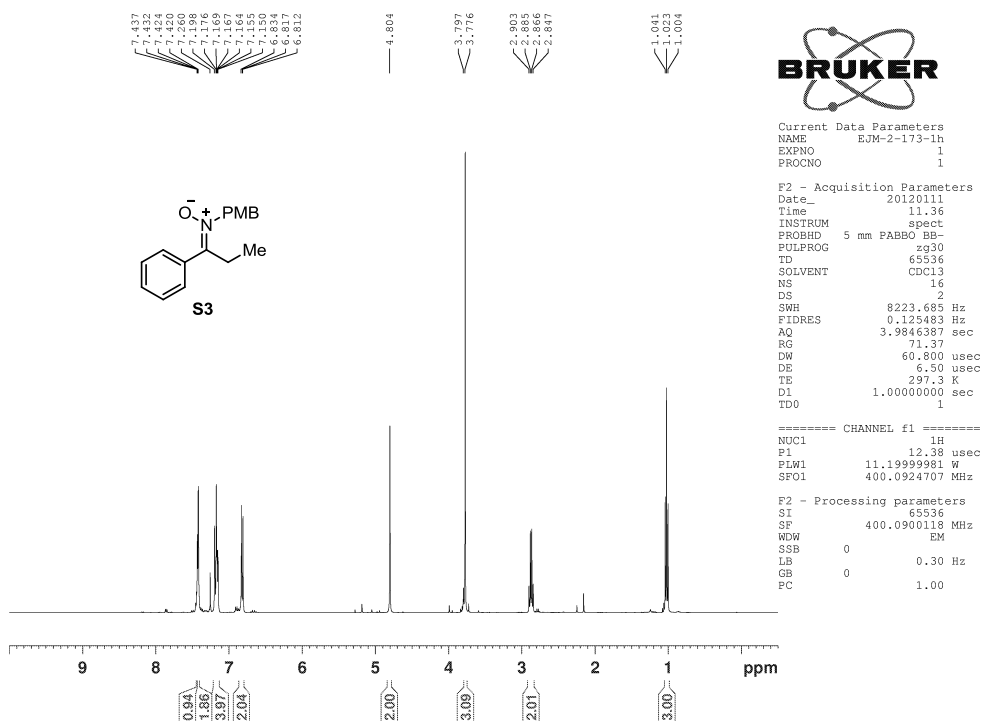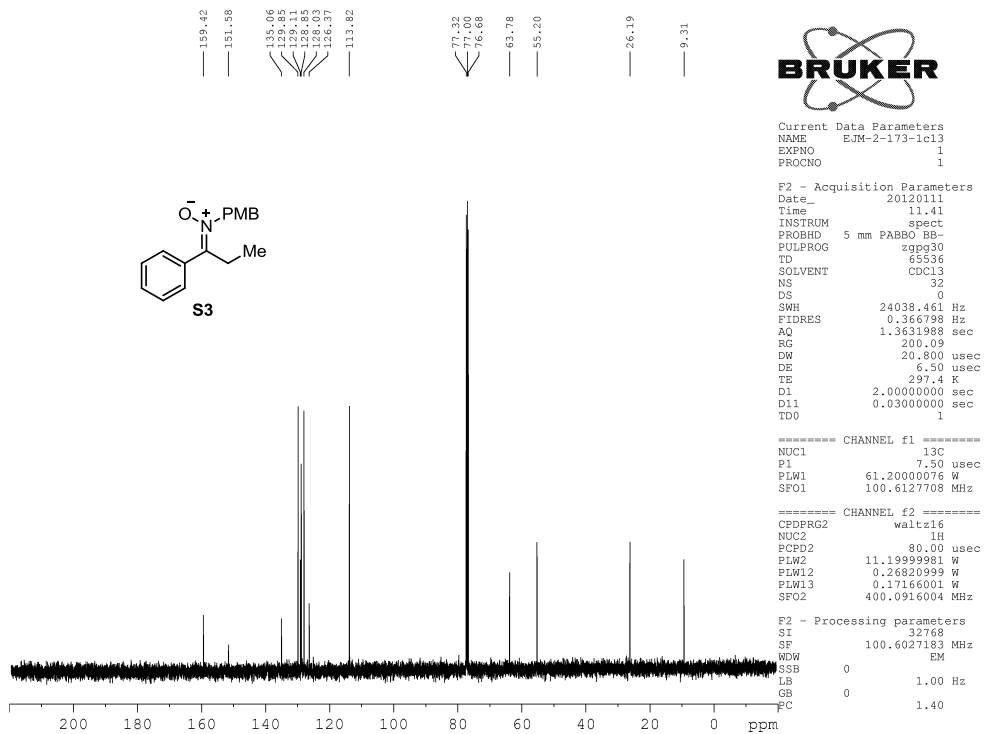

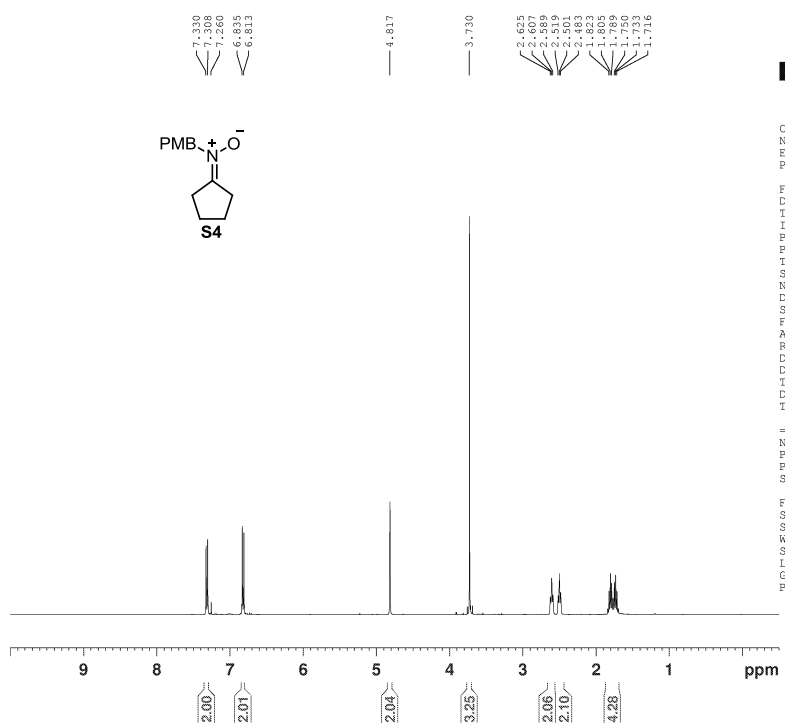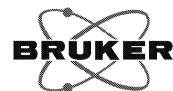

Current Data Parameters  
 NAME JTM-12-249-1a 1H  
 EXPNO 1  
 PROCNO 1

F2 - Acquisition Parameters  
 Date\_ 20111214  
 Time 8.42  
 INSTRUM spect  
 PROBHD 5 mm PABBO BB-  
 PULPROG zg30  
 TD 65536  
 SOLVENT CDCl3  
 NS 15  
 DS 0  
 SWH 8223.685 Hz  
 FIDRES 0.125483 Hz  
 AQ 3.9846387 sec  
 RG 40.18  
 DW 60.800 usec  
 DE 6.50 usec  
 TE 297.7 K  
 D1 1.00000000 sec  
 TDO 1

===== CHANNEL f1 =====  
 NUC1 1H  
 P1 12.38 usec  
 PLW1 11.1999981 W  
 SFO1 400.0924707 MHz

F2 - Processing parameters  
 SI 65536  
 SF 400.0900112 MHz  
 WDW EM  
 SSB 0  
 LB 0.30 Hz  
 GB 0  
 PC 1.00

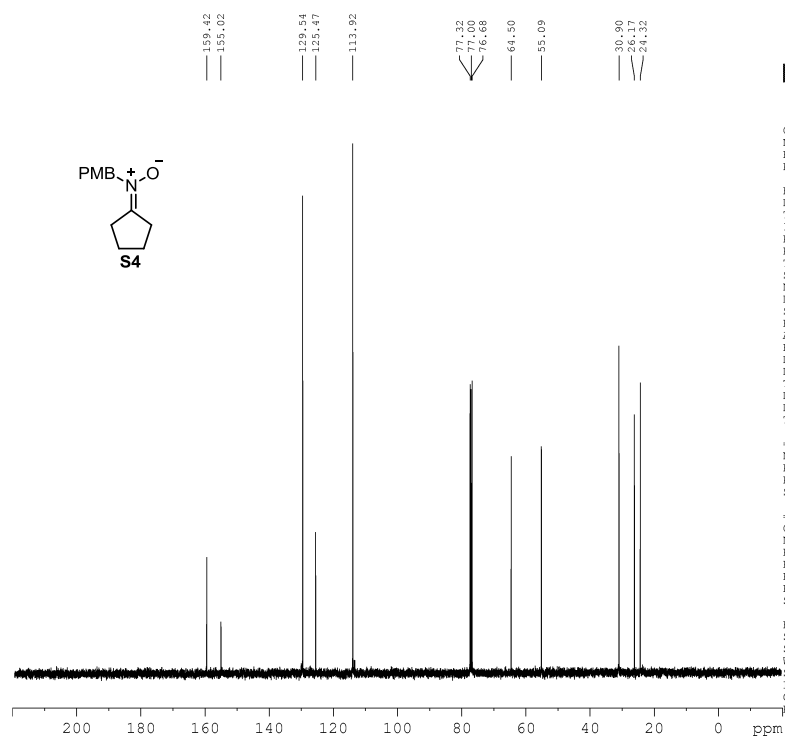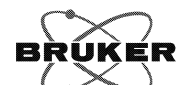

Current Data Parameters  
 NAME JTM-12-249-1a 13C  
 EXPNO 1  
 PROCNO 1

F2 - Acquisition Parameters  
 Date\_ 20111214  
 Time 8.46  
 INSTRUM spect  
 PROBHD 5 mm PABBO BB-  
 PULPROG zgpg30  
 TD 65536  
 SOLVENT CDCl3  
 NS 58  
 DS 0  
 SWH 24038.461 Hz  
 FIDRES 0.366798 Hz  
 AQ 1.3631988 sec  
 RG 200.09  
 DW 20.800 usec  
 DE 6.50 usec  
 TE 298.3 K  
 D1 2.00000000 sec  
 D11 0.03000000 sec  
 TDO 1

===== CHANNEL f1 =====  
 NUC1 13C  
 P1 7.50 usec  
 PLW1 61.20000076 W  
 SFO1 100.6127703 MHz

===== CHANNEL f2 =====  
 CPDPRG2 waltz16  
 NUC2 1H  
 PCPD2 80.00 usec  
 PLM2 11.1999981 W  
 PLM12 0.26820999 W  
 PLM13 0.17166001 W  
 SFO2 400.0916004 MHz

F2 - Processing parameters  
 SI 32768  
 SF 100.6027296 MHz  
 WDW EM  
 SSB 0  
 LB 1.00 Hz  
 GB 0  
 PC 1.40

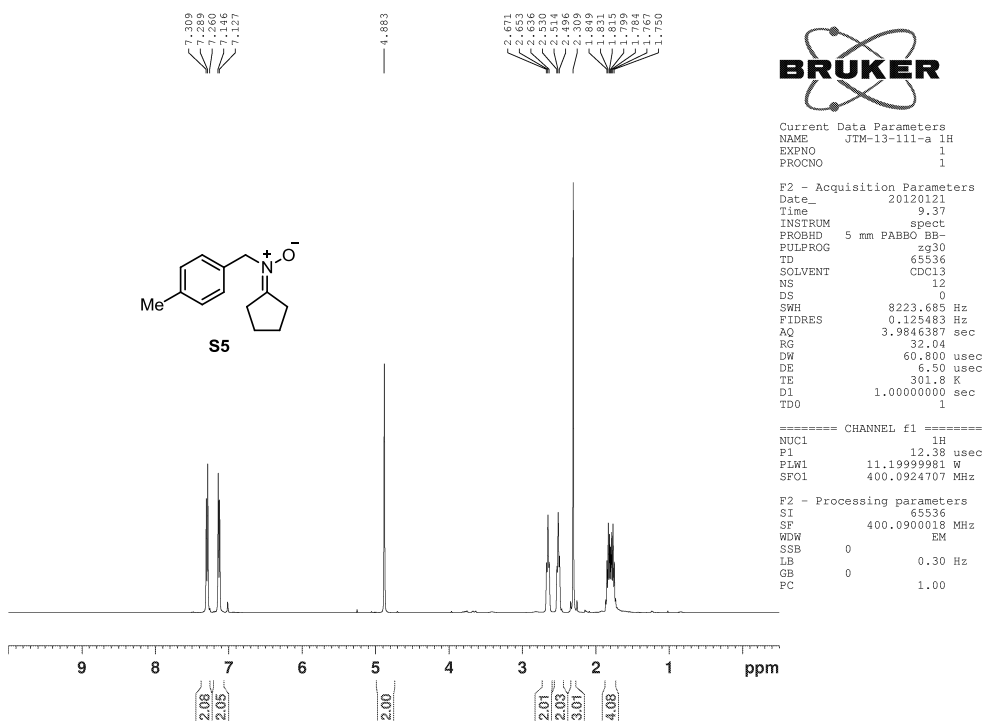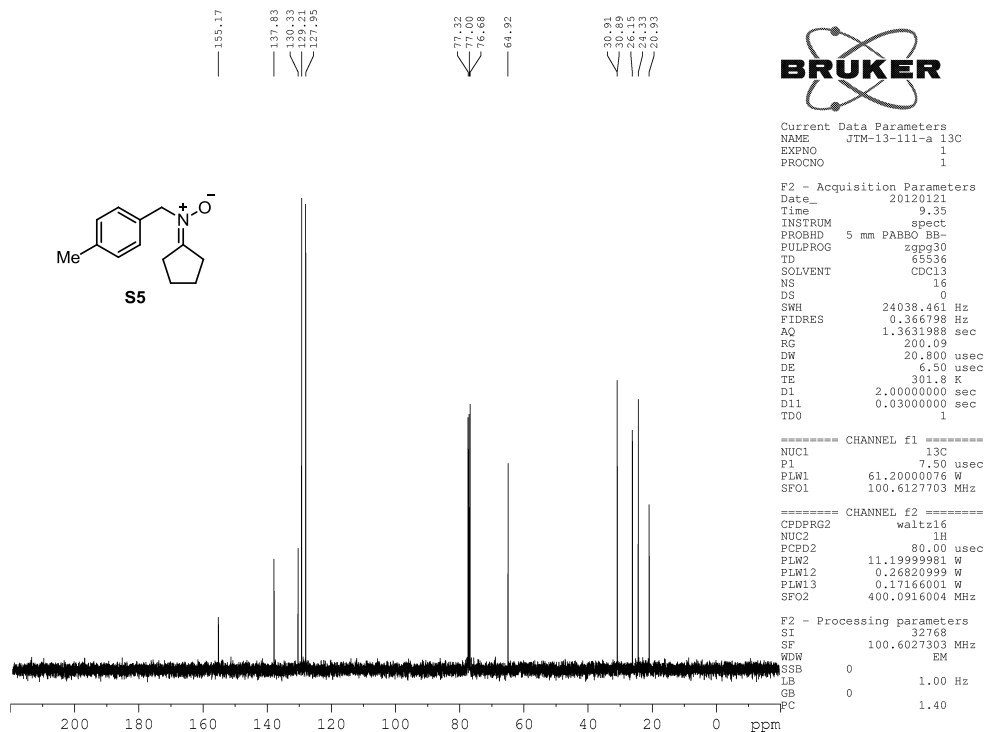

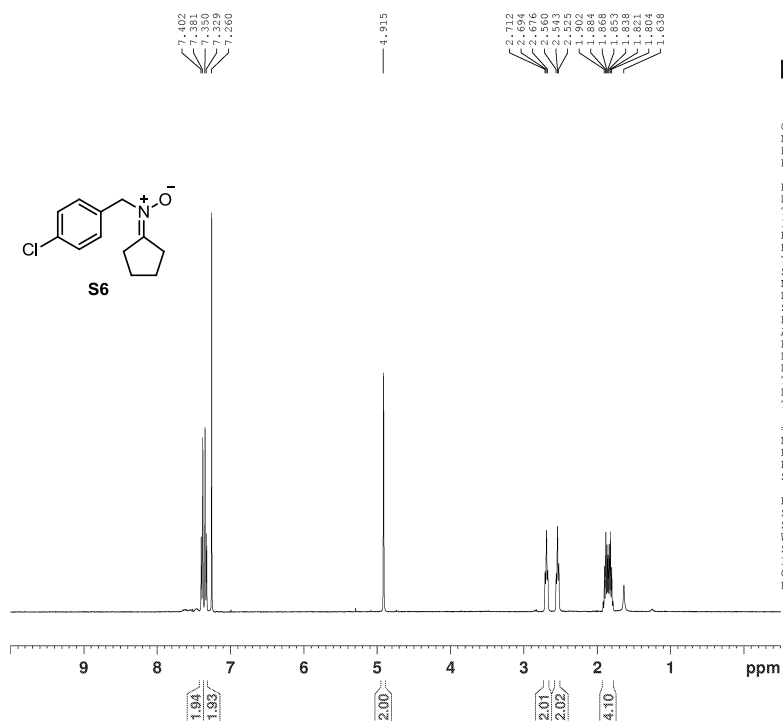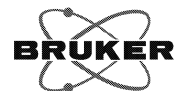

Current Data Parameters  
 NAME EJM-2-194-2b  
 EXPNO 1  
 PROCNO 1

F2 - Acquisition Parameters  
 Date\_ 20120121  
 Time 9.04  
 INSTRUM spect  
 PROBHD 5 mm PABBO BB-  
 PULPROG zg30  
 TD 65536  
 SOLVENT CDCl3  
 NS 14  
 DS 0  
 SWH 8223.685 Hz  
 FIDRES 0.125483 Hz  
 AQ 3.9846387 sec  
 RG 200.09  
 DW 60.800 usec  
 DE 6.50 usec  
 TE 301.4 K  
 D1 1.0000000 sec  
 TD0 1

===== CHANNEL f1 =====  
 NUC1 1H  
 P1 12.38 usec  
 PLW1 11.19999981 W  
 SF01 400.0924707 MHz

F2 - Processing parameters  
 SI 65536  
 SF 400.0900114 MHz  
 WDW EM  
 SSB 0  
 LB 0.30 Hz  
 GB 0  
 PC 1.00

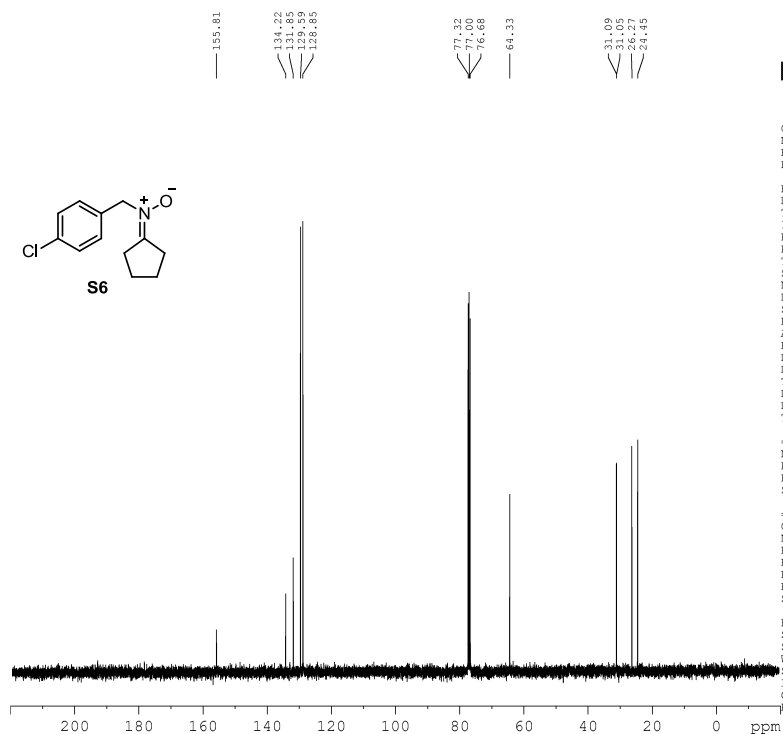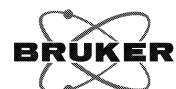

Current Data Parameters  
 NAME EJM-2-194-2c13  
 EXPNO 3  
 PROCNO 1

F2 - Acquisition Parameters  
 Date\_ 20120121  
 Time 12.04  
 INSTRUM spect  
 PROBHD 5 mm PABBO BB-  
 PULPROG zgpg30  
 TD 65536  
 SOLVENT CDCl3  
 NS 52  
 DS 0  
 SWH 24038.461 Hz  
 FIDRES 0.366798 Hz  
 AQ 1.3631988 sec  
 RG 200.09  
 DW 20.800 usec  
 DE 6.50 usec  
 TE 301.7 K  
 D1 2.0000000 sec  
 D11 0.03000000 sec  
 TD0 1

===== CHANNEL f1 =====  
 NUC1 13C  
 P1 7.50 usec  
 PLW1 61.20000076 W  
 SF01 100.6127703 MHz

===== CHANNEL f2 =====  
 CPDPRG2 waltz16  
 NUC2 1H  
 PCPD2 80.00 usec  
 PLM2 11.19999981 W  
 PLM12 0.26820999 W  
 PLM13 0.17166001 W  
 SF02 400.0916004 MHz

F2 - Processing parameters  
 SI 32768  
 SF 100.6027201 MHz  
 WDW EM  
 SSB 0  
 LB 1.00 Hz  
 GB 0  
 PC 1.40

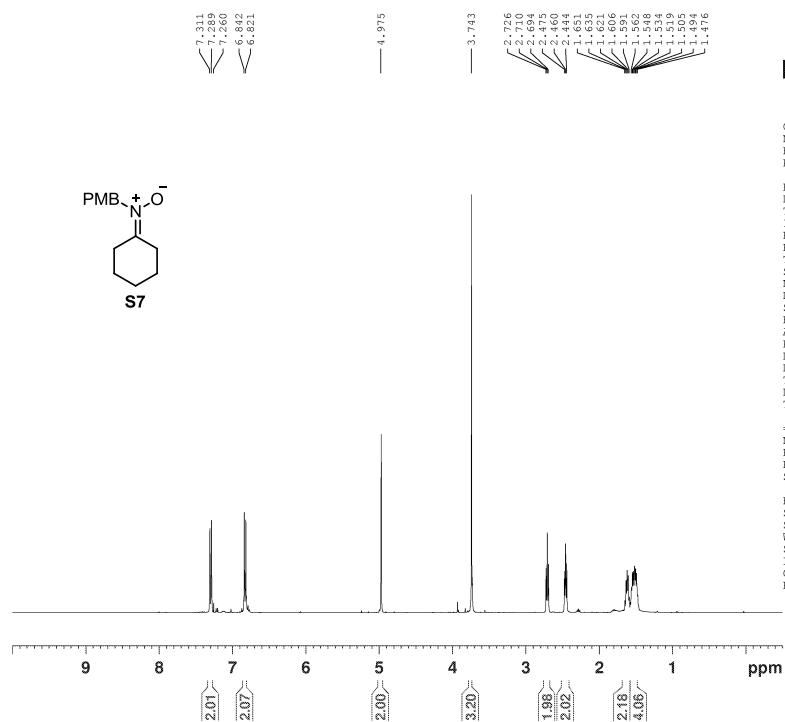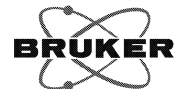

Current Data Parameters  
 NAME JTM-12-263-1b 1H  
 EXPNO 1  
 PROCNO 1

F2 - Acquisition Parameters  
 Date\_ 20111215  
 Time 14.30  
 INSTRUM spect  
 PROBHD 5 mm PABBO BB-  
 PULPROG zg30  
 TD 65536  
 SOLVENT CDCl3  
 NS 13  
 DS 0  
 SWH 8223.685 Hz  
 FIDRES 0.125483 Hz  
 AQ 3.9846387 sec  
 RG 21.94  
 DW 60.800 usec  
 DE 6.50 usec  
 TE 297.2 K  
 D1 1.0000000 sec  
 TD0 1

===== CHANNEL f1 =====  
 NUC1 1H  
 P1 12.38 usec  
 PLW1 11.19999981 W  
 SF01 400.0924707 MHz

F2 - Processing parameters  
 SI 65536  
 SF 400.0900114 MHz  
 WDW EM  
 SSB 0  
 LB 0.30 Hz  
 GB 0  
 PC 1.00

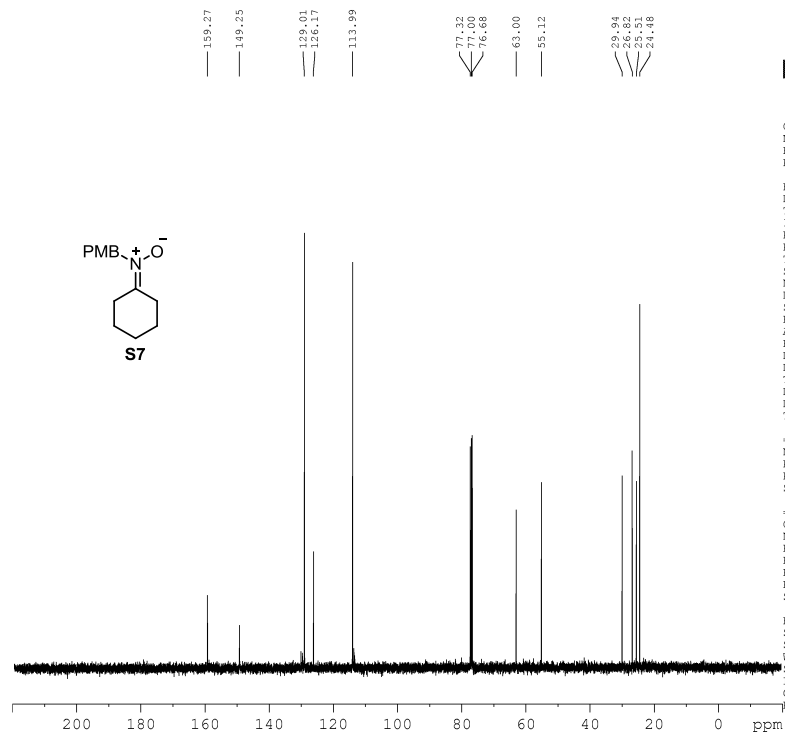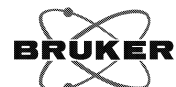

Current Data Parameters  
 NAME JTM-12-263-1b 13C  
 EXPNO 1  
 PROCNO 1

F2 - Acquisition Parameters  
 Date\_ 20111215  
 Time 14.34  
 INSTRUM spect  
 PROBHD 5 mm PABBO BB-  
 PULPROG zgpg30  
 TD 65536  
 SOLVENT CDCl3  
 NS 41  
 DS 0  
 SWH 24038.461 Hz  
 FIDRES 0.366798 Hz  
 AQ 1.3631988 sec  
 RG 200.09  
 DW 20.800 usec  
 DE 6.50 usec  
 TE 297.1 K  
 D1 2.0000000 sec  
 D11 0.03000000 sec  
 TD0 1

===== CHANNEL f1 =====  
 NUC1 13C  
 P1 7.50 usec  
 PLW1 61.20000076 W  
 SF01 100.6127703 MHz

===== CHANNEL f2 =====  
 CPDPRG2 waltz16  
 NUC2 1H  
 PCPD2 80.00 usec  
 PLM2 11.19999981 W  
 PLM12 0.26820999 W  
 PLM13 0.17166001 W  
 SF02 400.0916004 MHz

F2 - Processing parameters  
 SI 32768  
 SF 100.6027252 MHz  
 WDW EM  
 SSB 0  
 LB 1.00 Hz  
 GB 0  
 PC 1.40



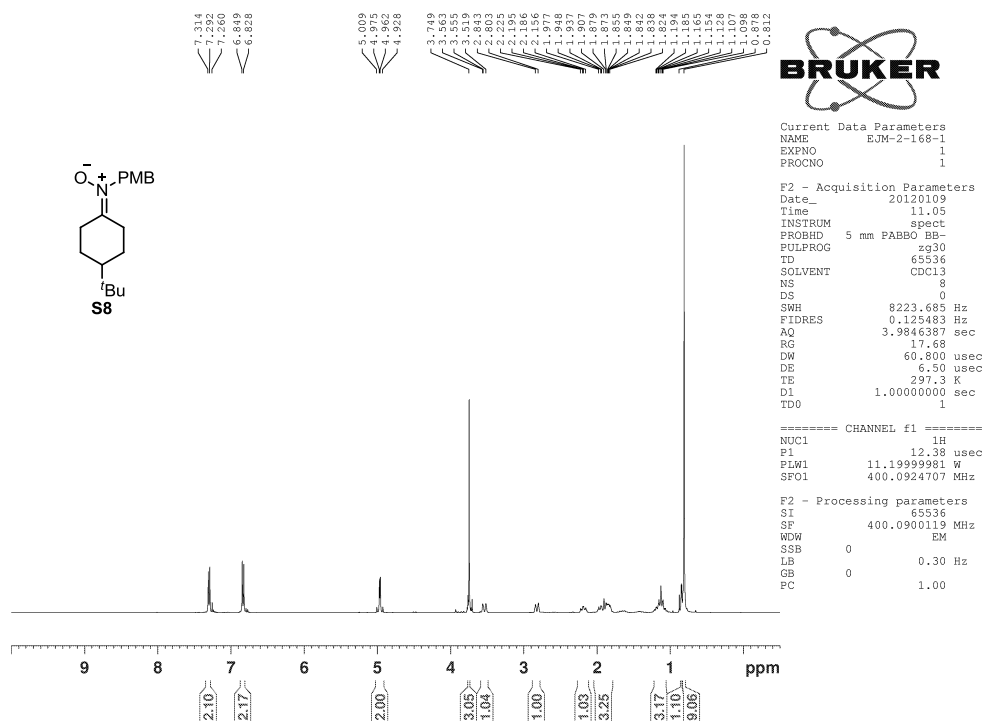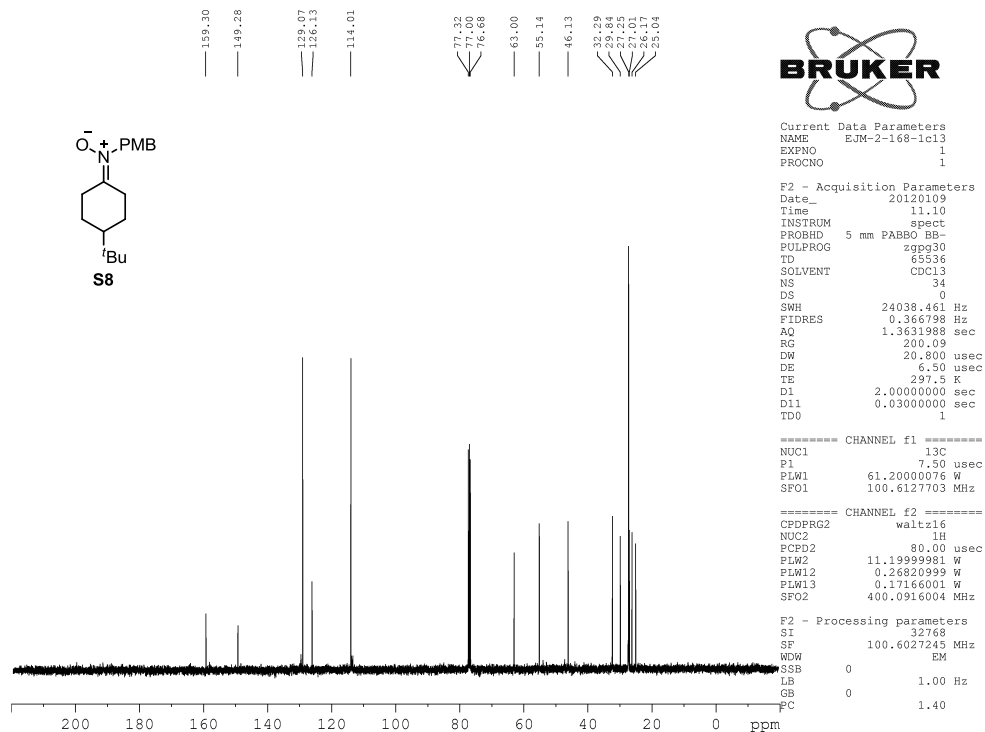

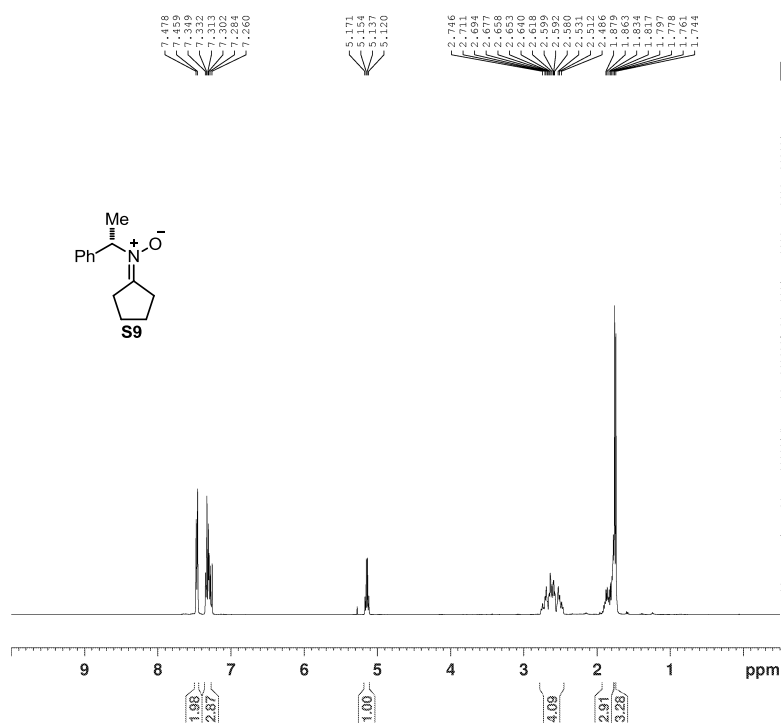

Current Data Parameters  
 NAME EJM-2-199-1  
 EXPNO 1  
 PROCNO 1

F2 - Acquisition Parameters  
 Date\_ 20120124  
 Time 15.45  
 INSTRUM spect  
 PROBHD 5 mm PABBO BB-  
 PULPROG zg30  
 TD 65536  
 SOLVENT CDCl3  
 NS 4  
 DS 0  
 SWH 8223.685 Hz  
 FIDRES 0.125483 Hz  
 AQ 3.9846387 sec  
 RG 88.16  
 DW 60.800 usec  
 DE 6.50 usec  
 TE 301.3 K  
 D1 1.00000000 sec  
 TD0 1

===== CHANNEL f1 =====  
 NUC1 1H  
 P1 12.38 usec  
 PLW1 11.19999981 W  
 SF01 400.0924707 MHz

F2 - Processing parameters  
 SI 65536  
 SF 400.0900117 MHz  
 WW EM  
 SSB 0  
 LB 0.30 Hz  
 GB 0  
 PC 1.00

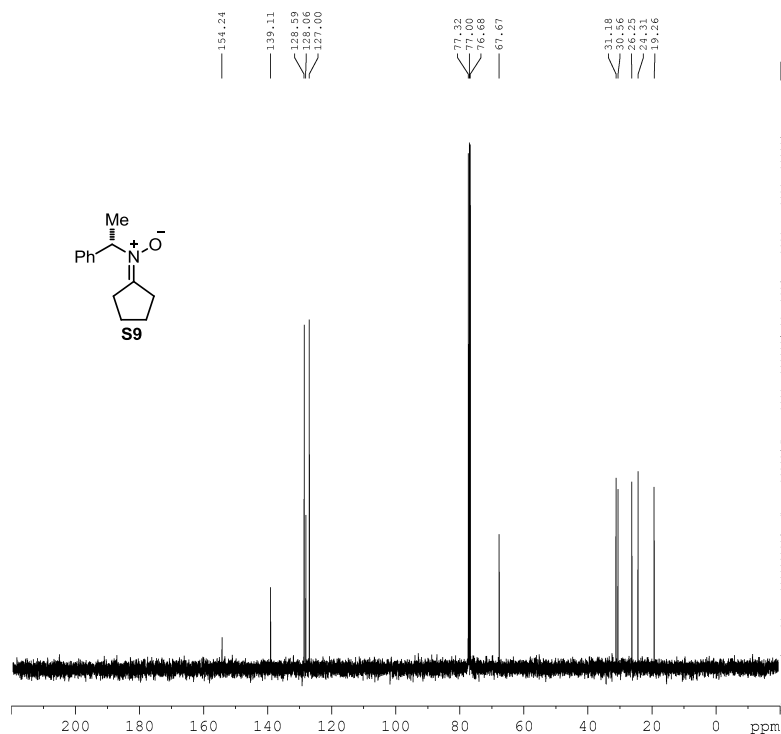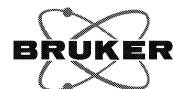

Current Data Parameters  
 NAME EJM-2-199-cl3  
 EXPNO 1  
 PROCNO 1

F2 - Acquisition Parameters  
 Date\_ 20120125  
 Time 12.56  
 INSTRUM spect  
 PROBHD 5 mm PABBO BB-  
 PULPROG zgpg30  
 TD 65536  
 SOLVENT CDCl3  
 NS 53  
 DS 0  
 SWH 24038.461 Hz  
 FIDRES 0.366798 Hz  
 AQ 1.363198 sec  
 RG 200.09  
 DW 20.800 usec  
 DE 6.50 usec  
 TE 301.7 K  
 D1 2.00000000 sec  
 D11 0.03000000 sec  
 TD0 1

===== CHANNEL f1 =====  
 NUC1 13C  
 P1 7.50 usec  
 PLW1 61.2000076 W  
 SF01 100.6127703 MHz

===== CHANNEL f2 =====  
 CDFPRG2 waltz16  
 NUC2 1H  
 PCPD2 80.00 usec  
 PLW2 11.19999981 W  
 PLW12 0.26820939 W  
 PLW13 0.1716001 W  
 SF02 400.0916004 MHz

F2 - Processing parameters  
 SI 32768  
 SF 100.6027164 MHz  
 WW EM  
 SSB 0  
 LB 1.00 Hz  
 GB 0  
 PC 1.40

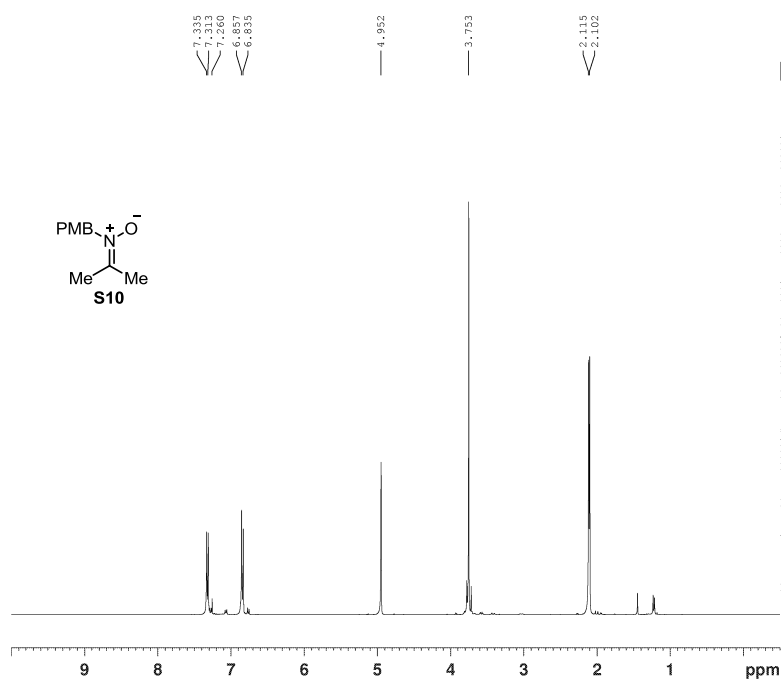

Current Data Parameters  
 NAME JTM-13-73-1  
 EXPNO 1  
 PROCNO 1

F2 - Acquisition Parameters  
 Date\_ 20120114  
 Time 10.25  
 INSTRUM spect  
 PROBHD 5 mm PABBO BB-  
 PULPROG zg30  
 TD 65536  
 SOLVENT CDCl3  
 NS 13  
 DS 0  
 SWH 8223.685 Hz  
 FIDRES 0.125483 Hz  
 AQ 3.9846387 sec  
 RG 44.2  
 DW 60.800 usec  
 DE 6.50 usec  
 TE 297.7 K  
 D1 1.0000000 sec  
 TD0 1

===== CHANNEL f1 =====  
 NUC1 1H  
 P1 12.38 usec  
 PLW1 11.19999981 W  
 SFO1 400.0924707 MHz

F2 - Processing parameters  
 SI 65536  
 SF 400.090115 MHz  
 WW EM  
 SSB 0  
 LB 0.30 Hz  
 GB 0  
 PC 1.00

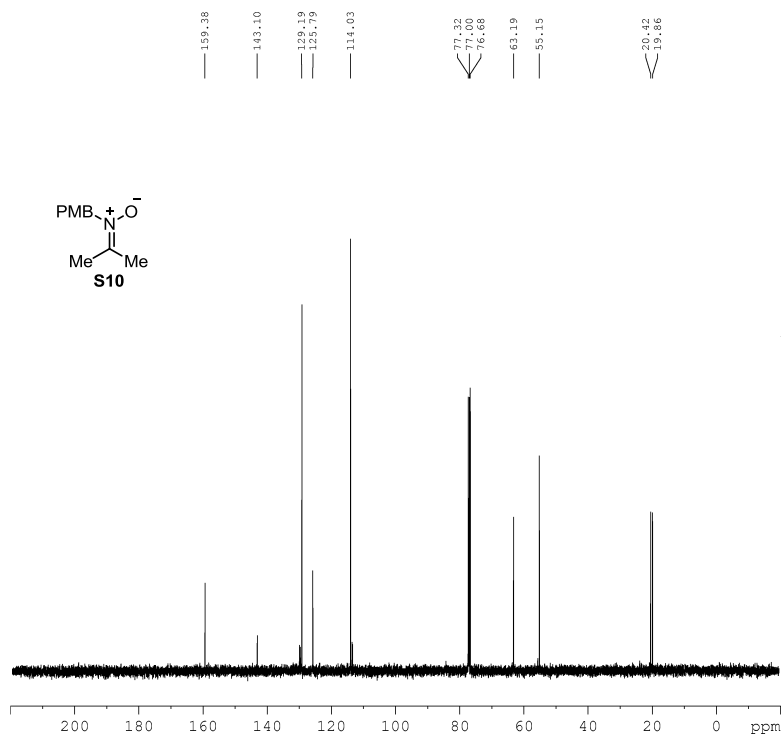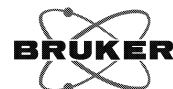

Current Data Parameters  
 NAME JTM-13-73-1 13C  
 EXPNO 1  
 PROCNO 1

F2 - Acquisition Parameters  
 Date\_ 20120114  
 Time 10.30  
 INSTRUM spect  
 PROBHD 5 mm PABBO BB-  
 PULPROG zgpg30  
 TD 65536  
 SOLVENT CDCl3  
 NS 63  
 DS 4  
 SWH 24038.461 Hz  
 FIDRES 0.366798 Hz  
 AQ 1.3631988 sec  
 RG 200.09  
 DW 20.800 usec  
 DE 6.50 usec  
 TE 298.4 K  
 D1 2.0000000 sec  
 D11 0.03000000 sec  
 TD0 1

===== CHANNEL f1 =====  
 NUC1 13C  
 P1 7.50 usec  
 PLW1 61.20000076 W  
 SFO1 100.6127703 MHz

===== CHANNEL f2 =====  
 CPDPRG2 waltz16  
 NUC2 1H  
 PCPD2 80.00 usec  
 PLM2 11.19999981 W  
 PLM12 0.26820999 W  
 PLM13 0.17166001 W  
 SFO2 400.0916004 MHz

F2 - Processing parameters  
 SI 32768  
 SF 100.6027244 MHz  
 WDW EM  
 SSB 0  
 LB 1.00 Hz  
 GB 0  
 PC 1.40

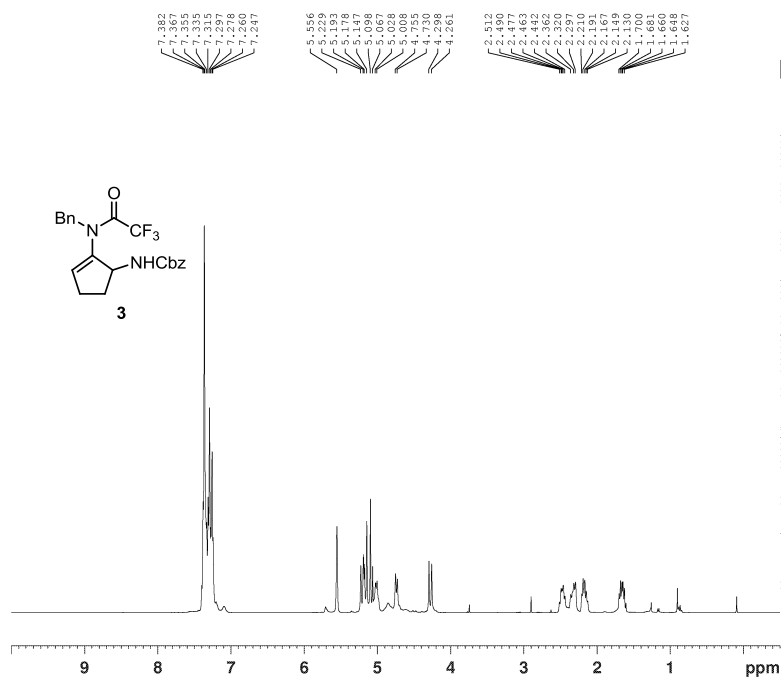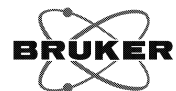

Current Data Parameters  
 NAME JTM-13-Bn Prod  
 EXPNO 1  
 PROCNO 1

F2 - Acquisition Parameters  
 Date\_ 20120120  
 Time 6.52  
 INSTRUM spect  
 PROBHD 5 mm PABBO BB-  
 PULPROG zg30  
 TD 65536  
 SOLVENT CDCl3  
 NS 19  
 DS 0  
 SWH 8223.685 Hz  
 FIDRES 0.125483 Hz  
 AQ 3.9846387 sec  
 RG 59.75  
 DW 60.800 usec  
 DE 6.50 usec  
 TE 297.6 K  
 D1 1.0000000 sec  
 TD0 1

===== CHANNEL f1 =====  
 NUC1 1H  
 P1 12.38 usec  
 PLW1 11.19999981 W  
 SFO1 400.0924707 MHz

F2 - Processing parameters  
 SI 65536  
 SF 400.0900115 MHz  
 WW EM  
 SSB 0  
 LB 0.30 Hz  
 GB 0  
 PC 1.00

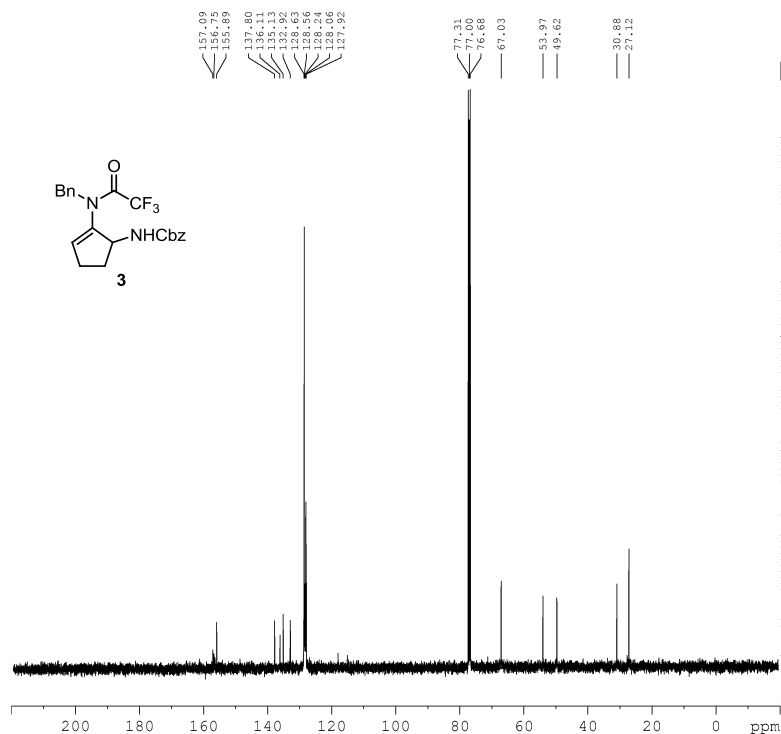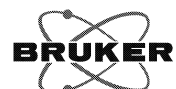

Current Data Parameters  
 NAME JTM-13-Bn Prod 13C  
 EXPNO 1  
 PROCNO 1

F2 - Acquisition Parameters  
 Date\_ 20120120  
 Time 6.56  
 INSTRUM spect  
 PROBHD 5 mm PABBO BB-  
 PULPROG zgpg30  
 TD 65536  
 SOLVENT CDCl3  
 NS 152  
 DS 0  
 SWH 24038.461 Hz  
 FIDRES 0.366798 Hz  
 AQ 1.363198 sec  
 RG 200.09  
 DW 20.800 usec  
 DE 6.50 usec  
 TE 297.5 K  
 D1 2.0000000 sec  
 D11 0.0300000 sec  
 TD0 1

===== CHANNEL f1 =====  
 NUC1 13C  
 P1 7.50 usec  
 PLW1 61.2000076 W  
 SFO1 100.6127703 MHz

===== CHANNEL f2 =====  
 CDEPRG2 waltz16  
 NUC2 1H  
 PCPD2 80.00 usec  
 PLW2 11.19999981 W  
 PLW12 0.26820939 W  
 PLW13 0.1716001 W  
 SFO2 400.0916004 MHz

F2 - Processing parameters  
 SI 32768  
 SF 100.6027186 MHz  
 WW EM  
 SSB 0  
 LB 1.00 Hz  
 GB 0  
 PC 1.40

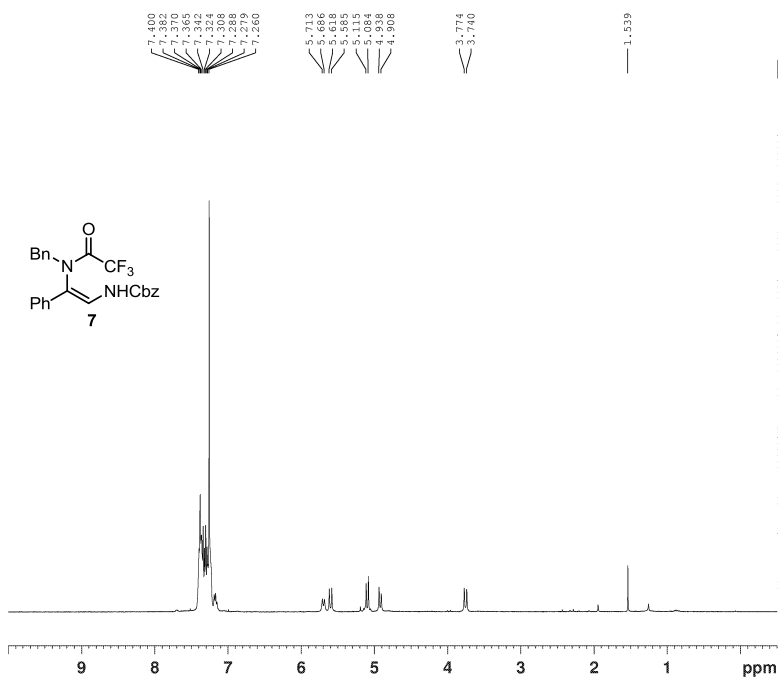

Current Data Parameters  
 NAME JTM-13-13-3  
 EXPNO 1  
 PROCNO 1

F2 - Acquisition Parameters  
 Date\_ 20120104  
 Time 7.03  
 INSTRUM spect  
 PROBHD 5 mm PABBO BB-  
 PULPROG zg30  
 TD 65536  
 SOLVENT CDCl3  
 NS 24  
 DS 0  
 SWH 8223.685 Hz  
 FIDRES 0.125483 Hz  
 AQ 3.9846387 sec  
 RG 200.09  
 DW 60.800 usec  
 DE 6.50 usec  
 TE 297.6 K  
 D1 1.0000000 sec  
 TDO 1

===== CHANNEL f1 =====  
 NUC1 1H  
 P1 12.38 usec  
 PLW1 11.19999981 W  
 SFO1 400.0924707 MHz

F2 - Processing parameters  
 SI 65536  
 SF 400.0900111 MHz  
 WDW EM  
 SSB 0  
 LB 0.30 Hz  
 GB 0  
 PC 1.00

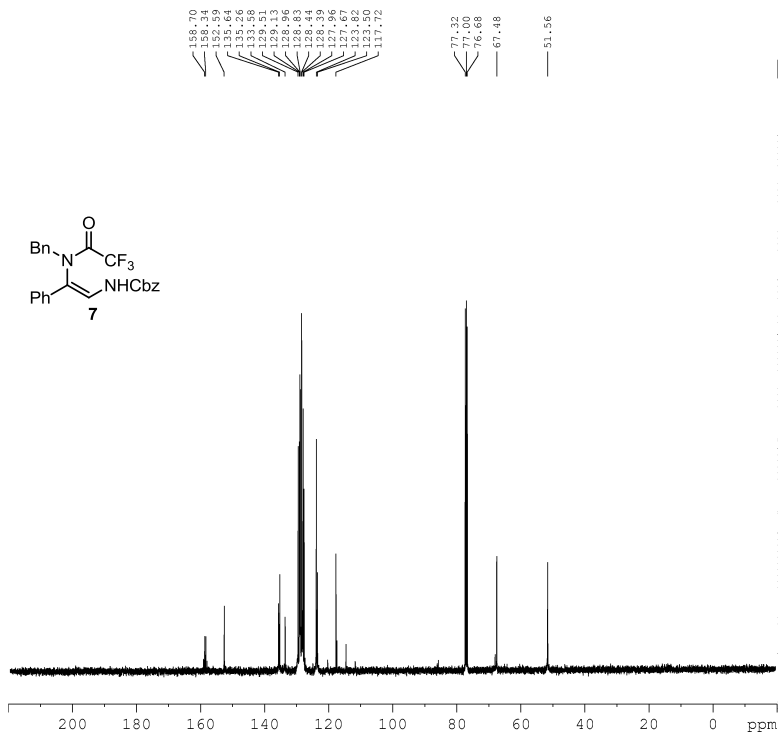

Current Data Parameters  
 NAME JTM-13-227-1 13C  
 EXPNO 1  
 PROCNO 1

F2 - Acquisition Parameters  
 Date\_ 20120218  
 Time 9.10  
 INSTRUM spect  
 PROBHD 5 mm PABBO BB-  
 PULPROG zgpg30  
 TD 65536  
 SOLVENT CDCl3  
 NS 132  
 DS 0  
 SWH 24038.461 Hz  
 FIDRES 0.366798 Hz  
 AQ 1.3631988 sec  
 RG 200.09  
 DW 20.800 usec  
 DE 6.50 usec  
 TE 297.8 K  
 D1 2.0000000 sec  
 D11 0.03000000 sec  
 TDO 1

===== CHANNEL f1 =====  
 NUC1 13C  
 P1 7.50 usec  
 PLW1 61.20000076 W  
 SFO1 100.6127703 MHz

===== CHANNEL f2 =====  
 CDFPRG2 waltz16  
 NUC2 1H  
 PCPD2 80.00 usec  
 PLW2 11.19999981 W  
 PLW12 0.26820939 W  
 PLW13 0.17166001 W  
 SFO2 400.0916004 MHz

F2 - Processing parameters  
 SI 32768  
 SF 100.6027259 MHz  
 WDW EM  
 SSB 0  
 LB 1.00 Hz  
 GB 0  
 PC 1.40

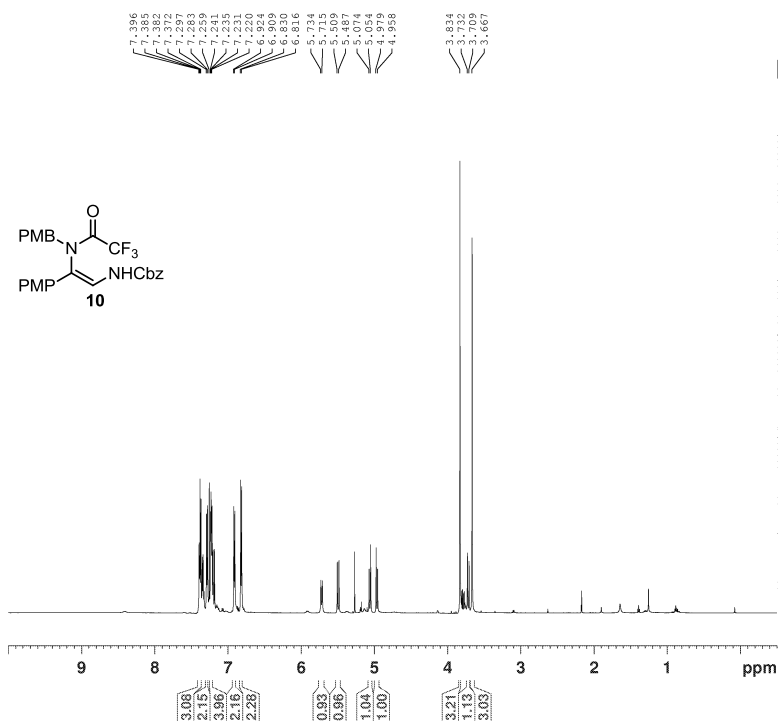

Current Data Parameters  
 NAME JTM-13-57-2  
 EXPNO 1  
 PROCNO 1

F2 - Acquisition Parameters  
 Date\_ 20120111  
 Time 12.58  
 INSTRUM spect  
 PROBHD 5 mm PABBO BB-  
 PULPROG zg30  
 TD 65536  
 SOLVENT CDCl3  
 NS 16  
 DS 0  
 SWH 12335.526 Hz  
 FIDRES 0.188225 Hz  
 AQ 2.6564426 sec  
 RG 203  
 DW 40.533 usec  
 DE 6.50 usec  
 TE 292.7 K  
 D1 1.0000000 sec  
 TDO 1

===== CHANNEL f1 =====  
 NUC1 1H  
 P1 13.80 usec  
 PLW1 20.0000000 W  
 SF01 600.1337060 MHz

F2 - Processing parameters  
 SI 65536  
 SF 600.1300184 MHz  
 WW EM  
 SSB 0  
 LB 0.30 Hz  
 GB 0  
 PC 1.00

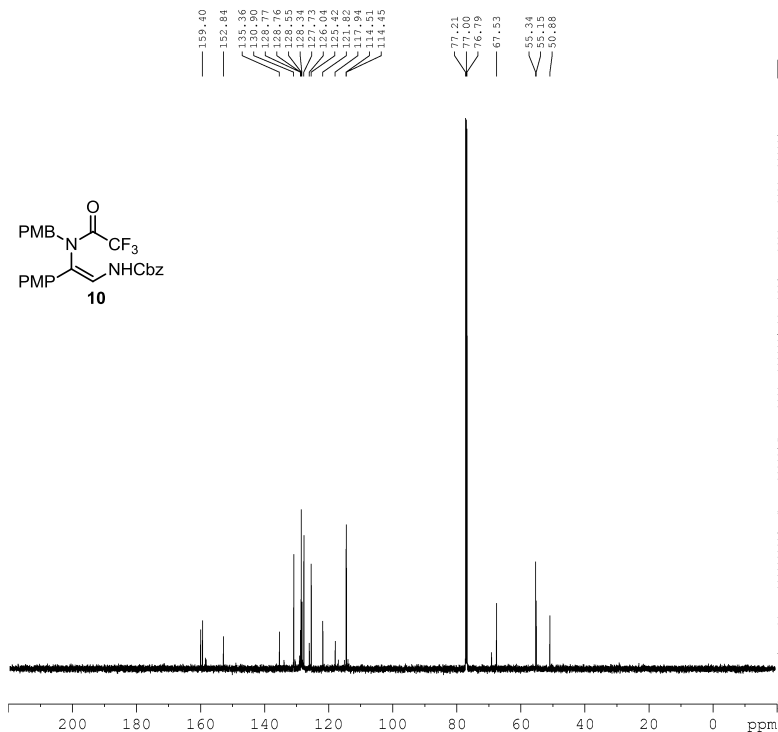

Current Data Parameters  
 NAME JTM-13-57-2 13C  
 EXPNO 1  
 PROCNO 1

F2 - Acquisition Parameters  
 Date\_ 20120111  
 Time 13.06  
 INSTRUM spect  
 PROBHD 5 mm PABBO BB-  
 PULPROG zgpg30  
 TD 65536  
 SOLVENT CDCl3  
 NS 239  
 DS 0  
 SWH 36057.691 Hz  
 FIDRES 0.550197 Hz  
 AQ 0.3088159 sec  
 RG 203  
 DW 13.867 usec  
 DE 10.00 usec  
 TE 293.9 K  
 D1 2.0000000 sec  
 D11 0.0300000 sec  
 TDO 1

===== CHANNEL f1 =====  
 NUC1 13C  
 P1 10.50 usec  
 PLW1 110.0000000 W  
 SF01 150.9178981 MHz

===== CHANNEL f2 =====  
 CDFPRG2 waltz16  
 NUC2 1H  
 PCPD2 70.00 usec  
 PLW2 20.0000000 W  
 PLW12 0.8000001 W  
 PLW13 0.3919999 W  
 SF02 600.1324005 MHz

F2 - Processing parameters  
 SI 32768  
 SF 150.9028184 MHz  
 WW EM  
 SSB 0  
 LB 1.00 Hz  
 GB 0  
 PC 1.40

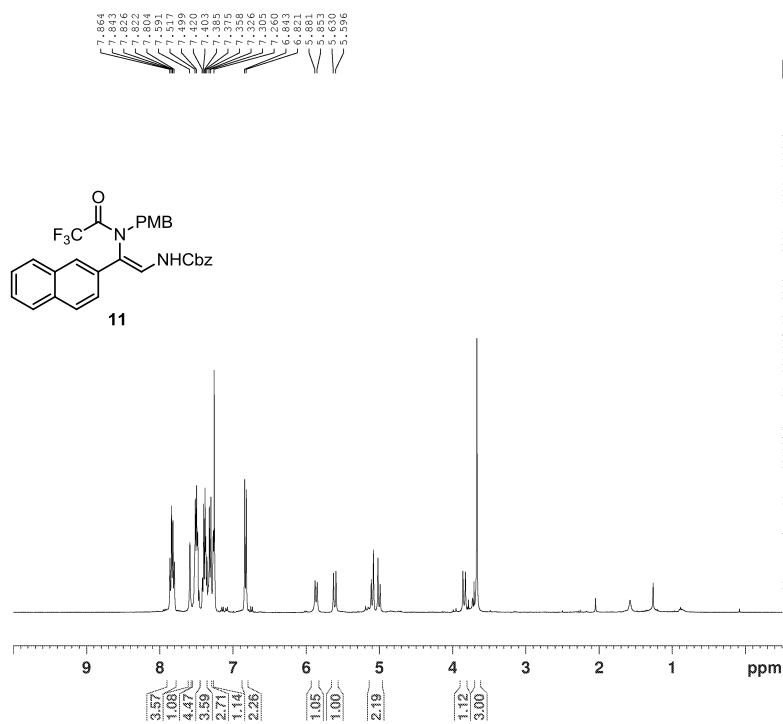

Current Data Parameters  
 NAME EJM-2-179-2h  
 EXPNO 1  
 PROCNO 1

F2 - Acquisition Parameters  
 Date\_ 20120112  
 Time 10.57  
 INSTRUM spect  
 PROBHD 5 mm PABBO BB-  
 PULPROG zg30  
 TD 65536  
 SOLVENT CDCl3  
 NS 12  
 DS 0  
 SWH 8223.685 Hz  
 FIDRES 0.125483 Hz  
 AQ 3.9846387 sec  
 RG 120.26  
 DW 60.800 usec  
 DE 6.50 usec  
 TE 297.2 K  
 D1 1.00000000 sec  
 TDO 1

==== CHANNEL f1 =====  
 NUC1 1H  
 P1 12.38 usec  
 PLW1 11.19999981 W  
 SF01 400.0924707 MHz

F2 - Processing parameters  
 SI 65536  
 SF 400.0900116 MHz  
 WW EM  
 SSB 0  
 LB 0.30 Hz  
 GB 0  
 PC 1.00

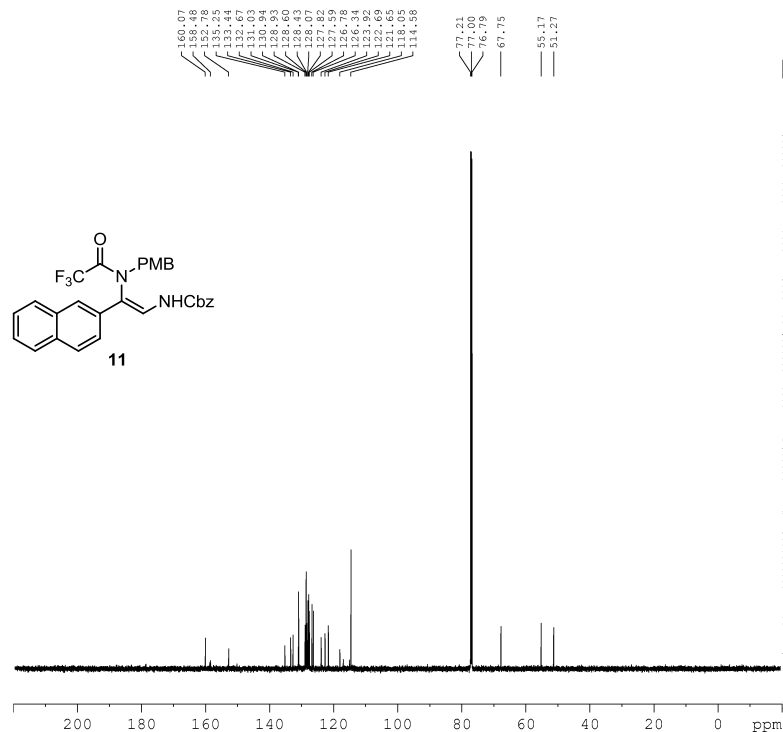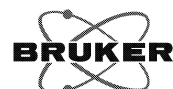

Current Data Parameters  
 NAME JTM-E-185-13C  
 EXPNO 1  
 PROCNO 1

F2 - Acquisition Parameters  
 Date\_ 20120118  
 Time 11.33  
 INSTRUM spect  
 PROBHD 5 mm PABBO BB-  
 PULPROG zgpg30  
 TD 65536  
 SOLVENT CDCl3  
 NS 328  
 DS 0  
 SWH 36057.691 Hz  
 FIDRES 0.550197 Hz  
 AQ 0.3088159 sec  
 RG 203  
 DW 13.867 usec  
 DE 10.00 usec  
 TE 293.3 K  
 D1 2.00000000 sec  
 D11 0.03000000 sec  
 TDO 1

==== CHANNEL f1 =====  
 NUC1 13C  
 P1 10.50 usec  
 PLW1 110.00000000 W  
 SF01 150.9178981 MHz

==== CHANNEL f2 =====  
 CDEPRG2 waltz16  
 NUC2 1H  
 PCPD2 70.00 usec  
 PLW2 20.00000000 W  
 PLW12 0.80000001 W  
 PLW13 0.39199999 W  
 SF02 600.1324005 MHz

F2 - Processing parameters  
 SI 32768  
 SF 150.9028173 MHz  
 WW EM  
 SSB 0  
 LB 1.00 Hz  
 GB 0  
 PC 1.40

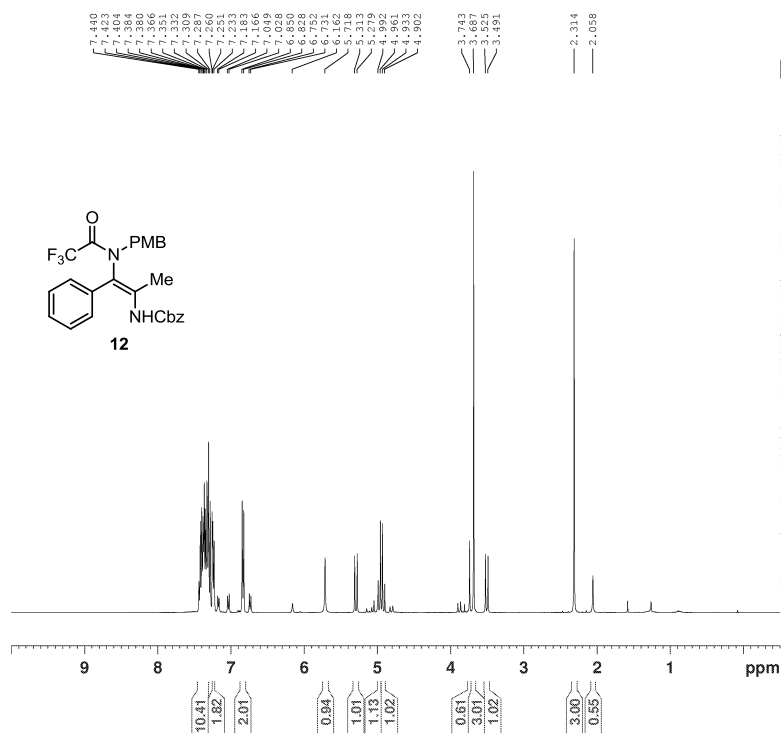

Current Data Parameters  
 NAME EJM-2-178-h  
 EXPNO 1  
 PROCNO 1

F2 - Acquisition Parameters  
 Date\_ 20120114  
 Time 14.15  
 INSTRUM spect  
 PROBHD 5 mm PABBO BB-  
 PULPROG zg30  
 TD 65536  
 SOLVENT CDCl3  
 NS 12  
 DS 0  
 SWH 8223.685 Hz  
 FIDRES 0.125483 Hz  
 AQ 3.9846387 sec  
 RG 88.16  
 DW 60.800 usec  
 DE 6.50 usec  
 TE 297.7 K  
 D1 1.0000000 sec  
 TD0 1

===== CHANNEL f1 =====  
 NUC1 1H  
 P1 12.38 usec  
 PLW1 11.19999981 W  
 SF01 400.0924707 MHz

F2 - Processing parameters  
 SI 65536  
 SF 400.0900116 MHz  
 WDW EM  
 SSB 0  
 LB 0.30 Hz  
 GB 0  
 PC 1.00

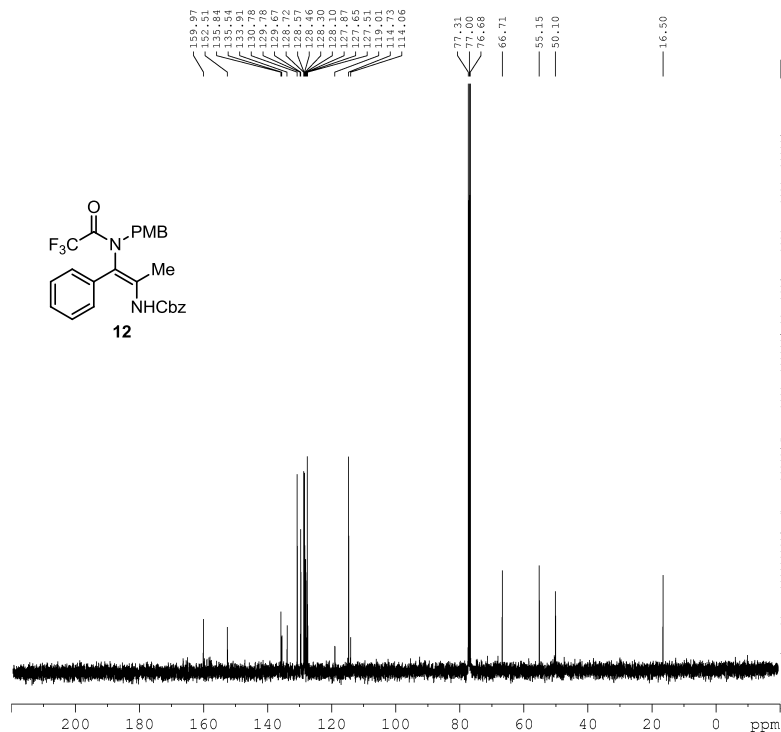

Current Data Parameters  
 NAME EJM-2-178-cl3  
 EXPNO 1  
 PROCNO 1

F2 - Acquisition Parameters  
 Date\_ 20120114  
 Time 14.21  
 INSTRUM spect  
 PROBHD 5 mm PABBO BB-  
 PULPROG zgpg30  
 TD 65536  
 SOLVENT CDCl3  
 NS 118  
 DS 0  
 SWH 24038.461 Hz  
 FIDRES 0.366798 Hz  
 AQ 1.3631988 sec  
 RG 200.09  
 DW 20.800 usec  
 DE 6.50 usec  
 TE 297.5 K  
 D1 2.0000000 sec  
 D11 0.0300000 sec  
 TD0 1

===== CHANNEL f1 =====  
 NUC1 13C  
 P1 7.50 usec  
 PLW1 61.2000076 W  
 SF01 100.6127703 MHz

===== CHANNEL f2 =====  
 CDFPRG2 waltz16  
 NUC2 1H  
 PCPD2 80.00 usec  
 PLW2 11.19999981 W  
 PLW12 0.26820999 W  
 PLW13 0.17166001 W  
 SF02 400.0916004 MHz

F2 - Processing parameters  
 SI 32768  
 SF 100.6027149 MHz  
 WDW EM  
 SSB 0  
 LB 1.00 Hz  
 GB 0  
 PC 1.40



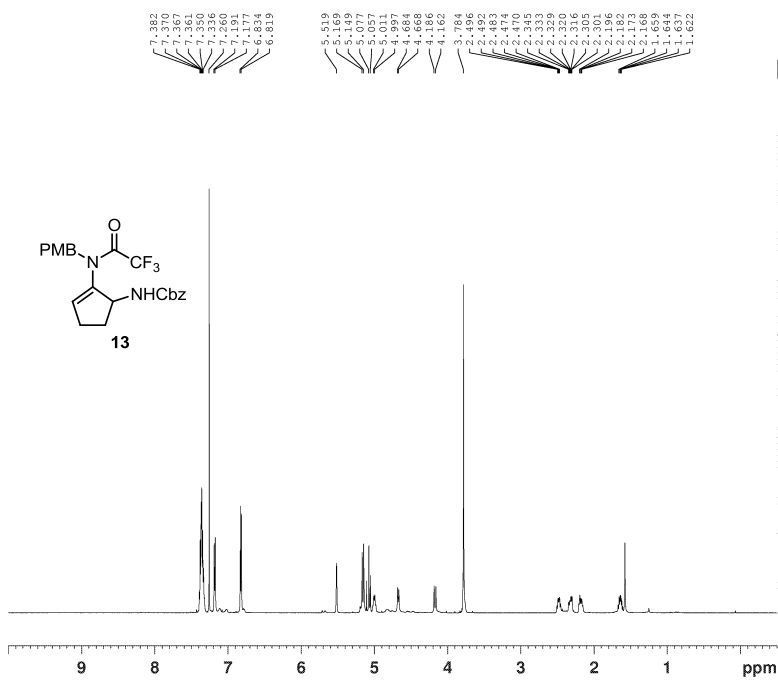

Current Data Parameters  
 NAME JTM-12-257-3 1H  
 EXPNO 1  
 PROCNO 1

F2 - Acquisition Parameters  
 Date\_ 20111216  
 Time 12.03  
 INSTRUM spect  
 PROBHD 5 mm PABBO BB-  
 PULPROG zg30  
 TD 65536  
 SOLVENT CDCl3  
 NS 21  
 DS 0  
 SWH 12335.526 Hz  
 FIDRES 0.188225 Hz  
 AQ 2.6564426 sec  
 RG 203  
 DW 40.533 usec  
 DE 6.50 usec  
 TE 292.8 K  
 D1 1.0000000 sec  
 TDO 1

===== CHANNEL f1 =====  
 NUC1 1H  
 P1 13.80 usec  
 PLW1 20.0000000 W  
 SF01 600.1337060 MHz

F2 - Processing parameters  
 SI 65536  
 SF 600.1300180 MHz  
 WDW EM  
 SSB 0  
 LB 0.30 Hz  
 GB 0  
 PC 1.00

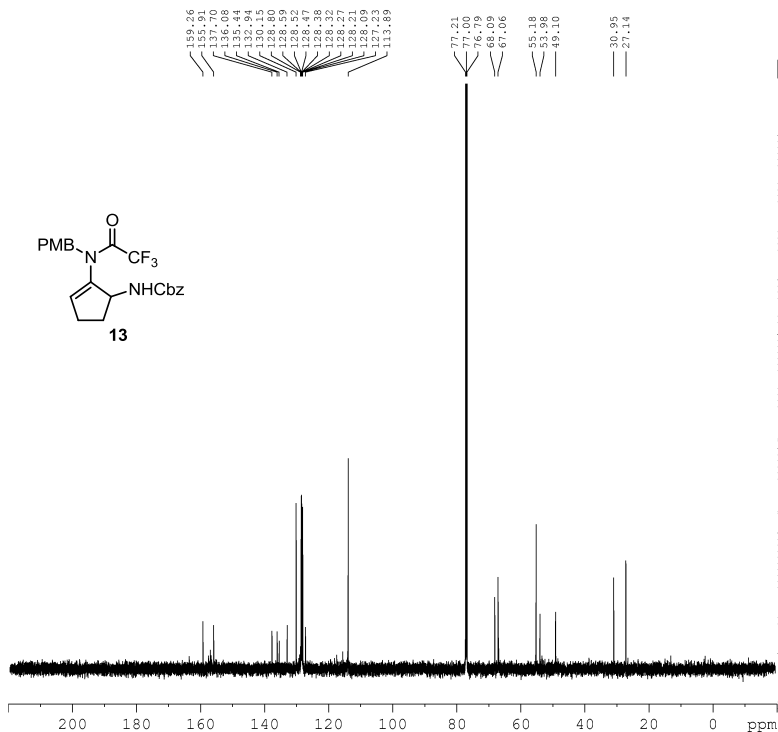

Current Data Parameters  
 NAME JTM-12-257-3 13C  
 EXPNO 1  
 PROCNO 1

F2 - Acquisition Parameters  
 Date\_ 20111216  
 Time 12.10  
 INSTRUM spect  
 PROBHD 5 mm PABBO BB-  
 PULPROG zgpg30  
 TD 65536  
 SOLVENT CDCl3  
 NS 181  
 DS 0  
 SWH 36057.691 Hz  
 FIDRES 0.550197 Hz  
 AQ 0.3088159 sec  
 RG 203  
 DW 13.867 usec  
 DE 10.00 usec  
 TE 293.4 K  
 D1 2.0000000 sec  
 D11 0.0300000 sec  
 TDO 1

===== CHANNEL f1 =====  
 NUC1 13C  
 P1 10.50 usec  
 PLW1 110.0000000 W  
 SF01 150.9178981 MHz

===== CHANNEL f2 =====  
 CDFPRG2 waltz16  
 NUC2 1H  
 PCPD2 70.00 usec  
 PLW2 20.0000000 W  
 PLW12 0.8000000 W  
 PLW13 0.3919999 W  
 SF02 600.1324005 MHz

F2 - Processing parameters  
 SI 32768  
 SF 150.9028184 MHz  
 WDW EM  
 SSB 0  
 LB 1.00 Hz  
 GB 0  
 PC 1.40

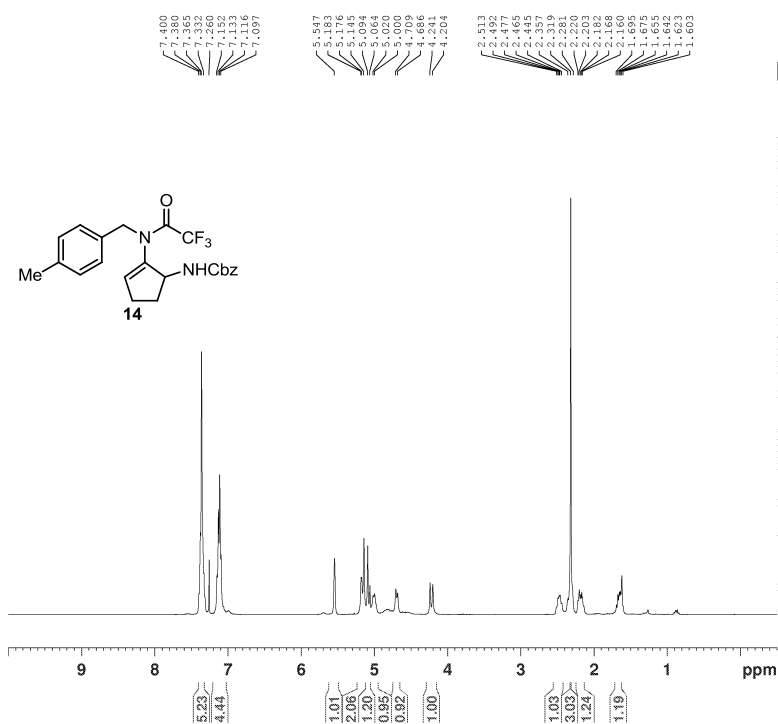

Current Data Parameters  
 NAME JTM-13-113-b  
 EXPNO 1  
 PROCNO 1

F2 - Acquisition Parameters  
 Date\_ 20120121  
 Time 9.21  
 INSTRUM spect  
 PROBHD 5 mm PABBO BB-  
 PULPROG zg30  
 TD 65536  
 SOLVENT CDCl3  
 NS 21  
 DS 0  
 SWH 8223.685 Hz  
 FIDRES 0.125483 Hz  
 AQ 3.9846387 sec  
 RG 71.37  
 DW 60.800 usec  
 DE 6.50 usec  
 TE 301.6 K  
 D1 1.0000000 sec  
 TD0 1

===== CHANNEL f1 =====  
 NUC1 1H  
 P1 12.38 usec  
 PLW1 11.19999981 W  
 SF01 400.0924707 MHz

F2 - Processing parameters  
 SI 65536  
 SF 400.0900113 MHz  
 WDW EM  
 SSB 0  
 LB 0.30 Hz  
 GB 0  
 PC 1.00

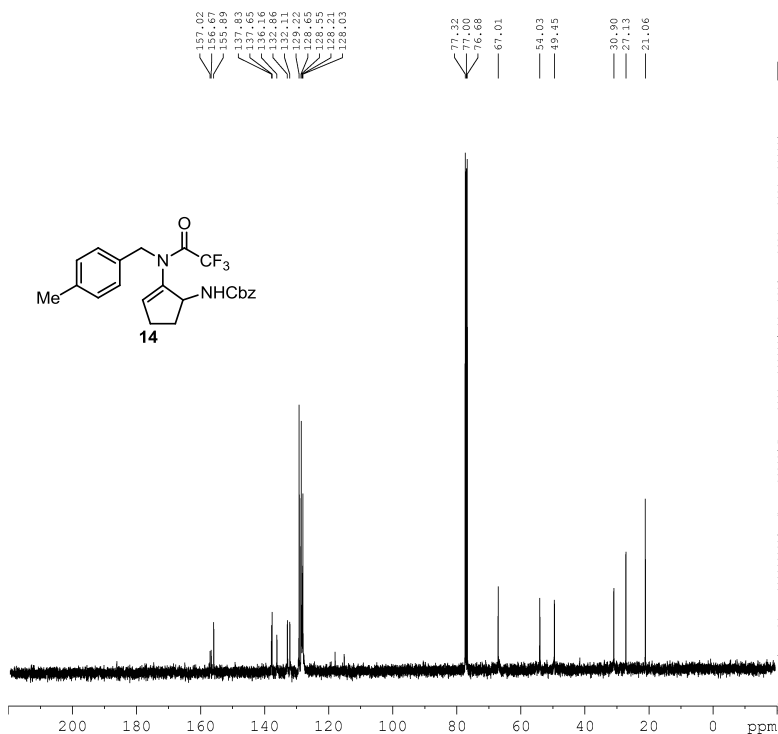

Current Data Parameters  
 NAME JTM-13-113 13C  
 EXPNO 1  
 PROCNO 1

F2 - Acquisition Parameters  
 Date\_ 20120121  
 Time 11.03  
 INSTRUM spect  
 PROBHD 5 mm PABBO BB-  
 PULPROG zgpg30  
 TD 65536  
 SOLVENT CDCl3  
 NS 174  
 DS 0  
 SWH 24038.461 Hz  
 FIDRES 0.366798 Hz  
 AQ 1.363198 sec  
 RG 200.09  
 DW 20.800 usec  
 DE 6.50 usec  
 TE 301.5 K  
 D1 2.0000000 sec  
 D11 0.0300000 sec  
 TD0 1

===== CHANNEL f1 =====  
 NUC1 13C  
 P1 7.50 usec  
 PLW1 61.2000076 W  
 SF01 100.6127703 MHz

===== CHANNEL f2 =====  
 CDFPRG2 waltz16  
 NUC2 1H  
 PCPD2 80.00 usec  
 PLW2 11.19999981 W  
 PLW12 0.26820939 W  
 PLW13 0.17166001 W  
 SF02 400.0916004 MHz

F2 - Processing parameters  
 SI 32768  
 SF 100.6027184 MHz  
 WDW EM  
 SSB 0  
 LB 1.00 Hz  
 GB 0  
 PC 1.40

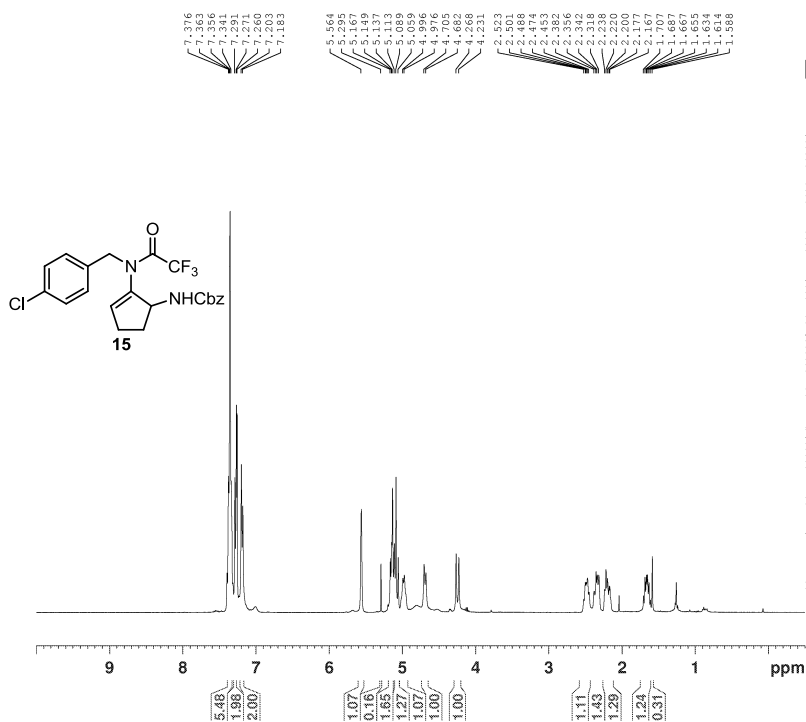

Current Data Parameters  
 NAME EJM-2-197-2b  
 EXPNO 1  
 PROCNO 1

F2 - Acquisition Parameters  
 Date\_ 20120123  
 Time 13.13  
 INSTRUM spect  
 PROBHD 5 mm PABBO BB-  
 PULPROG zg30  
 TD 65536  
 SOLVENT CDCl3  
 NS 16  
 DS 0  
 SWH 8223.685 Hz  
 FIDRES 0.125483 Hz  
 AQ 3.9846387 sec  
 RG 110.42  
 DW 60.900 usec  
 DE 6.50 usec  
 TE 301.1 K  
 D1 1.00000000 sec  
 TDO 1

===== CHANNEL f1 =====  
 NUC1 1H  
 P1 12.38 usec  
 PLW1 11.19999981 W  
 SF01 400.0924707 MHz

F2 - Processing parameters  
 SI 65536  
 SF 400.0900118 MHz  
 WDW EM  
 SSB 0  
 LB 0.30 Hz  
 GB 0  
 PC 1.00

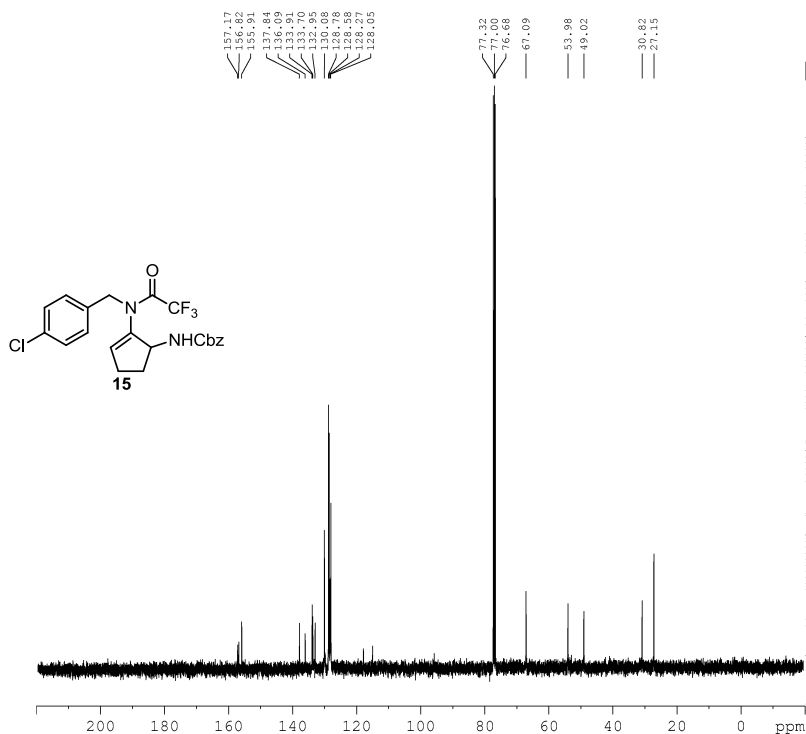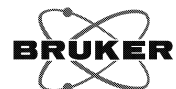

Current Data Parameters  
 NAME EJM-2-197-cl3  
 EXPNO 1  
 PROCNO 1

F2 - Acquisition Parameters  
 Date\_ 20120124  
 Time 16.03  
 INSTRUM spect  
 PROBHD 5 mm PABBO BB-  
 PULPROG zgpg30  
 TD 65536  
 SOLVENT CDCl3  
 NS 115  
 DS 0  
 SWH 24038.461 Hz  
 FIDRES 0.366798 Hz  
 AQ 1.363198 sec  
 RG 200.09  
 DW 20.800 usec  
 DE 6.50 usec  
 TE 301.6 K  
 D1 2.00000000 sec  
 D11 0.03000000 sec  
 TDO 1

===== CHANNEL f1 =====  
 NUC1 13C  
 P1 7.50 usec  
 PLW1 61.2000076 W  
 SF01 100.6127703 MHz

===== CHANNEL f2 =====  
 CDFPRG2 waltz16  
 NUC2 1H  
 PCPD2 80.00 usec  
 PLW2 11.19999981 W  
 PLW12 0.26820999 W  
 PLW13 0.17166001 W  
 SF02 400.0916004 MHz

F2 - Processing parameters  
 SI 32768  
 SF 100.6027164 MHz  
 WDW EM  
 SSB 0  
 LB 1.00 Hz  
 GB 0  
 PC 1.40

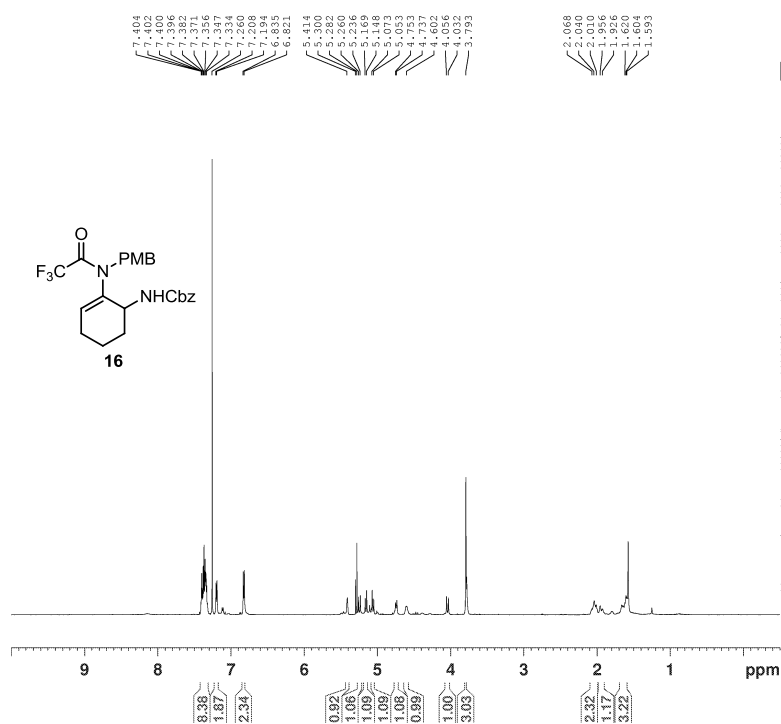

Current Data Parameters  
 NAME JTM-12-297-1 1H  
 EXPNO 1  
 PROCNO 1

F2 - Acquisition Parameters  
 Date\_ 20111221  
 Time 13.11  
 INSTRUM spect  
 PROBHD 5 mm PABBO BB-  
 PULPROG zg30  
 TD 65536  
 SOLVENT CDCl3  
 NS 16  
 DS 0  
 SWH 12335.526 Hz  
 FIDRES 0.188225 Hz  
 AQ 2.6564426 sec  
 RG 203  
 DW 40.533 usec  
 DE 6.50 usec  
 TE 292.6 K  
 D1 1.0000000 sec  
 TD0 1

===== CHANNEL f1 =====  
 NUC1 1H  
 P1 13.80 usec  
 PLW1 20.0000000 W  
 SF01 600.1337060 MHz

F2 - Processing parameters  
 SI 65536  
 SF 600.1300180 MHz  
 WDW EM  
 SSB 0  
 LB 0.30 Hz  
 GB 0  
 PC 1.00

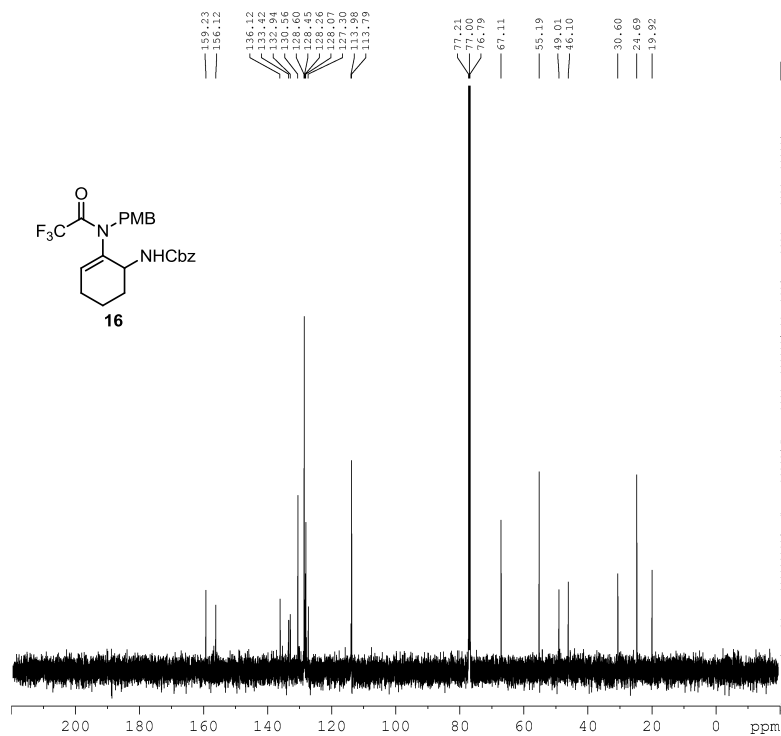

Current Data Parameters  
 NAME JTM-12-265-2 13C  
 EXPNO 1  
 PROCNO 1

F2 - Acquisition Parameters  
 Date\_ 20111216  
 Time 9.56  
 INSTRUM spect  
 PROBHD 5 mm PABBO BB-  
 PULPROG zgpg30  
 TD 65536  
 SOLVENT CDCl3  
 NS 147  
 DS 0  
 SWH 36057.691 Hz  
 FIDRES 0.550197 Hz  
 AQ 0.308159 sec  
 RG 203  
 DW 13.867 usec  
 DE 10.00 usec  
 TE 292.8 K  
 D1 2.0000000 sec  
 D11 0.0300000 sec  
 TD0 1

===== CHANNEL f1 =====  
 NUC1 13C  
 P1 10.50 usec  
 PLW1 110.0000000 W  
 SF01 150.9178981 MHz

===== CHANNEL f2 =====  
 CDFPRG2 waltz16  
 NUC2 1H  
 PCPD2 70.00 usec  
 PLW2 20.0000000 W  
 PLW12 0.8000001 W  
 PLW13 0.3919999 W  
 SF02 600.1324005 MHz

F2 - Processing parameters  
 SI 32768  
 SF 150.9028162 MHz  
 WDW EM  
 SSB 0  
 LB 1.00 Hz  
 GB 0  
 PC 1.40

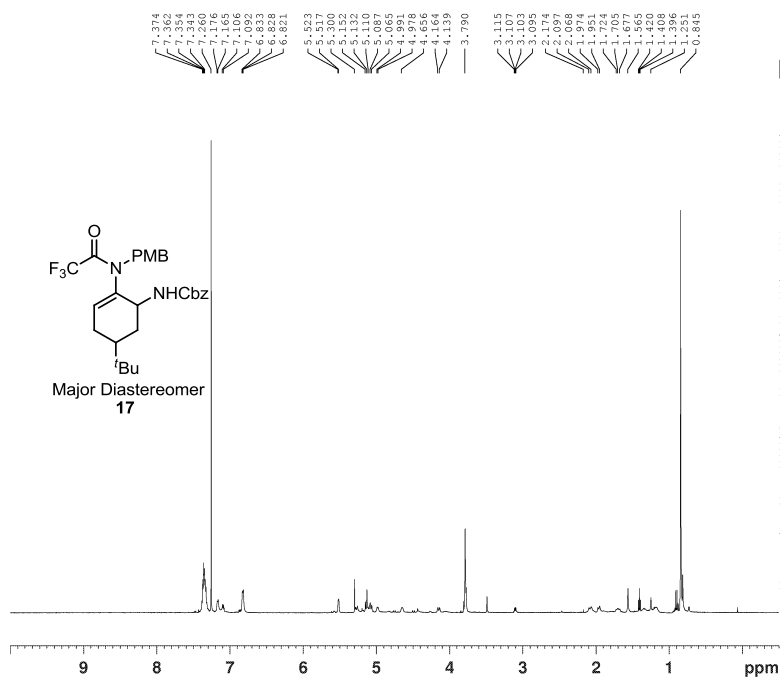

Current Data Parameters  
 NAME EJM-2-200-3  
 EXPNO 1  
 PROCNO 1

F2 - Acquisition Parameters  
 Date\_ 20120131  
 Time 14.32  
 INSTRUM spect  
 PROBHD 5 mm PABBO BB-  
 PULPROG zg30  
 TD 65536  
 SOLVENT CDCl3  
 NS 14  
 DS 0  
 SWH 12335.526 Hz  
 FIDRES 0.188225 Hz  
 AQ 2.6564426 sec  
 RG 203  
 DW 40.533 usec  
 DE 6.50 usec  
 TE 292.8 K  
 D1 1.0000000 sec  
 TDO 1

===== CHANNEL f1 =====  
 NUC1 1H  
 P1 13.60 usec  
 PLW1 20.0000000 W  
 SFO1 600.1337060 MHz

F2 - Processing parameters  
 SI 65536  
 SF 600.1300180 MHz  
 WDW EM  
 SSB 0  
 LB 0.30 Hz  
 GB 0  
 PC 1.00

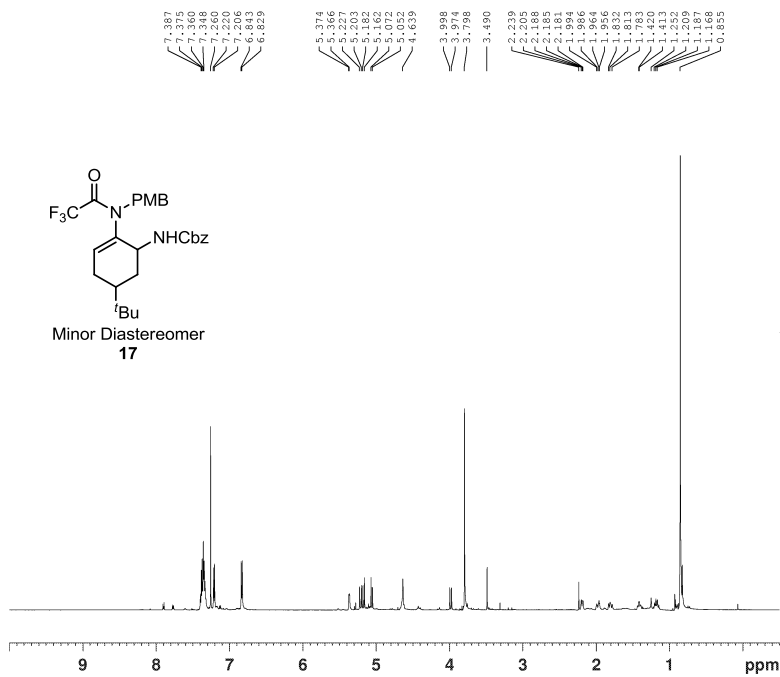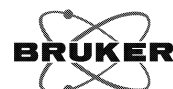

Current Data Parameters  
 NAME EJM-2-200-2  
 EXPNO 1  
 PROCNO 1

F2 - Acquisition Parameters  
 Date\_ 20120131  
 Time 14.22  
 INSTRUM spect  
 PROBHD 5 mm PABBO BB-  
 PULPROG zg30  
 TD 65536  
 SOLVENT CDCl3  
 NS 10  
 DS 0  
 SWH 12335.526 Hz  
 FIDRES 0.188225 Hz  
 AQ 2.6564426 sec  
 RG 203  
 DW 40.533 usec  
 DE 6.50 usec  
 TE 292.9 K  
 D1 1.0000000 sec  
 TDO 1

===== CHANNEL f1 =====  
 NUC1 1H  
 P1 13.60 usec  
 PLW1 20.0000000 W  
 SFO1 600.1337060 MHz

F2 - Processing parameters  
 SI 65536  
 SF 600.1300179 MHz  
 WDW EM  
 SSB 0  
 LB 0.30 Hz  
 GB 0  
 PC 1.00

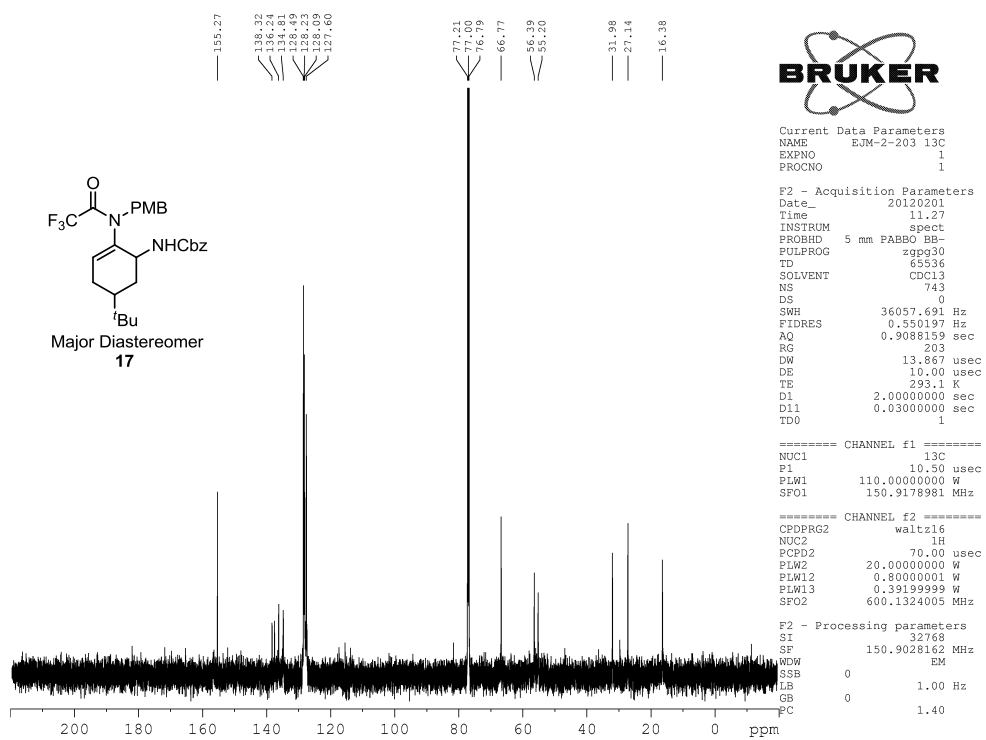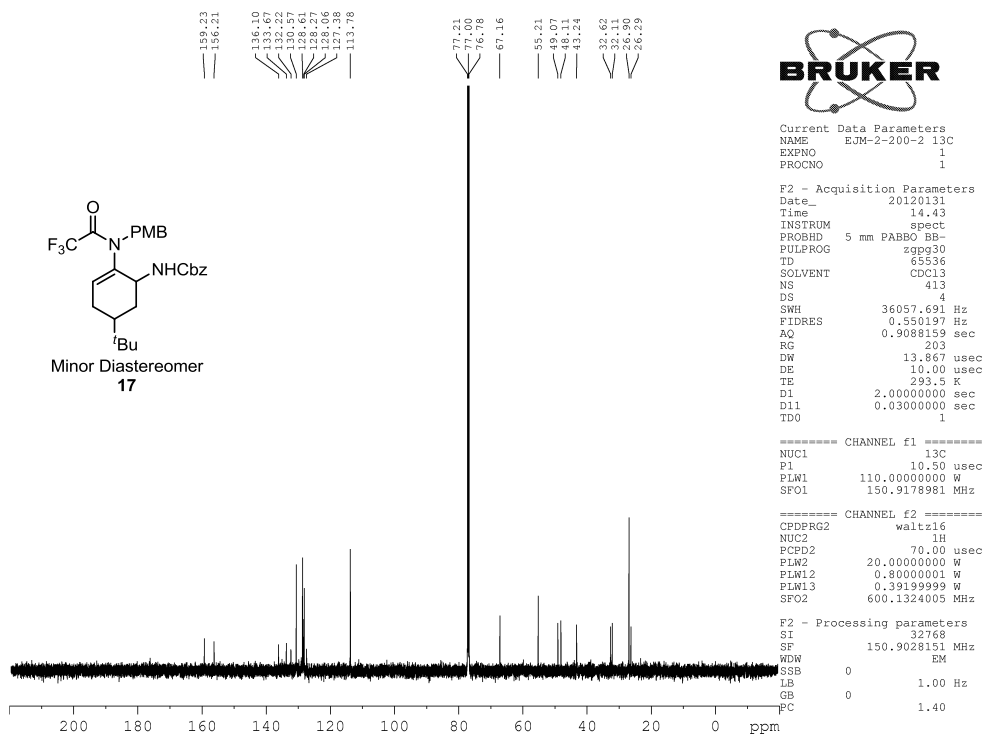

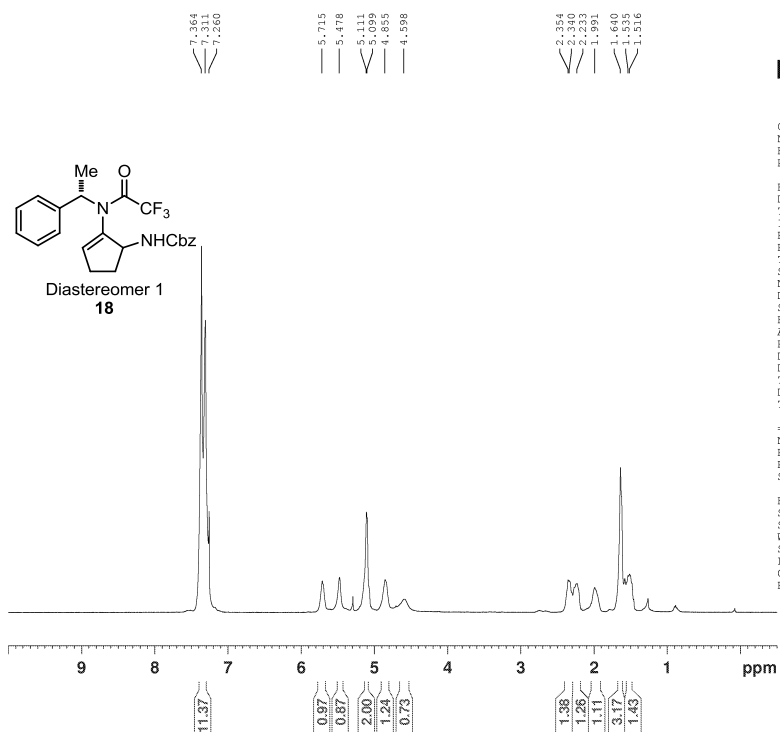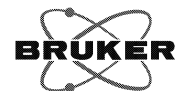

Current Data Parameters  
 NAME EJM-2-227-2  
 EXPNO 1  
 PROCNO 1

F2 - Acquisition Parameters  
 Date\_ 20120215  
 Time 15.43  
 INSTRUM spect  
 PROBHD 5 mm PABBO BB-  
 PULPROG zg30  
 TD 65536  
 SOLVENT CDCl3  
 NS 13  
 DS 0  
 SWH 8223.685 Hz  
 FIDRES 0.125483 Hz  
 AQ 3.9846387 sec  
 RG 120.26  
 DW 60.800 usec  
 DE 6.50 usec  
 TE 301.9 K  
 D1 1.0000000 sec  
 TDO 1

===== CHANNEL f1 =====  
 NUC1 1H  
 P1 12.38 usec  
 PLW1 11.19999981 W  
 SFO1 400.0924707 MHz

F2 - Processing parameters  
 SI 65536  
 SF 400.0900106 MHz  
 WW EM  
 SSB 0  
 LB 0.30 Hz  
 GB 0  
 PC 1.00

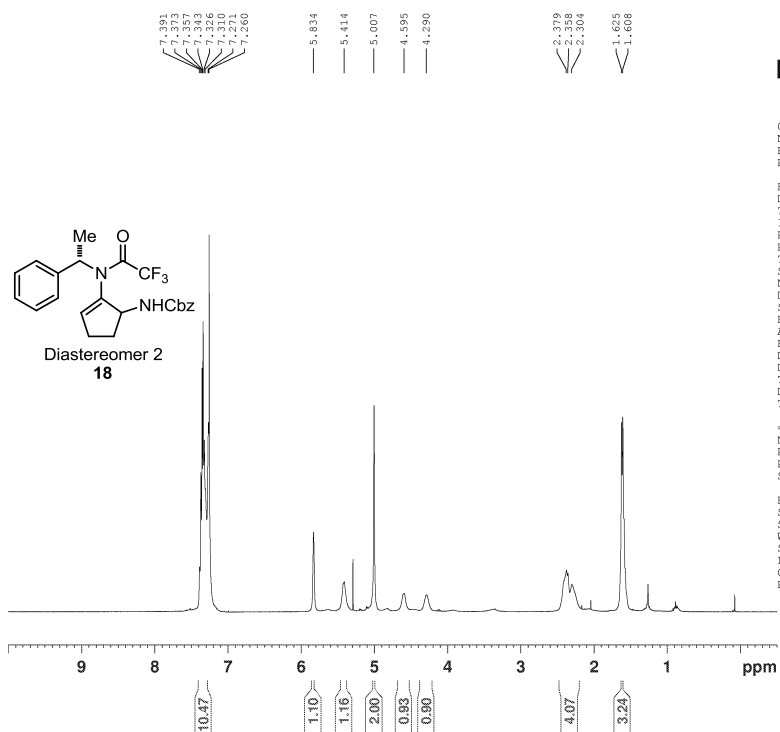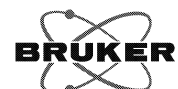

Current Data Parameters  
 NAME EJM-2-227-3  
 EXPNO 2  
 PROCNO 1

F2 - Acquisition Parameters  
 Date\_ 20120215  
 Time 15.52  
 INSTRUM spect  
 PROBHD 5 mm PABBO BB-  
 PULPROG zg30  
 TD 65536  
 SOLVENT CDCl3  
 NS 12  
 DS 0  
 SWH 8223.685 Hz  
 FIDRES 0.125483 Hz  
 AQ 3.9846387 sec  
 RG 110.42  
 DW 60.800 usec  
 DE 6.50 usec  
 TE 302.0 K  
 D1 1.0000000 sec  
 TDO 1

===== CHANNEL f1 =====  
 NUC1 1H  
 P1 12.38 usec  
 PLW1 11.19999981 W  
 SFO1 400.0924707 MHz

F2 - Processing parameters  
 SI 65536  
 SF 400.0900113 MHz  
 WW EM  
 SSB 0  
 LB 0.30 Hz  
 GB 0  
 PC 1.00

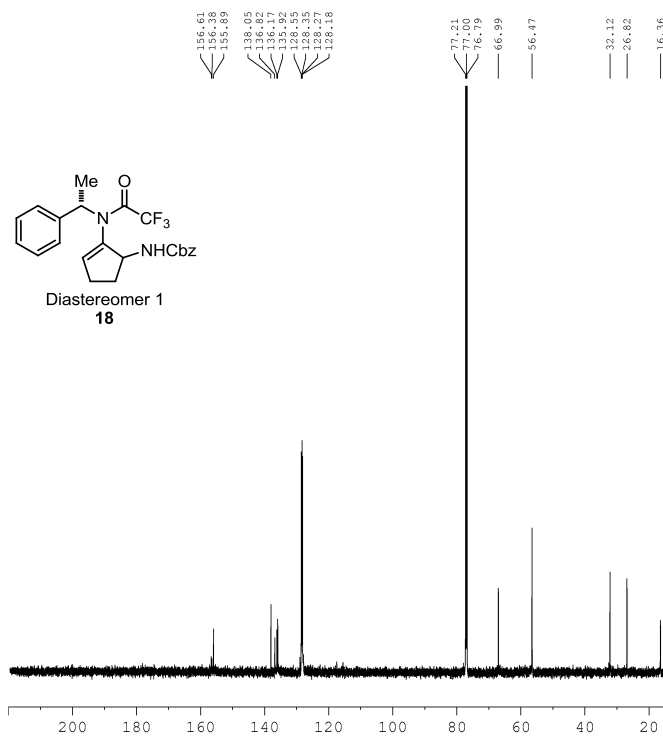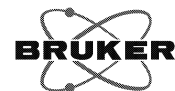

Current Data Parameters  
 NAME EJM-227-2 13C  
 EXPNO 1  
 PROCNO 1

F2 - Acquisition Parameters  
 Date\_ 20120217  
 Time 7.11  
 INSTRUM spect  
 PROBHD 5 mm PABBO BB-  
 PULPROG zgpg30  
 TD 65536  
 SOLVENT CDCl3  
 NS 1327  
 DS 0  
 SWH 36057.691 Hz  
 FIDRES 0.550197 Hz  
 AQ 0.9088159 sec  
 RG 203  
 DW 13.867 usec  
 DE 10.00 usec  
 TE 294.3 K  
 D1 2.0000000 sec  
 D11 0.0300000 sec  
 TD0 1

===== CHANNEL f1 =====  
 NUC1 13C  
 P1 10.50 usec  
 PLW1 110.0000000 W  
 SFO1 150.9178981 MHz

===== CHANNEL f2 =====  
 CPDPRG2 waltz16  
 NUC2 1H  
 PCPD2 70.00 usec  
 PLW2 20.0000000 W  
 PLW12 0.80000001 W  
 PLW13 0.39199999 W  
 SFO2 600.1324005 MHz

F2 - Processing parameters  
 SI 32768  
 SF 150.9028161 MHz  
 WDW EM  
 SSB 0  
 LB 1.00 Hz  
 GB 0  
 PC 1.40

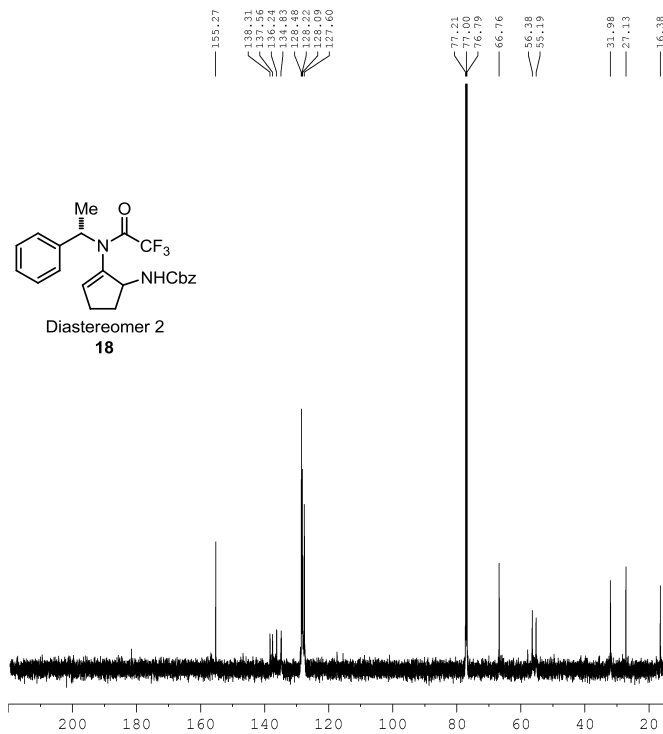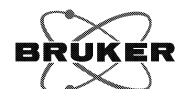

Current Data Parameters  
 NAME EJM-227-3  
 EXPNO 1  
 PROCNO 1

F2 - Acquisition Parameters  
 Date\_ 20120216  
 Time 13.07  
 INSTRUM spect  
 PROBHD 5 mm PABBO BB-  
 PULPROG zgpg30  
 TD 65536  
 SOLVENT CDCl3  
 NS 906  
 DS 4  
 SWH 36057.691 Hz  
 FIDRES 0.550197 Hz  
 AQ 0.9088159 sec  
 RG 203  
 DW 13.867 usec  
 DE 10.00 usec  
 TE 294.3 K  
 D1 2.0000000 sec  
 D11 0.0300000 sec  
 TD0 1

===== CHANNEL f1 =====  
 NUC1 13C  
 P1 10.50 usec  
 PLW1 110.0000000 W  
 SFO1 150.9178981 MHz

===== CHANNEL f2 =====  
 CPDPRG2 waltz16  
 NUC2 1H  
 PCPD2 70.00 usec  
 PLW2 20.0000000 W  
 PLW12 0.80000001 W  
 PLW13 0.39199999 W  
 SFO2 600.1324005 MHz

F2 - Processing parameters  
 SI 32768  
 SF 150.9028173 MHz  
 WDW EM  
 SSB 0  
 LB 1.00 Hz  
 GB 0  
 PC 1.40



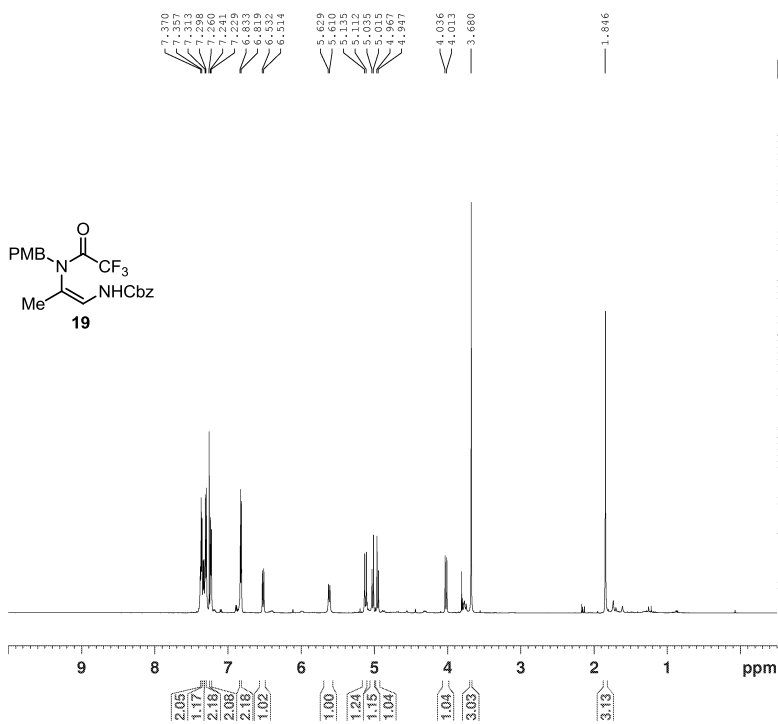

Current Data Parameters  
 NAME JTM-13-97-2  
 EXPNO 1  
 PROCNO 1

F2 - Acquisition Parameters  
 Date\_ 20120118  
 Time 11.53  
 INSTRUM spect  
 PROBHD 5 mm PABBO BB-  
 PULPROG zg30  
 TD 65536  
 SOLVENT CDCl3  
 NS 28  
 DS 0  
 SWH 12335.526 Hz  
 FIDRES 0.188225 Hz  
 AQ 2.6564426 sec  
 RG 203  
 DW 40.533 usec  
 DE 6.50 usec  
 TE 293.1 K  
 D1 1.0000000 sec  
 TDO 1

===== CHANNEL f1 =====  
 NUC1 1H  
 P1 13.80 usec  
 PLW1 20.0000000 W  
 SF01 600.1337060 MHz

F2 - Processing parameters  
 SI 65536  
 SF 600.1300179 MHz  
 WDW EM  
 SSB 0  
 LB 0.30 Hz  
 GB 0  
 PC 1.00

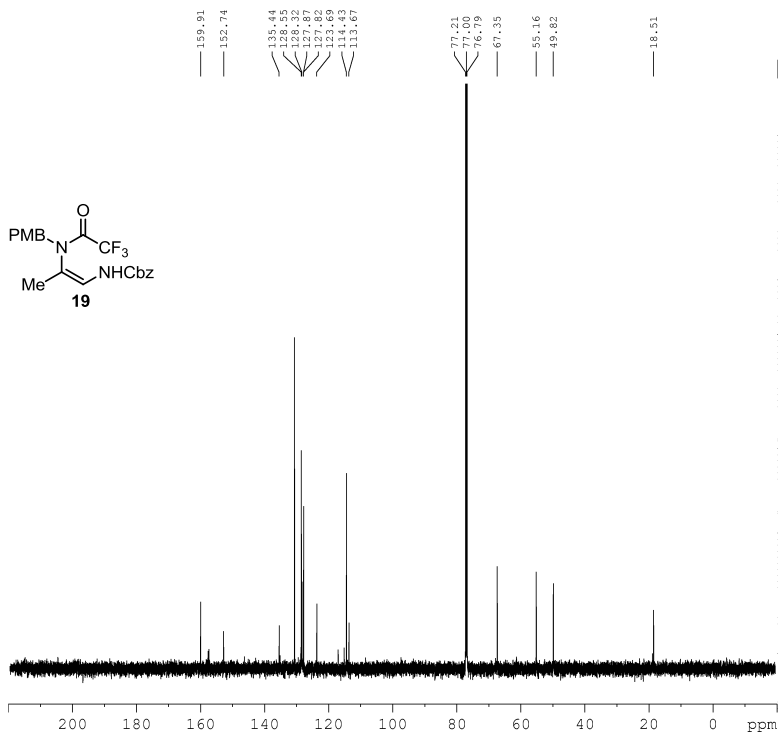

Current Data Parameters  
 NAME JTM-13-97-2 13C  
 EXPNO 1  
 PROCNO 1

F2 - Acquisition Parameters  
 Date\_ 20120118  
 Time 11.58  
 INSTRUM spect  
 PROBHD 5 mm PABBO BB-  
 PULPROG zgpg30  
 TD 65536  
 SOLVENT CDCl3  
 NS 187  
 DS 0  
 SWH 36057.691 Hz  
 FIDRES 0.550197 Hz  
 AQ 0.3088159 sec  
 RG 203  
 DW 13.867 usec  
 DE 10.00 usec  
 TE 294.4 K  
 D1 2.0000000 sec  
 D11 0.0300000 sec  
 TDO 1

===== CHANNEL f1 =====  
 NUC1 13C  
 P1 10.50 usec  
 PLW1 110.0000000 W  
 SF01 150.9178981 MHz

===== CHANNEL f2 =====  
 CDFPRG2 waltz16  
 NUC2 1H  
 PCPD2 70.00 usec  
 PLW2 20.0000000 W  
 PLW12 0.8000000 W  
 PLW13 0.3919999 W  
 SF02 600.1324005 MHz

F2 - Processing parameters  
 SI 32768  
 SF 150.9028161 MHz  
 WDW EM  
 SSB 0  
 LB 1.00 Hz  
 GB 0  
 PC 1.40

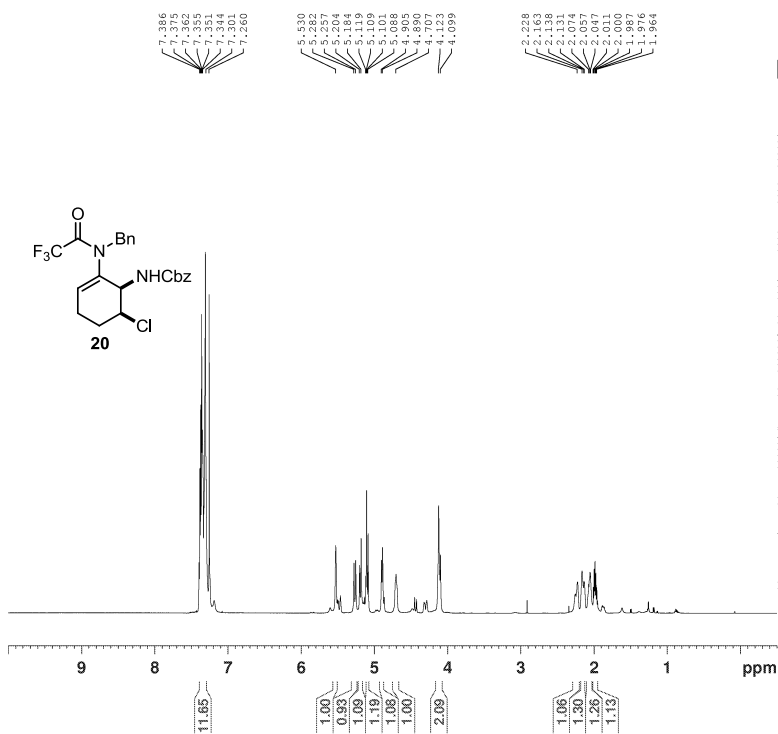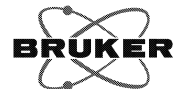

Current Data Parameters  
 NAME JTM-13-95-2  
 EXPNO 1  
 PROCNO 1

F2 - Acquisition Parameters  
 Date\_ 20120118  
 Time 14.23  
 INSTRUM spect  
 PROBHD 5 mm PABBO BB-  
 PULPROG zg30  
 TD 65536  
 SOLVENT CDCl3  
 NS 19  
 DS 0  
 SWH 12335.526 Hz  
 FIDRES 0.188225 Hz  
 AQ 2.6564426 sec  
 RG 181  
 DW 40.533 usec  
 DE 6.50 usec  
 TE 292.8 K  
 D1 1.00000000 sec  
 TDO 1

===== CHANNEL f1 =====  
 NUC1 1H  
 P1 13.80 usec  
 PLW1 20.00000000 W  
 SFO1 600.1337060 MHz

F2 - Processing parameters  
 SI 65536  
 SF 600.1300179 MHz  
 WW EM  
 SSB 0  
 LB 0.30 Hz  
 GB 0  
 PC 1.00

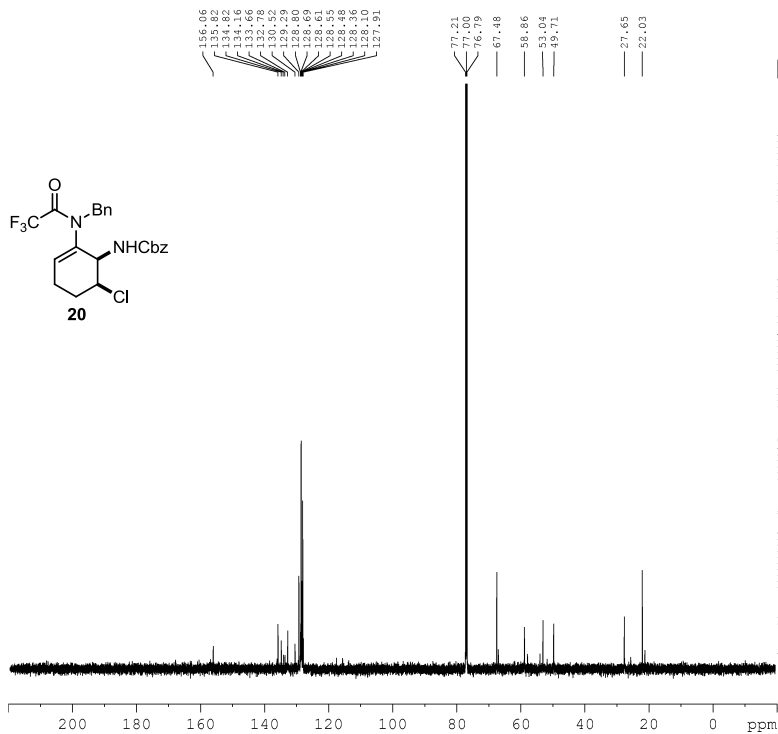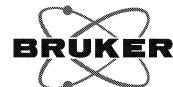

Current Data Parameters  
 NAME JTM-13-95-2 13C  
 EXPNO 1  
 PROCNO 1

F2 - Acquisition Parameters  
 Date\_ 20120118  
 Time 14.28  
 INSTRUM spect  
 PROBHD 5 mm PABBO BB-  
 PULPROG zgpg30  
 TD 65536  
 SOLVENT CDCl3  
 NS 235  
 DS 0  
 SWH 36057.691 Hz  
 FIDRES 0.550197 Hz  
 AQ 0.308159 sec  
 RG 203  
 DW 13.867 usec  
 DE 10.00 usec  
 TE 293.6 K  
 D1 2.00000000 sec  
 D11 0.03000000 sec  
 TDO 1

===== CHANNEL f1 =====  
 NUC1 13C  
 P1 10.50 usec  
 PLW1 110.00000000 W  
 SFO1 150.9178981 MHz

===== CHANNEL f2 =====  
 CDFPRG2 waltz16  
 NUC2 1H  
 PCPD2 70.00 usec  
 PLW2 20.00000000 W  
 PLW12 0.80000001 W  
 PLW13 0.39199999 W  
 SFO2 600.1324005 MHz

F2 - Processing parameters  
 SI 32768  
 SF 150.9028173 MHz  
 WW EM  
 SSB 0  
 LB 1.00 Hz  
 GB 0  
 PC 1.40

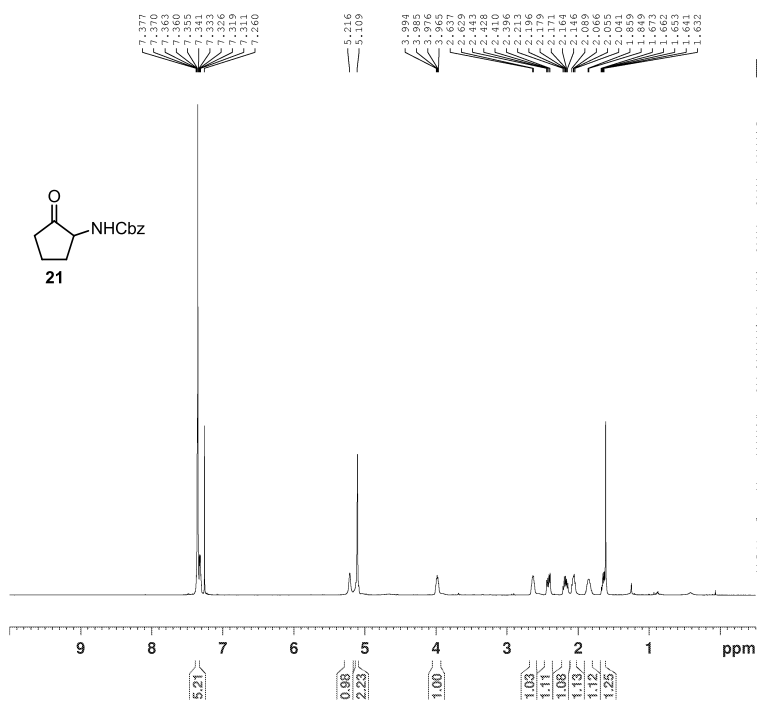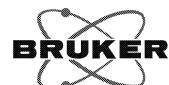

Current Data Parameters  
 NAME JTM-14-263-3 1H  
 EXPNO 1  
 PROCNO 1

F2 - Acquisition Parameters  
 Date\_ 20120419  
 Time 9.00  
 INSTRUM spect  
 PROBHD 5 mm PABBO BB-  
 PULPROG zg30  
 TD 65536  
 SOLVENT CDCl3  
 NS 21  
 DS 0  
 SWH 12335.526 Hz  
 FIDRES 0.188225 Hz  
 AQ 2.6564426 sec  
 RG 203  
 DW 40.533 usec  
 DE 6.50 usec  
 TE 293.6 K  
 D1 1.0000000 sec  
 TDO 1

==== CHANNEL f1 =====  
 NUC1 1H  
 P1 13.60 usec  
 PLW1 20.0000000 W  
 SFO1 600.1337060 MHz

F2 - Processing parameters  
 SI 65536  
 SF 600.1300180 MHz  
 MDW EM  
 SSB 0  
 LB 0.30 Hz  
 GB 0  
 PC 1.00

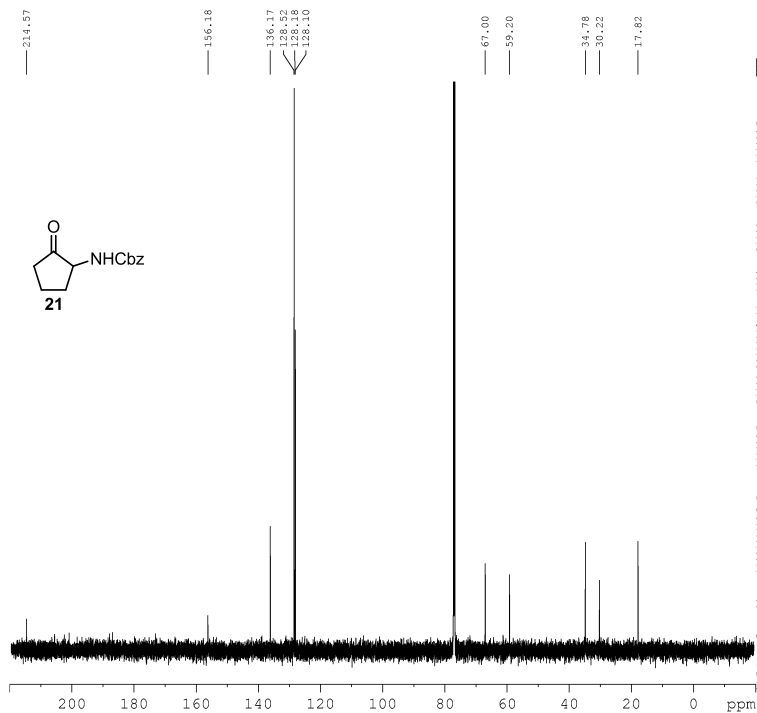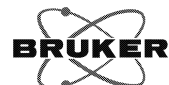

Current Data Parameters  
 NAME JTM-14-263-3 13C  
 EXPNO 1  
 PROCNO 1

F2 - Acquisition Parameters  
 Date\_ 20120419  
 Time 9.04  
 INSTRUM spect  
 PROBHD 5 mm PABBO BB-  
 PULPROG zgpg30  
 TD 65536  
 SOLVENT CDCl3  
 NS 533  
 DS 0  
 SWH 36057.691 Hz  
 FIDRES 0.550197 Hz  
 AQ 0.9088159 sec  
 RG 203  
 DW 13.867 usec  
 DE 10.00 usec  
 TE 294.8 K  
 D1 2.0000000 sec  
 D11 0.0300000 sec  
 TDO 1

==== CHANNEL f1 =====  
 NUC1 13C  
 P1 10.50 usec  
 PLW1 110.0000000 W  
 SFO1 150.9178981 MHz

==== CHANNEL f2 =====  
 CPDPRG2 wait16  
 NUC2 1H  
 PCPD2 70.00 usec  
 PLW2 20.0000000 W  
 PLW12 0.9300000 W  
 PLW13 0.39199999 W  
 SFO2 600.1324005 MHz

F2 - Processing parameters  
 SI 32768  
 SF 150.9028156 MHz  
 MDW EM  
 SSB 0  
 LB 1.00 Hz  
 GB 0  
 PC 1.40

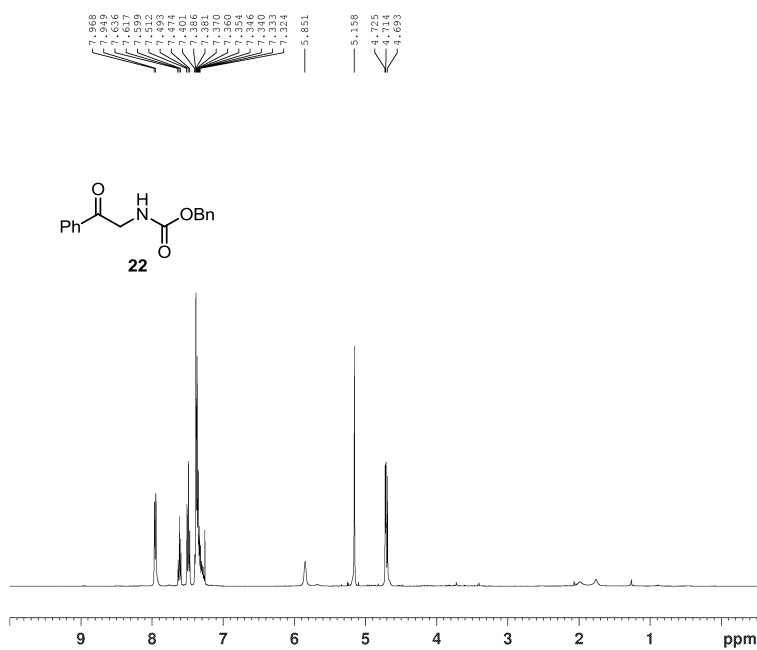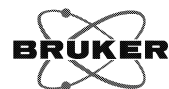

Current Data Parameters  
 NAME JTM-15-69-B-top  
 EXPNO 1  
 PROCNO 1

F2 - Acquisition Parameters  
 Date\_ 20120502  
 Time 16.09  
 INSTRUM spect  
 PROBHD 5 mm PABBO BB-  
 PULPROG zg30  
 TD 65536  
 SOLVENT CDCl3  
 NS 10  
 DS 0  
 SWH 8223.685 Hz  
 FIDRES 0.125483 Hz  
 AQ 3.9846387 sec  
 RG 78.87  
 DW 60.800 usec  
 DE 6.50 usec  
 TE 297.2 K  
 D1 1.00000000 sec  
 TDO 1

===== CHANNEL f1 =====  
 NUC1 1H  
 P1 12.38 usec  
 PLW1 11.19999981 W  
 SFO1 400.0924707 MHz

F2 - Processing parameters  
 SI 65536  
 SF 400.0900109 MHz  
 WDW EM  
 SSB 0  
 LB 0.30 Hz  
 GB 0  
 PC 1.00

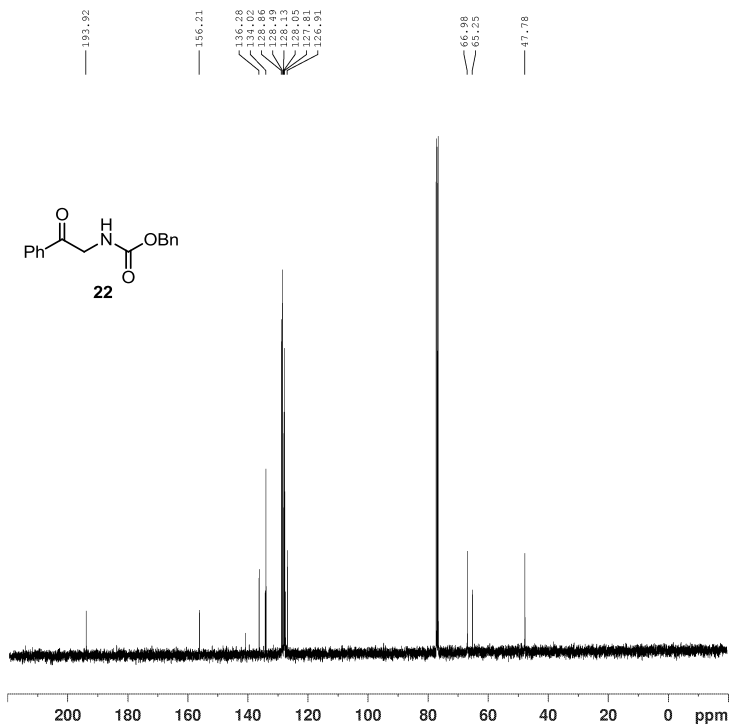

Current Data Parameters  
 NAME JTM-15-69-B-top 1  
 EXPNO 1  
 PROCNO 1

F2 - Acquisition Parameter  
 Date\_ 20120502  
 Time 16.12  
 INSTRUM spect  
 PROBHD 5 mm PABBO BB-  
 PULPROG zgpg30  
 TD 65536  
 SOLVENT CDCl3  
 NS 121  
 DS 0  
 SWH 24038.461 Hz  
 FIDRES 0.366798 Hz  
 AQ 1.3621988 sec  
 RG 50.11  
 DW 20.800 usec  
 DE 6.50 usec  
 TE 297.6 K  
 D1 2.00000000 sec  
 D11 0.03000000 sec  
 TDO 1

===== CHANNEL f1 =====  
 NUC1 13C  
 P1 7.50 usec  
 PLW1 61.20000076 W  
 SFO1 100.6127703 MHz

===== CHANNEL f2 =====  
 CPDPRG2 waltz16  
 NUC2 1H  
 PCPD2 80.00 usec  
 PLW2 11.19999981 W  
 PLW12 0.26820999 W  
 PLW13 0.17166001 W  
 SFO2 400.0916004 MHz

F2 - Processing parameters  
 SI 32768  
 SF 100.6027193 MHz  
 WDW EM  
 SSB 0  
 LB 1.00 Hz  
 GB 0  
 PC 1.40

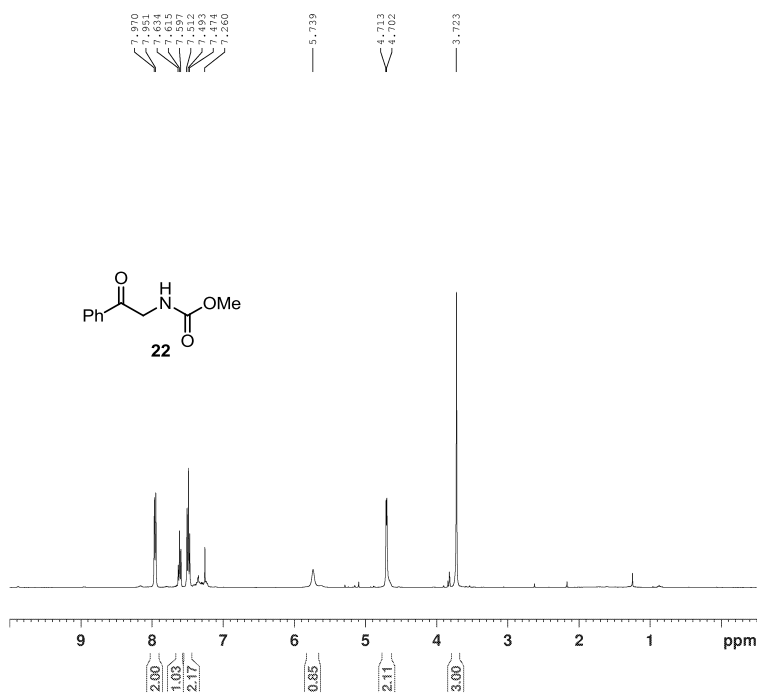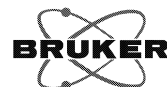

Current Data Parameters  
 NAME JTM-14-289-5  
 EXPNO 1  
 PROCNO 1

F2 - Acquisition Parameters  
 Date\_ 20120423  
 Time 10.27  
 INSTRUM spect  
 PROBHD 5 mm PABBO BB-  
 PULPROG zg30  
 TD 65536  
 SOLVENT CDCl3  
 NS 13  
 DS 0  
 SWH 8223.685 Hz  
 FIDRES 0.125483 Hz  
 AQ 3.9846387 sec  
 RG 134.63  
 DW 60.800 usec  
 DE 6.50 usec  
 TE 296.8 K  
 D1 1.0000000 sec  
 TD0 1

===== CHANNEL f1 =====  
 NUC1 1H  
 P1 12.38 usec  
 PLW1 11.1999981 W  
 SF01 400.0924707 MHz

F2 - Processing parameters  
 SI 65536  
 SF 400.0900111 MHz  
 WDW EM  
 SSB 0  
 LB 0.30 Hz  
 GB 0  
 PC 1.00

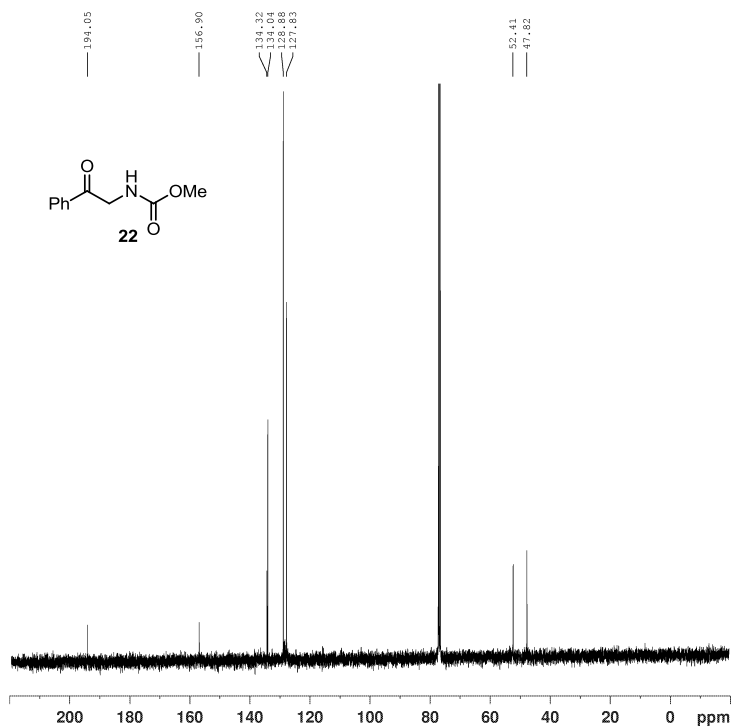

Current Data Parameters  
 NAME JTM-14-289-5 13C  
 EXPNO 1  
 PROCNO 1

F2 - Acquisition Parameter  
 Date\_ 20120423  
 Time 10.31  
 INSTRUM spect  
 PROBHD 5 mm PABBO BB-  
 PULPROG zgpg30  
 TD 65536  
 SOLVENT CDCl3  
 NS 215  
 DS 0  
 SWH 24038.461 Hz  
 FIDRES 0.366798 Hz  
 AQ 1.3631988 sec  
 RG 200.09  
 DW 20.800 usec  
 DE 6.50 usec  
 TE 297.3 K  
 D1 2.0000000 sec  
 D11 0.03000000 sec  
 TD0 1

===== CHANNEL f1 =====  
 NUC1 13C  
 P1 7.50 usec  
 PLW1 61.20000076 W  
 SF01 100.6127703 MHz

===== CHANNEL f2 =====  
 CPDPRG2 waltz16  
 NUC2 1H  
 PCPD2 80.00 usec  
 PLW2 11.1999981 W  
 PLW12 0.26820999 W  
 PLW13 0.17166001 W  
 SF02 400.0916004 MHz

F2 - Processing parameters  
 SI 32768  
 SF 100.6027156 MHz  
 WDW EM  
 SSB 0  
 LB 1.00 Hz  
 GB 0  
 PC 1.40

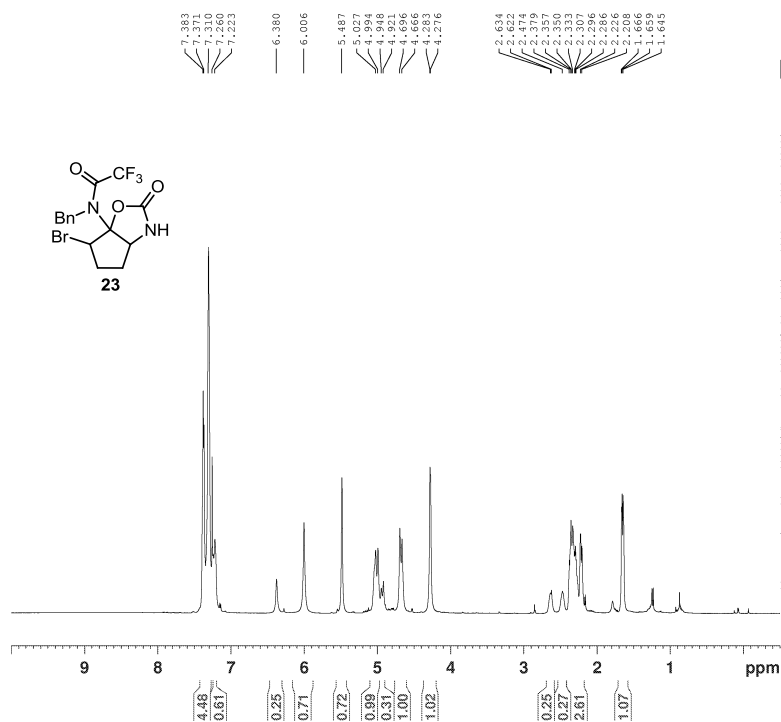

Current Data Parameters  
 NAME JTM-13-253-1 1H  
 EXPNO 1  
 PROCNO 1

F2 - Acquisition Parameters  
 Date\_ 20120217  
 Time 13.30  
 INSTRUM spect  
 PROBHD 5 mm PABBO BB-  
 PULPROG zg30  
 TD 65536  
 SOLVENT CDCl3  
 NS 19  
 DS 0  
 SWH 12335.526 Hz  
 FIDRES 0.188225 Hz  
 AQ 2.6564426 sec  
 RG 114  
 DW 40.533 usec  
 DE 6.50 usec  
 TE 293.2 K  
 D1 1.00000000 sec  
 TD0 1

===== CHANNEL f1 =====  
 NUC1 1H  
 P1 13.80 usec  
 PLW1 20.00000000 W  
 SF01 600.1337060 MHz

F2 - Processing parameters  
 SI 65536  
 SF 600.1300179 MHz  
 WW EM  
 SSB 0  
 LB 0.30 Hz  
 GB 0  
 PC 1.00

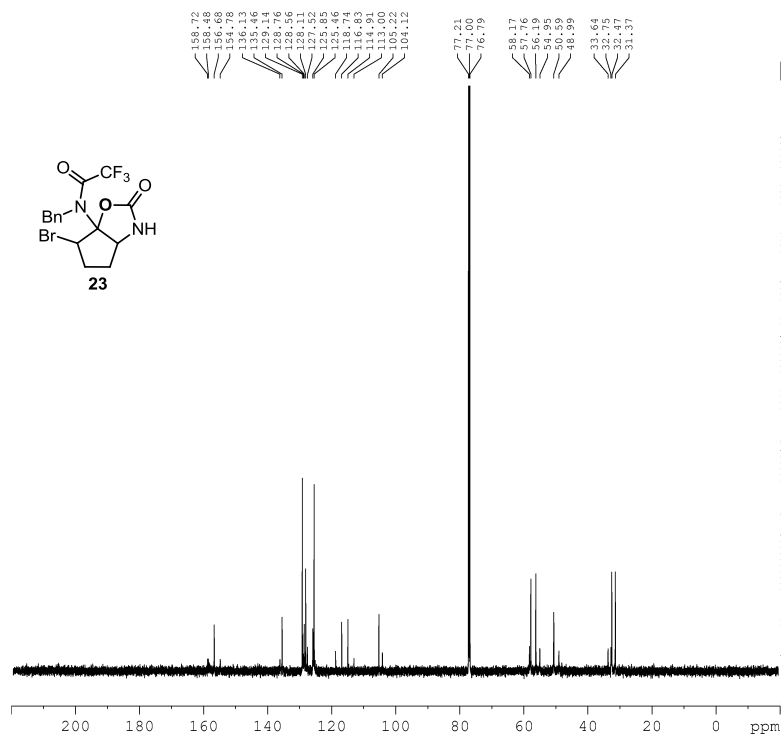

Current Data Parameters  
 NAME JTM-13-253-1 13C  
 EXPNO 1  
 PROCNO 1

F2 - Acquisition Parameters  
 Date\_ 20120217  
 Time 13.36  
 INSTRUM spect  
 PROBHD 5 mm PABBO BB-  
 PULPROG zgpg30  
 TD 65536  
 SOLVENT CDCl3  
 NS 421  
 DS 0  
 SWH 36057.691 Hz  
 FIDRES 0.550197 Hz  
 AQ 0.3088159 sec  
 RG 203  
 DW 13.867 usec  
 DE 10.00 usec  
 TE 294.4 K  
 D1 2.00000000 sec  
 D11 0.03000000 sec  
 TD0 1

===== CHANNEL f1 =====  
 NUC1 13C  
 P1 10.50 usec  
 PLW1 110.00000000 W  
 SF01 150.9178981 MHz

===== CHANNEL f2 =====  
 CDEPRG2 waltz16  
 NUC2 1H  
 PCPD2 70.00 usec  
 PLW2 20.00000000 W  
 PLW12 0.80000001 W  
 PLW13 0.39199999 W  
 SF02 600.1324005 MHz

F2 - Processing parameters  
 SI 32768  
 SF 150.9028206 MHz  
 WW EM  
 SSB 0  
 LB 1.00 Hz  
 GB 0  
 PC 1.40
